# Supplementary material
Source: publisher figshare collection journal article supplement (https://gsajournals.figshare.com/ndownloader/files/26426195)
Supplement: Supplementary file 1 [file 26426195]

## Sheet: Supplementary Table 1
Supplementary Table 1: Table of next-generation sequencing information used in this survey with number of reads per sample and accession numbers per sample.
	ID	Species	Data type	Number of reads (or read pairs)	NCBI SRA
	DD_MI	D. dunni	Oxford Nanopore MinION single-end	269217	SRR12581817
	DN_MI	D. nigrodunni	Oxford Nanopore MinION single-end	404473	SRR12581816
	DA_IL	D. arawakhana	Illumina HiSeq4000 150bp paired-end	3445120	TBDSRR12581812
	DD_IL	D. dunni	Illumina HiSeq4000 150bp paired-end	11264930	SRR12581815
	DN_IL	D. nigrodunni	Illumina HiSeq4000 150bp paired-end	5466662	SRR12581814
	DS_IL	D. similis	Illumina HiSeq4000 150bp paired-end	10736158	SRR12581813
	Ddun	D. dunni	Genome assembly	NA	SAMN16049375
	Dnig	D. nigrodunni	Genome assembly	NA	SAMN16049376

## Sheet: Supplementary Table 2
Supplementary Table 2: Average number of offspring from each set of crosses, either heterospecific or conspecific crosses after 1 week of mating and 1 week of egg laying. Table also shows the sex ratio of offspring and if offspring of each sex are fertile.
	Paternal Species	Maternal Species	Male Offspring	Female Offspring	Sex Ratio	Fertile Male	Fertile Female
	D.arawakhana	D.arawakhana	44	46	0.511111	Y	Y
	D.arawakhana	D.arawakhana	45	45	0.5	Y	Y
	D.arawakhana	D.arawakhana	32	33	0.507692	Y	Y
	D.arawakhana	D.dunni	3	5	0.625	N	N
	D.arawakhana	D.dunni	1	1	0.5	N	N
	D.arawakhana	D.dunni	0	0	NA	NA	NA
	D.arawakhana	D.nigrodunni	1	11	0.916667	N	Y
	D.arawakhana	D.nigrodunni	0	12	1	N	Y
	D.arawakhana	D.nigrodunni	0	5	1	N	Y
	D.arawakhana	D.similis	0	0	NA	NA	NA
	D.arawakhana	D.similis	0	0	NA	NA	NA
	D.arawakhana	D.similis	0	0	NA	NA	NA
	D.dunni	D.arawakhana	7	6	0.461538	N	N
	D.dunni	D.arawakhana	2	3	0.6	N	N
	D.dunni	D.arawakhana	4	5	0.555556	N	N
	D.dunni	D.dunni	29	30	0.508475	Y	Y
	D.dunni	D.dunni	36	37	0.506849	Y	Y
	D.dunni	D.dunni	41	40	0.493827	Y	Y
	D.dunni	D.nigrodunni	0	0	NA	NA	NA
	D.dunni	D.nigrodunni	0	0	NA	NA	NA
	D.dunni	D.nigrodunni	0	0	NA	NA	NA
	D.dunni	D.similis	6	17	0.73913	Y	Y
	D.dunni	D.similis	4	15	0.789474	Y	Y
	D.dunni	D.similis	9	14	0.608696	Y	Y
	D.nigrodunni	D.arawakhana	11	9	0.45	N	Y
	D.nigrodunni	D.arawakhana	11	13	0.541667	N	Y
	D.nigrodunni	D.arawakhana	12	14	0.538462	N	Y
	D.nigrodunni	D.dunni	8	5	0.384615	N	N
	D.nigrodunni	D.dunni	0	0	NA	NA	NA
	D.nigrodunni	D.dunni	0	0	NA	NA	NA
	D.nigrodunni	D.nigrodunni	43	45	0.511364	Y	Y
	D.nigrodunni	D.nigrodunni	41	43	0.511905	Y	Y
	D.nigrodunni	D.nigrodunni	40	40	0.5	Y	Y
	D.nigrodunni	D.similis	0	0	NA	NA	NA
	D.nigrodunni	D.similis	0	0	NA	NA	NA
	D.nigrodunni	D.similis	0	0	NA	NA	NA
	D.similis	D.arawakhana	0	0	NA	NA	NA
	D.similis	D.arawakhana	0	0	NA	NA	NA
	D.similis	D.arawakhana	0	0	NA	NA	NA
	D.similis	D.dunni	8	10	0.555556	Y	Y
	D.similis	D.dunni	10	11	0.52381	Y	Y
	D.similis	D.dunni	14	12	0.461538	Y	Y
	D.similis	D.nigrodunni	0	0	NA	NA	NA
	D.similis	D.nigrodunni	0	0	NA	NA	NA
	D.similis	D.nigrodunni	0	0	NA	NA	NA
	D.similis	D.similis	28	27	0.490909	Y	Y
	D.similis	D.similis	32	34	0.515152	Y	Y
	D.similis	D.similis	38	37	0.493333	Y	Y

## Sheet: Supplementary Table 3
Supplementary Table 3: Table showing average synonymous divergence (dS) between each species pair.
		Dara	Ddun	Dnig	Dsim	Dinn
	Dara	0
	Ddun	0.0615463	0
	Dnig	0.010087	0.0665584	0
	Dsim	0.0470168	0.0067803	0.0520289	0
	Dinn	0.343566	0.348578	0.369798	0.355269	0

## Sheet: Supplementary Table 4
Supplementary Table 4: Table summarizing genome assembly statistics of each species sequenced and assembled chromosomes, including number of scaffolds for each chromosome, the length of each chromosome, and coding and intronic proportions.
	Species	Muller	Total Length (bp)	Scaffolds	Mean scaffold length (bp)	Longest scaffold Length (bp)	Genic length (bp)	Genic proportion	Coding (bp)	Coding proportion	Intronic (bp)	Intronic proportion	Repetitive (bp)	Repetitive proportion
	Dara	A	36492624	19	1.92066e+06	26576992	8567962	0.234786	2795917	0.0766159	5772045	0.15817	7022409	0.192434
	Dara	B	25808678	8	3.22608e+06	15885831	8491951	0.329035	3536608	0.137032	4955343	0.192003	3391802	0.131421
	Dara	C	21985094	5	2457620	9647735	3753412	0.170725	1651682	0.0751274	2101730	0.095598	1241610	0.0564751
	Dara	D	24687543	6	4.11459e+06	17141828	8178613	0.331285	3705991	0.150116	4472622	0.181169	19141	0.00077533
	Dara	E	30650506	3	1.02168e+07	30149082	10558334	0.344475	4507053	0.147047	6051281	0.197428	347142	0.0113258
	Dara	F	1226982	2	613491	1157873	562304	0.458282	222045	0.180968	340259	0.277314	237223	0.193339
	Dara	U	4192271	59	272448	12154614	4730393	1.12836	2252983	0.537413	2477410	0.590947	3985467	0.95067
	Dara	total	145043698	102			44842969	0.309169	18672279	0.128736	26170690	0.180433	16244794	0.111999
	Ddun	A	35128931	19	1.84889e+06	7767783	8724919	0.248368	2971084	0.0845766	5753835	0.163792	6402029	0.182244
	Ddun	B	25777524	13	1.98289e+06	17821787	8067741	0.312976	3520570	0.136575	4547171	0.176401	1618070	0.0627706
	Ddun	C	22190490	7	3170070	13345832	8550075	0.385304	3923305	0.176801	4626770	0.208502	520407	0.0234518
	Ddun	D	24506178	5	4.90124e+06	7982912	8093990	0.330284	3708612	0.151334	4385378	0.17895	3209260	0.130957
	Ddun	E	31201028	5	6.24021e+06	11446328	11391273	0.365093	4769387	0.15286	6621886	0.212233	2065043	0.0661851
	Ddun	F	1537396	1	1537396	1537396	594729	0.386842	229493	0.149274	365236	0.237568	569014	0.370115
	Ddun	U	8583387	91	94322.9	470200	922	0.000107417	660	7.68927e-05	262	3.05241e-05	7864314	0.916225
	Ddun	total	148924934	141			45423649	0.30501	19123111	0.128408	26300538	0.176603	22248137	0.149392
	Dnig	A	36597436	19	1.92618e+06	26634946	8395667	0.229406	2804183	0.0766224	5591484	0.152783	7064535	0.193034
	Dnig	B	25858726	8	3.23234e+06	15903881	8343478	0.322656	3516343	0.135983	4827135	0.186673	3399032	0.131446
	Dnig	C	21996667	5	2459057	9653480	3730085	0.169575	1653644	0.075177	2076441	0.094398	1239897	0.0563675
	Dnig	D	24717633	6	4.11961e+06	17162308	8101751	0.327772	3680190	0.148889	4421561	0.178883	2215684	0.0896398
	Dnig	E	30672223	3	1.02241e+07	30164905	10964898	0.357486	4512037	0.147105	6452861	0.210381	352980	0.0115081
	Dnig	F	1231369	2	615684	1162264	546489	0.443806	222138	0.180399	324351	0.263407	237513	0.192885
	Dnig	U	16391842	59	273197	12160439	4697981	0.286605	2241408	0.136739	2456573	0.149866	4020074	0.245248
	Dnig	total	157465896	102			44780349	0.284381	18629943	0.118311	26150406	0.16607	18529715	0.117674
	Dsim	A	35066023	19	1.84558e+06	7730898	8771377	0.250139	3050556	0.0869946	5720821	0.163144	4119736	0.117485
	Dsim	B	25769512	13	1.98227e+06	17817340	8215841	0.31882	3568413	0.138474	4647428	0.180346	1294563	0.0502362
	Dsim	C	22160171	7	3.16574e+06	13330077	8595551	0.387883	3958946	0.178651	4636605	0.209231	514051	0.0231971
	Dsim	D	24464253	5	4.89285e+06	7977231	8437385	0.344886	3817318	0.156037	4620067	0.18885	116546	0.00476393
	Dsim	E	31171778	5	6.23436e+06	11436834	11279447	0.361848	4851791	0.155647	6427656	0.206201	811442	0.0260313
	Dsim	F	1530414	1	1530414	1530414	573216	0.37455	238478	0.155826	334738	0.218724	563915	0.368472
	Dsim	U	8510467	91	93521.6	468153	922	0.000108337	660	7.75516e-05	262	3.07856e-05	7795602	0.916002
	Dsim	total	148672618	141			45873739	0.308555	19486162	0.131068	26387577	0.177488	15215855	0.102345

## Sheet: Supplementary Table 5
Supplementary Table 5: Summary statistics of genomes sequenced assembled and annotated in this study, including number of genes, the number of these that have orthologs in D. virilis and D. melanogaster, as well as statistics regarding size of these genes.
	Species	N50 (bp)	N90 (bp)	Gene number	Number of D.vir orthologs	Number of D. mel orthologs	Number of D. inn orthologs	Mean gene Length (bp)	Minimum gene length (bp)	Maximum gene length (bp)	Mean no. exons per gene	Minimum no. exons per gene	Maximum no. exons per gene	Mean exon Length
	Dara	17141828	1920981	10728	10633	10528	10691	4180.35	206	114908	4.44789	1	82	1786.98
	Ddun	17767783	1541915	11581	11454	11351	11532	3922.62	203	124456	4.29056	1	56	1591.48
	Dnig	17162308	1930153	10752	10651	10549	10698	4165.94	206	100844	4.43936	1	82	1806.18
	Dsim	17730898	1541985	11510	11399	11290	11498	3986.58	196	132611	4.26968	1	85	1734.46

## Sheet: Supplementary Table 6
Supplementary Table 6: Gene categories enriched for high dN/dS (either the upper 95th percentile or dN/dS > 1) across the entire phylogeny and on each species branch, also the upper outliers for D. nigrodunni and D. arawakana relative to the other species.
	entire tree dN/dS > 1 enrich
	GO Term	Description	P-value	FDR q-value	Enrichment	N	B	n	b	Genes
	GO:0007617	mating behavior	1.53e-05	0.109	7.06	7134	105	77	8	[Jhe - juvenile hormone esterase, fru - fruitless, lectin-46Cb - cg1652 gene product from transcript cg1652-ra, pros - prospero, ss - spineless, pain - painless, mbl - muscleblind, bol - boule]
	GO:0019098	reproductive behavior	2.15e-05	0.0764	6.74	7134	110	77	8	[Jhe - juvenile hormone esterase, fru - fruitless, lectin-46Cb - cg1652 gene product from transcript cg1652-ra, pros - prospero, ss - spineless, pain - painless, mbl - muscleblind, bol - boule]
	GO:0045924	regulation of female receptivity	3.42e-05	0.081	20.59	7134	18	77	4	[lectin-46Cb - cg1652 gene product from transcript cg1652-ra, pain - painless, mbl - muscleblind, bol - boule]
	GO:0060180	female mating behavior	0.000113	0.201	15.44	7134	24	77	4	[lectin-46Cb - cg1652 gene product from transcript cg1652-ra, pain - painless, mbl - muscleblind, bol - boule]
	GO:0007610	behavior	0.000346	0.49	2.97	7134	405	77	13	[fru - fruitless, mnb - minibrain, hppy - happyhour, pain - painless, tomosyn - cg17762 gene product from transcript cg17762-ri, Jhe - juvenile hormone esterase, lectin-46Cb - cg1652 gene product from transcript cg1652-ra, gat - gate, pros - prospero, ss - spineless, rg - rugose, mbl - muscleblind, bol - boule]
	GO:0044703	multi-organism reproductive process	0.000612	0.724	17.37	7134	16	77	3	[fru - fruitless, lectin-46Cb - cg1652 gene product from transcript cg1652-ra, pain - painless]
	GO:0048609	multicellular organismal reproductive process	0.000816	0.827	3.06	7134	333	77	11	[Rab5 - cg3664 gene product from transcript cg3664-rc, Jhe - juvenile hormone esterase, Tm1 - tropomyosin 1, fru - fruitless, JIL-1 - cg6297 gene product from transcript cg6297-rc, lectin-46Cb - cg1652 gene product from transcript cg1652-ra, pros - prospero, ss - spineless, pain - painless, mbl - muscleblind, bol - boule]
	entire tree dN/dS > 95th percentile
	GO Term	Description	P-value	FDR q-value	Enrichment	N	B	n	b	Genes
	GO:0007610	behavior	0.000506	1	1.63	7134	405	508	47	[lig - lingerer, Syt1 - synaptotagmin 1, Ank2 - ankyrin 2, hppy - happyhour, eas - easily shocked, tomosyn - cg17762 gene product from transcript cg17762-ri, 5-HT1A - serotonin receptor 1a, gish - gilgamesh, Gr23a - gustatory receptor 23a, be - ben, ppk29 - pickpocket 29, lectin-46Cb - cg1652 gene product from transcript cg1652-ra, tyf - twenty-four, Gr59d - gustatory receptor 59d, vsg - visgun, …
	GO:0009166	nucleotide catabolic process	0.000705	1	3.87	7134	29	508	8	[Hex-t2 - cg32849 gene product from transcript cg32849-ra, CG9961 - cg9961 gene product from transcript cg9961-rb, CG7059 - cg7059 gene product from transcript cg7059-ra, Aps - cg6391 gene product from transcript cg6391-rc, CG9010 - cg9010 gene product from transcript cg9010-ra, CG3788 - cg3788 gene product from transcript cg3788-rb, veil - cg4827 gene product from transcript cg4827-ra, Ald - ald…
	GO:1901292	nucleoside phosphate catabolic process	0.000902	1	3.74	7134	30	508	8	[Hex-t2 - cg32849 gene product from transcript cg32849-ra, CG9961 - cg9961 gene product from transcript cg9961-rb, CG7059 - cg7059 gene product from transcript cg7059-ra, Aps - cg6391 gene product from transcript cg6391-rc, CG9010 - cg9010 gene product from transcript cg9010-ra, CG3788 - cg3788 gene product from transcript cg3788-rb, veil - cg4827 gene product from transcript cg4827-ra, Ald - ald…
	Dara dN/dS > 95th percentile
	GO Term	Description	P-value	FDR q-value	Enrichment	N	B	n	b	Genes
	GO:0016814	hydrolase activity, acting on carbon-nitrogen (but not peptide) bonds, in cyclic amidines	0.000532	1	9.75	7134	12	244	4	[Adgf-E - adenosine deaminase-related growth factor e, pug - pugilist, Adar - adenosine deaminase acting on rna, Adgf-A - adenosine deaminase-related growth factor a]
	Dnig dN/dS > 95th percentile
	GO Term	Description	P-value	FDR q-value	Enrichment	N	B	n	b	Genes
	GO:0007620	copulation	0.000324	1	19.28	7134	6	185	3	[lig - lingerer, pain - painless, per - period]
	GO:1904893	negative regulation of STAT cascade	0.000357	1	11.02	7134	14	185	4	[Diedel - cg11501 gene product from transcript cg11501-ra, lig - lingerer, CG30423 - cg30423 gene product from transcript cg30423-rd, Socs36E - suppressor of cytokine signaling at 36e]
	GO:0046426	negative regulation of JAK-STAT cascade	0.000357	0.845	11.02	7134	14	185	4	[Diedel - cg11501 gene product from transcript cg11501-ra, lig - lingerer, CG30423 - cg30423 gene product from transcript cg30423-rd, Socs36E - suppressor of cytokine signaling at 36e]
	GO:0007618	mating	0.000556	0.986	16.53	7134	7	185	3	[lig - lingerer, pain - painless, per - period]
	GO:0044703	multi-organism reproductive process	0.000624	0.885	9.64	7134	16	185	4	[lig - lingerer, Pkd2 - polycystic kidney disease gene-2, pain - painless, per - period]
	Ddun dN/dS > 95th percentile
	GO Term	Description	P-value	FDR q-value	Enrichment	N	B	n	b	Genes
	GO:0009261	ribonucleotide catabolic process	2.09e-05	0.148	19.02	7134	6	250	4	[Aps - cg6391 gene product from transcript cg6391-rc, Pde9 - phosphodiesterase 9, CG30103 - cg30103 gene product from transcript cg30103-ra, veil - cg4827 gene product from transcript cg4827-ra]
	GO:0009154	purine ribonucleotide catabolic process	2.09e-05	0.0741	19.02	7134	6	250	4	[Aps - cg6391 gene product from transcript cg6391-rc, Pde9 - phosphodiesterase 9, CG30103 - cg30103 gene product from transcript cg30103-ra, veil - cg4827 gene product from transcript cg4827-ra]
	GO:0006195	purine nucleotide catabolic process	4.74e-05	0.112	16.31	7134	7	250	4	[Aps - cg6391 gene product from transcript cg6391-rc, Pde9 - phosphodiesterase 9, CG30103 - cg30103 gene product from transcript cg30103-ra, veil - cg4827 gene product from transcript cg4827-ra]
	GO:0009125	nucleoside monophosphate catabolic process	0.000166	0.294	21.4	7134	4	250	3	[Aps - cg6391 gene product from transcript cg6391-rc, CG30103 - cg30103 gene product from transcript cg30103-ra, veil - cg4827 gene product from transcript cg4827-ra]
	GO:0009128	purine nucleoside monophosphate catabolic process	0.000166	0.235	21.4	7134	4	250	3	[Aps - cg6391 gene product from transcript cg6391-rc, CG30103 - cg30103 gene product from transcript cg30103-ra, veil - cg4827 gene product from transcript cg4827-ra]
	GO:0009169	purine ribonucleoside monophosphate catabolic process	0.000166	0.196	21.4	7134	4	250	3	[Aps - cg6391 gene product from transcript cg6391-rc, CG30103 - cg30103 gene product from transcript cg30103-ra, veil - cg4827 gene product from transcript cg4827-ra]
	GO:0009158	ribonucleoside monophosphate catabolic process	0.000166	0.168	21.4	7134	4	250	3	[Aps - cg6391 gene product from transcript cg6391-rc, CG30103 - cg30103 gene product from transcript cg30103-ra, veil - cg4827 gene product from transcript cg4827-ra]
	GO:0022402	cell cycle process	0.000252	0.223	2	7134	414	250	29	[spn-E - spindle e, JIL-1 - cg6297 gene product from transcript cg6297-rc, mus312 - mutagen-sensitive 312, CycE - cyclin e, dm - diminutive, krimp - krimper, Prosbeta7 - proteasome beta7 subunit, pch2 - cg31453 gene product from transcript cg31453-ra, Cenp-C - cg31258 gene product from transcript cg31258-ra, CG5921 - cg5921 gene product from transcript cg5921-rc, Trf4-1 - cg11265 gene product fro…
	GO:0007422	peripheral nervous system development	0.000483	0.381	4.87	7134	41	250	7	[CycA - cyclin a, dmt - dalmatian, vvl - ventral veins lacking, pros - prospero, CycE - cyclin e, insc - inscuteable, N - notch]
	GO:1903046	meiotic cell cycle process	0.000512	0.363	2.55	7134	179	250	16	[spn-E - spindle e, JIL-1 - cg6297 gene product from transcript cg6297-rc, Klp10A - cg1453 gene product from transcript cg1453-rd, mus312 - mutagen-sensitive 312, krimp - krimper, Brca2 - breast cancer 2, early onset homolog, pch2 - cg31453 gene product from transcript cg31453-ra, Cenp-C - cg31258 gene product from transcript cg31258-ra, eff - effete, Rab5 - cg3664 gene product from transcript cg…
	GO:0045924	regulation of female receptivity	6.18e-05	0.438	11.07	7134	18	179	5	[CG17575 - cg17575 gene product from transcript cg17575-ra, lectin-46Cb - cg1652 gene product from transcript cg1652-ra, pain - painless, mbl - muscleblind, bol - boule]
	GO:0060180	female mating behavior	0.000271	0.962	8.3	7134	24	179	5	[CG17575 - cg17575 gene product from transcript cg17575-ra, lectin-46Cb - cg1652 gene product from transcript cg1652-ra, pain - painless, mbl - muscleblind, bol - boule]
	Dsim dN/dS > 95th percentile
	GO Term	Description	P-value	FDR q-value	Enrichment	N	B	n	b	Genes
	GO:0007400	neuroblast fate determination	0.000157	1	9.26	7134	22	175	5	[numb - cg3779 gene product from transcript cg3779-rb, pros - prospero, abd-A - abdominal a, CycE - cyclin e, ac - achaete]
	GO:0048867	stem cell fate determination	0.000437	1	7.55	7134	27	175	5	[numb - cg3779 gene product from transcript cg3779-rb, pros - prospero, abd-A - abdominal a, CycE - cyclin e, ac - achaete]
	GO:0072337	modified amino acid transport	0.000598	1	40.77	7134	2	175	2	[colt - congested-like trachea, CG8026 - cg8026 gene product from transcript cg8026-rd]
	GO:0044706	multi-multicellular organism process	1.04e-05	0.0741	14.44	7134	10	247	5	[CG17575 - cg17575 gene product from transcript cg17575-ra, lectin-46Cb - cg1652 gene product from transcript cg1652-ra, Pp1-13C - protein phosphatase 1 at 13c, lobo - lost boys, Est-6 - esterase 6]
	GO:0046692	sperm competition	1.04e-05	0.0371	14.44	7134	10	247	5	[CG17575 - cg17575 gene product from transcript cg17575-ra, lectin-46Cb - cg1652 gene product from transcript cg1652-ra, Pp1-13C - protein phosphatase 1 at 13c, lobo - lost boys, Est-6 - esterase 6]
	GO:0032504	multicellular organism reproduction	2.79e-05	0.066	4.47	7134	71	247	11	[CG6628 - cg6628 gene product from transcript cg6628-ra, CG17575 - cg17575 gene product from transcript cg17575-ra, lectin-46Cb - cg1652 gene product from transcript cg1652-ra, CG15695 - cg15695 gene product from transcript cg15695-ra, CG31496 - cg31496 gene product from transcript cg31496-ra, Est-6 - esterase 6, CG9988 - cg9988 gene product from transcript cg9988-ra, CG31515 - cg31515 gene produ…
	GO:0018401	peptidyl-proline hydroxylation to 4-hydroxy-L-proline	3.1e-05	0.055	12.03	7134	12	247	5	[CG31371 - cg31371 gene product from transcript cg31371-rc, PH4alphaNE1 - prolyl-4-hydroxylase-alpha ne1, CG15864 - cg15864 gene product from transcript cg15864-rb, CG9698 - cg9698 gene product from transcript cg9698-ra, CG31016 - cg31016 gene product from transcript cg31016-rb]
	GO:0019471	4-hydroxyproline metabolic process	3.1e-05	0.044	12.03	7134	12	247	5	[CG31371 - cg31371 gene product from transcript cg31371-rc, PH4alphaNE1 - prolyl-4-hydroxylase-alpha ne1, CG15864 - cg15864 gene product from transcript cg15864-rb, CG31016 - cg31016 gene product from transcript cg31016-rb, CG9698 - cg9698 gene product from transcript cg9698-ra]
	GO:0019511	peptidyl-proline hydroxylation	3.1e-05	0.0367	12.03	7134	12	247	5	[CG31371 - cg31371 gene product from transcript cg31371-rc, PH4alphaNE1 - prolyl-4-hydroxylase-alpha ne1, CG15864 - cg15864 gene product from transcript cg15864-rb, CG31016 - cg31016 gene product from transcript cg31016-rb, CG9698 - cg9698 gene product from transcript cg9698-ra]
	GO:0000003	reproduction	4.15e-05	0.0421	4.29	7134	74	247	11	[CG6628 - cg6628 gene product from transcript cg6628-ra, CG17575 - cg17575 gene product from transcript cg17575-ra, lectin-46Cb - cg1652 gene product from transcript cg1652-ra, CG15695 - cg15695 gene product from transcript cg15695-ra, CG31496 - cg31496 gene product from transcript cg31496-ra, Est-6 - esterase 6, CG9988 - cg9988 gene product from transcript cg9988-ra, CG31515 - cg31515 gene produ…
	GO:0018126	protein hydroxylation	7.4e-05	0.0656	10.32	7134	14	247	5	[CG31371 - cg31371 gene product from transcript cg31371-rc, PH4alphaNE1 - prolyl-4-hydroxylase-alpha ne1, CG15864 - cg15864 gene product from transcript cg15864-rb, CG9698 - cg9698 gene product from transcript cg9698-ra, CG31016 - cg31016 gene product from transcript cg31016-rb]
	GO:0044703	multi-organism reproductive process	0.000153	0.12	9.03	7134	16	247	5	[CG17575 - cg17575 gene product from transcript cg17575-ra, lectin-46Cb - cg1652 gene product from transcript cg1652-ra, Pp1-13C - protein phosphatase 1 at 13c, lobo - lost boys, Est-6 - esterase 6]
	GO:0006575	cellular modified amino acid metabolic process	0.000171	0.121	4.41	7134	59	247	9	[CG5122 - cg5122 gene product from transcript cg5122-ra, CG31371 - cg31371 gene product from transcript cg31371-rc, PH4alphaNE1 - prolyl-4-hydroxylase-alpha ne1, CG7560 - cg7560 gene product from transcript cg7560-ra, GstE13 - glutathione s transferase e13, pug - pugilist, CG15864 - cg15864 gene product from transcript cg15864-rb, CG9698 - cg9698 gene product from transcript cg9698-ra, CG31016 - …
	GO:0046008	regulation of female receptivity, post-mating	0.000759	0.49	14.44	7134	6	247	3	[CG17575 - cg17575 gene product from transcript cg17575-ra, lectin-46Cb - cg1652 gene product from transcript cg1652-ra, Est-6 - esterase 6]
	GO:1900426	positive regulation of defense response to bacterium	0.000963	0.57	6.28	7134	23	247	5	[grass - gram-positive specific serine protease, Tak1 - tgf-beta activated kinase 1, dgrn - degringolade, spheroide - cg9675 gene product from transcript cg9675-ra, PGRP-LC - peptidoglycan recognition protein lc]
	Dara upper dN/dS lower Dnig
	GO Term	Description	P-value	FDR q-value	Enrichment	N	B	n	b	Genes
	GO:0009620	response to fungus	0.000151	1	4.37	7134	40	367	9	[Hsp27 - heat shock protein 27, Spn27A - serpin 27a, grass - gram-positive specific serine protease, spz - spatzle, Fer2LCH - ferritin 2 light chain homologue, Trx-2 - thioredoxin-2, modSP - modular serine protease, spheroide - cg9675 gene product from transcript cg9675-ra, Obp99c - odorant-binding protein 99c]
	GO:0006760	folic acid-containing compound metabolic process	0.000213	0.756	11.11	7134	7	367	4	[CG7560 - cg7560 gene product from transcript cg7560-ra, l(3)72Dp - lethal (3) 72dp, pug - pugilist, CG34424 - cg34424 gene product from transcript cg34424-ra]
	GO:0006963	positive regulation of antibacterial peptide biosynthetic process	0.000373	0.881	5.83	7134	20	367	6	[grass - gram-positive specific serine protease, Tab2 - tak1-associated binding protein 2, spz - spatzle, ac - achaete, key - kenny, spheroide - cg9675 gene product from transcript cg9675-ra]
	GO:0002803	positive regulation of antibacterial peptide production	0.000373	0.661	5.83	7134	20	367	6	[grass - gram-positive specific serine protease, Tab2 - tak1-associated binding protein 2, spz - spatzle, ac - achaete, key - kenny, spheroide - cg9675 gene product from transcript cg9675-ra]
	GO:0050832	defense response to fungus	0.000525	0.745	4.69	7134	29	367	7	[Hsp27 - heat shock protein 27, Spn27A - serpin 27a, grass - gram-positive specific serine protease, spz - spatzle, Trx-2 - thioredoxin-2, modSP - modular serine protease, spheroide - cg9675 gene product from transcript cg9675-ra]
	GO:1900426	positive regulation of defense response to bacterium	0.000851	1	5.07	7134	23	367	6	[grass - gram-positive specific serine protease, Tab2 - tak1-associated binding protein 2, spz - spatzle, ac - achaete, key - kenny, spheroide - cg9675 gene product from transcript cg9675-ra]
	GO:0002786	regulation of antibacterial peptide production	0.000851	0.862	5.07	7134	23	367	6	[grass - gram-positive specific serine protease, Tab2 - tak1-associated binding protein 2, spz - spatzle, ac - achaete, key - kenny, spheroide - cg9675 gene product from transcript cg9675-ra]
	GO:0002808	regulation of antibacterial peptide biosynthetic process	0.000851	0.755	5.07	7134	23	367	6	[grass - gram-positive specific serine protease, Tab2 - tak1-associated binding protein 2, spz - spatzle, ac - achaete, key - kenny, spheroide - cg9675 gene product from transcript cg9675-ra]
	Dnig upper dN/dS lower Dara
	GO Term	Description	P-value	FDR q-value	Enrichment	N	B	n	b	Genes
	GO:0006662	glycerol ether metabolic process	0.000744	1	8.52	7134	9	372	4	[CG8517 - cg8517 gene product from transcript cg8517-ra, Dhap-at - dihydroxyacetone phosphate acyltransferase, Trx-2 - thioredoxin-2, CG3719 - cg3719 gene product from transcript cg3719-ra]
	GO:0018904	ether metabolic process	0.000744	1	8.52	7134	9	372	4	[CG8517 - cg8517 gene product from transcript cg8517-ra, Dhap-at - dihydroxyacetone phosphate acyltransferase, Trx-2 - thioredoxin-2, CG3719 - cg3719 gene product from transcript cg3719-ra]
	GO:1904893	negative regulation of STAT cascade	0.000357	1	11.02	7134	14	372	4	[Diedel - cg11501 gene product from transcript cg11501-ra, lig - lingerer, CG30423 - cg30423 gene product from transcript cg30423-rd, Socs36E - suppressor of cytokine signaling at 36e]
	GO:0046426	negative regulation of JAK-STAT cascade	0.000357	0.845	11.02	7134	14	372	4	[Diedel - cg11501 gene product from transcript cg11501-ra, lig - lingerer, CG30423 - cg30423 gene product from transcript cg30423-rd, Socs36E - suppressor of cytokine signaling at 36e]

## Sheet: Supplementary Table 7
Supplementary Table 7: Gene categories enriched for duplications on each branch of the D. dunni species phylogeny, relative to unduplicated genes.
	Dnig branch duplications
	GO Term	Description	P-value	FDR q-value	Enrichment	N	B	n	b	Genes
	GO:0060581	cell fate commitment involved in pattern specification	0.000201	1	20.04	6414	4	240	3	[EcR - ecdysone receptor, scrib - scribbled, abd-A - abdominal a]
	GO:0006814	sodium ion transport	0.000222	0.774	4.75	6414	45	240	8	[ppk6 - pickpocket 6, CG14239 - cg14239 gene product from transcript cg14239-rb, ppk29 - pickpocket 29, CG32792 - cg32792 gene product from transcript cg32792-rg, Nha2 - na[+]/h[+] hydrogen antiporter 2, NaCP60E - na channel protein 60e, Nckx30C - cg18660 gene product from transcript cg18660-rf, ppk28 - pickpocket 28]
	GO:0048806	genitalia development	0.000513	1	9.72	6414	11	240	4	[Dll - distal-less, abd-A - abdominal a, Btk29A - btk family kinase at 29a, salr - spalt-related]
	GO:0040011	locomotion	0.000749	1	2.02	6414	318	240	24	[EcR - ecdysone receptor, Pi3K68D - phosphotidylinositol 3 kinase 68d, sr - stripe, Shroom - cg34379 gene product from transcript cg34379-rd, pum - pumilio, lobo - lost boys, abd-A - abdominal a, cup - cg11181 gene product from transcript cg11181-rb, Ten-a - tenascin accessory, pain - painless, sesB - stress-sensitive b, Pvf3 - pdgf- and vegf-related factor 3, ttv - tout-velu, hiw - highwire, dys…
	GO:0016318	ommatidial rotation	0.000875	1	6.36	6414	21	240	5	[fred - friend of echinoid, ds - dachsous, cno - canoe, CadN - cadherin-n, pnt - pointed]
	GO:0006812	cation transport	0.000961	1	2.4	6414	178	240	16	[colt - congested-like trachea, CG14239 - cg14239 gene product from transcript cg14239-rb, pain - painless, Nckx30C - cg18660 gene product from transcript cg18660-rf, Vha14-2 - vacuolar h[+] atpase subunit 14-2, cngl - cng channel-like, ppk6 - pickpocket 6, CG42260 - cg42260 gene product from transcript cg42260-rb, ppk29 - pickpocket 29, brv3 - brivido-3, CG32792 - cg32792 gene product from trans…
	GO:0048870	cell motility	0.000977	0.974	2.2	6414	231	240	19	[EcR - ecdysone receptor, Pi3K68D - phosphotidylinositol 3 kinase 68d, sr - stripe, Shroom - cg34379 gene product from transcript cg34379-rd, pum - pumilio, lobo - lost boys, abd-A - abdominal a, cup - cg11181 gene product from transcript cg11181-rb, Pvf3 - pdgf- and vegf-related factor 3, ttv - tout-velu, dys - dysfusion, sli - slit, CASK - cask ortholog, Fhos - cg42610 gene product from transcr…
	Dara branch duplications
	GO Term	Description	P-value	FDR q-value	Enrichment	N	B	n	b	Genes
	GO:0007608	sensory perception of smell	0.000103	0.721	4.16	6466	48	324	10	[Or59b - odorant receptor 59b, Or42b - odorant receptor 42b, Obp56g - odorant-binding protein 56g, rdgA - retinal degeneration a, Or59a - odorant receptor 59a, Or49a - odorant receptor 49a, Cam - calmodulin, Galpha49B - g protein alpha49b, Or67d - odorant receptor 67d, Obp83g - odorant-binding protein 83g]
	GO:0040011	locomotion	0.000276	0.964	1.93	6466	320	324	31	[EcR - ecdysone receptor, wun2 - wunen-2, Pi3K68D - phosphotidylinositol 3 kinase 68d, sr - stripe, pum - pumilio, Pen - pendulin, ttv - tout-velu, hiw - highwire, Src42A - src oncogene at 42a, rdgA - retinal degeneration a, sli - slit, Pkd2 - polycystic kidney disease gene-2, CASK - cask ortholog, stumps - cg31317 gene product from transcript cg31317-rc, Galpha49B - g protein alpha49b, VhaM8.9 -…
	GO:0035114	imaginal disc-derived appendage morphogenesis	0.000378	0.879	2.51	6466	135	324	17	[EcR - ecdysone receptor, ftz-f1 - ftz transcription factor 1, fw - furrowed, bi - bifid, ds - dachsous, RhoGAP19D - cg1412 gene product from transcript cg1412-rb, CG30456 - cg30456 gene product from transcript cg30456-rb, Dll - distal-less, dan - distal antenna, Src42A - src oncogene at 42a, cg - combgap, Fhos - cg42610 gene product from transcript cg42610-ri, fry - furry, ed - echinoid, trio - …
	GO:0060581	cell fate commitment involved in pattern specification	0.00048	0.838	14.97	6466	4	324	3	[EcR - ecdysone receptor, scrib - scribbled, abd-A - abdominal a]
	GO:0045752	positive regulation of Toll signaling pathway	0.000569	0.794	5.44	6466	22	324	6	[Doa - darkener of apricot, grass - gram-positive specific serine protease, pip - pipe, ea - easter, smt3 - cg4494 gene product from transcript cg4494-ra, modSP - modular serine protease]
	GO:0035107	appendage morphogenesis	0.000631	0.733	2.41	6466	141	324	17	[EcR - ecdysone receptor, ftz-f1 - ftz transcription factor 1, fw - furrowed, ds - dachsous, bi - bifid, RhoGAP19D - cg1412 gene product from transcript cg1412-rb, CG30456 - cg30456 gene product from transcript cg30456-rb, Dll - distal-less, dan - distal antenna, Src42A - src oncogene at 42a, cg - combgap, Fhos - cg42610 gene product from transcript cg42610-ri, fry - furry, ed - echinoid, trio - …
	GO:0050911	detection of chemical stimulus involved in sensory perception of smell	0.000685	0.683	3.99	6466	40	324	8	[Or59b - odorant receptor 59b, Snmp1 - sensory neuron membrane protein 1, Or42b - odorant receptor 42b, Or94b - odorant receptor 94b, Or59a - odorant receptor 59a, Or49a - odorant receptor 49a, Or67d - odorant receptor 67d, Or42a - odorant receptor 42a]
	GO:0035120	post-embryonic appendage morphogenesis	0.000722	0.63	2.46	6466	130	324	16	[EcR - ecdysone receptor, ftz-f1 - ftz transcription factor 1, fw - furrowed, bi - bifid, ds - dachsous, RhoGAP19D - cg1412 gene product from transcript cg1412-rb, CG30456 - cg30456 gene product from transcript cg30456-rb, Dll - distal-less, Src42A - src oncogene at 42a, cg - combgap, Fhos - cg42610 gene product from transcript cg42610-ri, fry - furry, ed - echinoid, trio - cg18214 gene product f…
	GO:0003008	system process	0.000751	0.582	1.78	6466	369	324	33	[Dhc36C - dynein heavy chain at 36c, EcR - ecdysone receptor, Or59b - odorant receptor 59b, Ank2 - ankyrin 2, scrib - scribbled, pum - pumilio, Rh2 - rhodopsin 2, Or59a - odorant receptor 59a, gry - gryzun, hiw - highwire, Or42b - odorant receptor 42b, CAP - cg18408 gene product from transcript cg18408-ri, D2R - dopamine 2-like receptor, rdgA - retinal degeneration a, sif - still life, Pkd2 - pol…
	GO:0055088	lipid homeostasis	0.000839	0.585	3.52	6466	51	324	9	[EcR - ecdysone receptor, SNF4Agamma - snf4/amp-activated protein kinase gamma subunit, Snmp1 - sensory neuron membrane protein 1, bmm - brummer, ftz-f1 - ftz transcription factor 1, Sap-r - saposin-related, dm - diminutive, InR - insulin-like receptor, smt3 - cg4494 gene product from transcript cg4494-ra]
	Dara duplications
	GO Term	Description	P-value	FDR q-value	Enrichment	N	B	n	b	Genes
	GO:0060581	cell fate commitment involved in pattern specification	0.000189	1	20.46	6411	4	235	3	[EcR - ecdysone receptor, scrib - scribbled, abd-A - abdominal a]
	GO:0040011	locomotion	0.000217	0.756	2.15	6411	317	235	25	[EcR - ecdysone receptor, Pi3K68D - phosphotidylinositol 3 kinase 68d, sr - stripe, pum - pumilio, sesB - stress-sensitive b, ttv - tout-velu, hiw - highwire, sli - slit, CASK - cask ortholog, stumps - cg31317 gene product from transcript cg31317-rc, Galpha49B - g protein alpha49b, Rab7 - cg5915 gene product from transcript cg5915-ra, Shroom - cg34379 gene product from transcript cg34379-rd, lobo…
	GO:0048806	genitalia development	0.000474	1	9.92	6411	11	235	4	[Dll - distal-less, abd-A - abdominal a, Btk29A - btk family kinase at 29a, salr - spalt-related]
	GO:0048870	cell motility	0.000761	1	2.24	6411	231	235	19	[EcR - ecdysone receptor, Pi3K68D - phosphotidylinositol 3 kinase 68d, sr - stripe, Shroom - cg34379 gene product from transcript cg34379-rd, pum - pumilio, lobo - lost boys, abd-A - abdominal a, cup - cg11181 gene product from transcript cg11181-rb, Pvf3 - pdgf- and vegf-related factor 3, ttv - tout-velu, dys - dysfusion, sli - slit, CASK - cask ortholog, Fhos - cg42610 gene product from transcr…
	GO:0016477	cell migration	0.000806	1	2.29	6411	214	235	18	[EcR - ecdysone receptor, Pi3K68D - phosphotidylinositol 3 kinase 68d, sr - stripe, Shroom - cg34379 gene product from transcript cg34379-rd, pum - pumilio, abd-A - abdominal a, cup - cg11181 gene product from transcript cg11181-rb, Pvf3 - pdgf- and vegf-related factor 3, ttv - tout-velu, dys - dysfusion, sli - slit, CASK - cask ortholog, Fhos - cg42610 gene product from transcript cg42610-ri, ci…
	GO:0006812	cation transport	0.000923	1	2.41	6411	181	235	16	[colt - congested-like trachea, CG14239 - cg14239 gene product from transcript cg14239-rb, Ca-alpha1T - ca[2+]-channel protein alpha[[1]] subunit t, pain - painless, Nckx30C - cg18660 gene product from transcript cg18660-rf, Vha14-2 - vacuolar h[+] atpase subunit 14-2, cngl - cng channel-like, ppk6 - pickpocket 6, CG42260 - cg42260 gene product from transcript cg42260-rb, ppk29 - pickpocket 29, b…
	Dnig duplications
	GO Term	Description	P-value	FDR q-value	Enrichment	N	B	n	b	Genes
	GO:0008037	cell recognition	1.52e-05	0.107	3.37	6732	90	355	16	[Dscam - down syndrome cell adhesion molecule, esn - espinas, Mmp2 - matrix metalloproteinase 2, ab - abrupt, Ten-a - tenascin accessory, lola - longitudinals lacking, Rho1 - cg8416 gene product from transcript cg8416-rb, eater - cg6124 gene product from transcript cg6124-rc, Pvf3 - pdgf- and vegf-related factor 3, trol - terribly reduced optic lobes, nrm - neuromusculin, sli - slit, Ptp99A - pro…
	GO:0090251	protein localization involved in establishment of planar polarity	3.65e-05	0.128	15.17	6732	5	355	4	[Shroom - cg34379 gene product from transcript cg34379-rd, ds - dachsous, Rho1 - cg8416 gene product from transcript cg8416-rb, VhaM8.9 - cg8444 gene product from transcript cg8444-ra]
	GO:0008038	neuron recognition	4.1e-05	0.0963	3.27	6732	87	355	15	[Dscam - down syndrome cell adhesion molecule, esn - espinas, Mmp2 - matrix metalloproteinase 2, ab - abrupt, lola - longitudinals lacking, Ten-a - tenascin accessory, Rho1 - cg8416 gene product from transcript cg8416-rb, Pvf3 - pdgf- and vegf-related factor 3, trol - terribly reduced optic lobes, nrm - neuromusculin, sli - slit, Ptp99A - protein tyrosine phosphatase 99a, CadN - cadherin-n, Galph…
	GO:0040011	locomotion	0.000396	0.698	1.87	6732	324	355	32	[wun2 - wunen-2, Pi3K68D - phosphotidylinositol 3 kinase 68d, sr - stripe, Mmp2 - matrix metalloproteinase 2, pum - pumilio, ab - abrupt, Pen - pendulin, ttv - tout-velu, hiw - highwire, csw - corkscrew, rdgA - retinal degeneration a, sli - slit, CG12395 - cg12395 gene product from transcript cg12395-ra, Pkd2 - polycystic kidney disease gene-2, CASK - cask ortholog, stumps - cg31317 gene product …
	GO:0048870	cell motility	0.000548	0.772	2.03	6732	234	355	25	[Pi3K68D - phosphotidylinositol 3 kinase 68d, wun2 - wunen-2, sr - stripe, Mmp2 - matrix metalloproteinase 2, pum - pumilio, ab - abrupt, ttv - tout-velu, csw - corkscrew, sli - slit, CG12395 - cg12395 gene product from transcript cg12395-ra, Pkd2 - polycystic kidney disease gene-2, CASK - cask ortholog, stumps - cg31317 gene product from transcript cg31317-rc, Rab7 - cg5915 gene product from tra…
	GO:0046693	sperm storage	0.000559	0.657	14.22	6732	4	355	3	[lobo - lost boys, Pkd2 - polycystic kidney disease gene-2, Est-6 - esterase 6]
	GO:0042461	photoreceptor cell development	0.000961	0.967	3.79	6732	40	355	8	[csw - corkscrew, Doa - darkener of apricot, sdt - stardust, ttk - tramtrack, CadN - cadherin-n, lola - longitudinals lacking, rg - rugose, pnt - pointed]
	GO:0016318	ommatidial rotation	0.000968	0.852	4.95	6732	23	355	6	[ds - dachsous, cno - canoe, CadN - cadherin-n, Tak1 - tgf-beta activated kinase 1, ed - echinoid, pnt - pointed]
	Ddun duplications
	GO Term	Description	P-value	FDR q-value	Enrichment	N	B	n	b	Genes
	GO:0007608	sensory perception of smell	0.000115	0.8	4.11	6469	49	321	10	[Or59b - odorant receptor 59b, Or42b - odorant receptor 42b, Obp56g - odorant-binding protein 56g, rdgA - retinal degeneration a, Or59a - odorant receptor 59a, Or49a - odorant receptor 49a, Cam - calmodulin, Galpha49B - g protein alpha49b, Or67d - odorant receptor 67d, Obp83g - odorant-binding protein 83g]
	GO:0003008	system process	0.000316	1	1.85	6469	370	321	34	[Dhc36C - dynein heavy chain at 36c, EcR - ecdysone receptor, Or59b - odorant receptor 59b, Ank2 - ankyrin 2, scrib - scribbled, pum - pumilio, Rh2 - rhodopsin 2, Or59a - odorant receptor 59a, gry - gryzun, hiw - highwire, Tm1 - tropomyosin 1, Or42b - odorant receptor 42b, CAP - cg18408 gene product from transcript cg18408-ri, D2R - dopamine 2-like receptor, rdgA - retinal degeneration a, sif - s…
	GO:0060581	cell fate commitment involved in pattern specification	0.000467	1	15.11	6469	4	321	3	[EcR - ecdysone receptor, scrib - scribbled, abd-A - abdominal a]
	GO:0040011	locomotion	0.000542	0.947	1.88	6469	321	321	30	[EcR - ecdysone receptor, wun2 - wunen-2, Pi3K68D - phosphotidylinositol 3 kinase 68d, pum - pumilio, Pen - pendulin, ttv - tout-velu, hiw - highwire, rdgA - retinal degeneration a, sli - slit, CG12395 - cg12395 gene product from transcript cg12395-ra, Pkd2 - polycystic kidney disease gene-2, CASK - cask ortholog, stumps - cg31317 gene product from transcript cg31317-rc, Galpha49B - g protein alp…
	GO:0050911	detection of chemical stimulus involved in sensory perception of smell	0.000764	1	3.93	6469	41	321	8	[Or59b - odorant receptor 59b, Snmp1 - sensory neuron membrane protein 1, Or42b - odorant receptor 42b, Or67a - odorant receptor 67a, Or59a - odorant receptor 59a, Or49a - odorant receptor 49a, Or67d - odorant receptor 67d, Or42a - odorant receptor 42a]
	GO:0035114	imaginal disc-derived appendage morphogenesis	0.000984	1	2.39	6469	135	321	16	[EcR - ecdysone receptor, fw - furrowed, ds - dachsous, bi - bifid, RhoGAP19D - cg1412 gene product from transcript cg1412-rb, CG30456 - cg30456 gene product from transcript cg30456-rb, Dll - distal-less, dan - distal antenna, cg - combgap, Exn - ephexin, Fhos - cg42610 gene product from transcript cg42610-ri, fry - furry, ed - echinoid, trio - cg18214 gene product from transcript cg18214-ra, pnt…

## Sheet: Supplementary Table 8
Supplementary Table 8: dN/dS statistics calculated using codeML for the entire dunni phylogeny and on each branch.
gene	all_dnds	all_dn	all_ds	ara_dnds	ara_dn	ara_ds	dun_dnds	dun_dn	dun_ds	nig_dnds	nig_dn	nig_ds	sim_dnds	sim_dn	sim_ds	cat
maker-2_E_3R-augustus-gene-106.50	0.3458	0.2848	0.8237	0.0001	0	0.0079	0.427	0.0036	0.0084	0.1207	0.0018	0.0146	0.1192	0.0031	0.026	AG-biased
maker-2_E_3R-snap-gene-81.200	0.1085	3.1181	28.7375	0.0219	0.0006	0.0258	0.0156	0.0004	0.0287	0.0269	0.0005	0.0195	0.0329	0.0008	0.024	AG-biased
maker-4_B_2L-augustus-gene-79.77	0.2158	0.1216	0.5636	0.0001	0	0.0049	0.6435	0.005	0.0077	0.184	0.0017	0.0094	0.1057	0.0013	0.0125	AG-biased
maker-4_B_2L-augustus-gene-82.97	0.0721	0.0285	0.3945	0.0001	0	0.0033	0.1399	0.0025	0.018	0.0001	0	0	0.0001	0	0.0243	AG-biased
augustus_masked-4_B_2L-processed-gene-18.6	0.2973	0.246	0.8272	0.1657	0.074	0.4467	0.1112	0.1235	1.1108	0.3314	0.2565	0.7741	0.1112	0.1235	1.1108	AG-biased
maker-4_B_2L-augustus-gene-20.86	0.432	0.4387	1.0154	0.0001	0	0.0079	0.3376	0.0056	0.0166	0.1125	0.0024	0.0215	0.9869	0.0096	0.0098	AG-biased
maker-4_B_2L-snap-gene-19.116	0.1008	0.0153	0.1515	0.3955	0.0031	0.0078	0.0001	0	0	0.0001	0	0.0162	0.0001	0	0	AG-biased
maker-1_C_2R-augustus-gene-9.119	1.0631	0.7974	0.7501	2.7	0.0054	0.002	0.1495	0.0259	0.1731	0.1071	0.0055	0.0515	0.2875	0.0042	0.0148	AG-biased
maker-0_D_3L-snap-gene-54.115	0.0177	0.9025	51.0692	0.0001	0	0.0163	0.0001	0	0.0295	0.0001	0	0.0112	0.0001	0	0.0409	AG-biased
maker-0_D_3L-augustus-gene-75.100	0.1322	0.0282	0.2132	0.0646	0.0008	0.0129	0.1241	0.002	0.016	0.0001	0	0.0074	0.0707	0.0023	0.0332	AG-biased
maker-0_D_3L-augustus-gene-20.95	0.1168	0.0676	0.5787	0.0944	0.0012	0.0129	0.0653	0.0017	0.0264	0.0429	0.0012	0.027	0.0928	0.0023	0.0251	AG-biased
maker-2_E_3R-augustus-gene-87.77	0.0539	2.8987	53.7715	0.0932	0.0011	0.0117	0.0618	0.002	0.0317	0.0336	0.0007	0.0204	0.0158	0.0005	0.0329	AG-biased
maker-2_E_3R-augustus-gene-38.164	0.084	0.0363	0.4321	0.0502	0.0008	0.0158	0.0936	0.0029	0.0307	0.0486	0.0013	0.0277	0.0708	0.0014	0.0197	AG-biased
maker-2_E_3R-augustus-gene-22.116	0.1003	1.362	13.5787	0.0001	0	0.0071	0.0001	0	0.0106	0.0415	0.0006	0.015	0.1914	0.0025	0.0129	AG-biased
maker-4_B_2L-augustus-gene-34.172	0.0419	0.1516	3.6155	0.0266	0.0014	0.0526	0.2639	0.0043	0.0163	0.0001	0	0.0246	1.05	0.0021	0.002	AG-biased
maker-0_D_3L-augustus-gene-45.96	0.086	0.0392	0.4559	0.0843	0.0018	0.0217	0.099	0.004	0.0404	0.0842	0.0015	0.0178	0.0495	0.0019	0.0376	AG-biased
maker-0_D_3L-snap-gene-51.198	0.1947	2.747	14.1066	0.1751	0.0025	0.0145	0.0001	0	0	0.1043	0.0012	0.0119	0.0001	0	0	AG-biased
maker-0_D_3L-snap-gene-20.123	0.1168	0.0736	0.6305	0.1864	0.001	0.0053	0.5	0.001	0.002	0.0001	0	0.0069	1.0218	0.001	0.001	AG-biased
maker-4_B_2L-augustus-gene-66.95	0.0261	0.0107	0.4097	0.0001	0	0.0111	0.0001	0	0.0115	0.0001	0	0.0159	0.0001	0	0.0179	AG-biased
maker-0_D_3L-augustus-gene-45.90	0.0282	0.0091	0.3216	0.0001	0	0.0256	0.0215	0.0008	0.0385	0.0001	0	0.0253	0.0001	0	0.0221	AG-biased
maker-5_U_U-augustus-gene-20.64	0.0188	0.0091	0.4872	0.039	0.0009	0.0232	0.0001	0	0	0.0182	0.0005	0.0249	0.0001	0	0	AG-biased
augustus_masked-2_E_3R-processed-gene-90.5	0.0698	0.5565	7.9687	0.0135	0.0006	0.0421	0.2515	0.0116	0.0463	0.0001	0	0.0241	0.0607	0.001	0.0163	AG-biased
maker-2_E_3R-augustus-gene-22.130	0.4891	1.7474	3.5723	0.0001	0	0	0.138	0.0022	0.0161	0.5768	0.0058	0.0101	0.6004	0.0031	0.0052	AG-biased
augustus_masked-4_B_2L-processed-gene-81.0	0.3725	0.2514	0.6749	0.2989	0.2797	0.9358	0.2655	0.0054	0.0204	0.2406	0.0324	0.1345	1	0.002	0.002	AG-biased
maker-0_D_3L-augustus-gene-43.92	0.1474	0.0794	0.5386	0.1788	0.0021	0.0116	0.0876	0.0031	0.0358	0.0982	0.0031	0.0312	0.1512	0.006	0.0397	AG-biased
maker-2_E_3R-snap-gene-31.76	0.1467	0.0746	0.5084	0.0001	0	0.0135	0.1786	0.006	0.0335	0.0858	0.0011	0.0131	0.022	0.0005	0.0206	AG-biased
maker-2_E_3R-augustus-gene-63.110	0.0199	0.0002	0.0099	0.0001	0	0.0015	0.0001	0	0.0924	0.0001	0	0.0214	0.0001	0	0.0924	AG-biased
maker-4_B_2L-augustus-gene-85.62	0.298	0.2119	0.7111	0.4393	0.0019	0.0043	0.0001	0	0.0399	0.0387	0.0009	0.0232	0.0494	0.0027	0.0551	AG-biased
maker-4_B_2L-augustus-gene-43.78	0.1602	0.1025	0.64	0.0001	0	0.0114	0.1626	0.0031	0.0191	0.5786	0.003	0.0052	0.0675	0.0021	0.0316	AG-biased
maker-2_E_3R-augustus-gene-31.59	0.1966	0.0208	0.1059	0.1693	0.001	0.0061	0.2401	0.015	0.0623	0.1213	0.0024	0.0196	0.2401	0.015	0.0623	AG-biased
maker-4_B_2L-snap-gene-40.157	0.0557	0.0292	0.5232	0.0758	0.0014	0.018	0.0001	0	0.0146	0.0001	0	0.0166	0.0001	0	0.0574	AG-biased
maker-0_D_3L-augustus-gene-62.135	0.1697	1.7309	10.1984	0.0754	0.0018	0.0235	0.2328	0.0028	0.012	0.1207	0.0023	0.019	0.1653	0.0028	0.0171	AG-biased
maker-3_A_X-augustus-gene-70.106	0.0371	0.0142	0.382	0.0001	0	0.0024	0.0001	0	0.0107	0.0305	0.0006	0.0205	0.1025	0.0013	0.0127	AG-biased
maker-2_E_3R-augustus-gene-12.48	0.0612	0.0264	0.431	0.1311	0.0008	0.0059	0.0862	0.0013	0.0151	0.316	0.0023	0.0072	0.0001	0	0.0267	AG-biased
maker-0_D_3L-augustus-gene-40.126	0.1078	0	0	0.0001	0	0.0227	0.0959	0.0184	0.1922	0.1365	0.0017	0.0121	0.0959	0.0184	0.1922	AG-biased
maker-2_E_3R-augustus-gene-71.108	0.453	0.8753	1.9321	0.1644	0.0072	0.0436	0.4847	0.0069	0.0143	0.0577	0.0031	0.053	0.7186	0.008	0.0111	AG-biased
augustus_masked-1_C_2R-processed-gene-47.19	0.3049	0.0393	0.1289	0.0001	0	0.0026	0.8955	0.0357	0.0398	0.056	0.0015	0.0275	18.1	0.0362	0.002	AG-biased
maker-2_E_3R-snap-gene-53.132	0.071	0.0017	0.0241	0.0001	0	0.0028	0.1112	0.0038	0.0342	0.4256	0.0033	0.0077	0.0001	0	0.0175	AG-biased
maker-4_B_2L-augustus-gene-12.48	0.0184	1.1147	60.6675	0.0001	0	0.0354	0.0001	0	0.0151	0.0001	0	0.0305	0.0001	0	0.0046	AG-biased
maker-5_U_U-augustus-gene-19.72	0.2268	0.0457	0.2015	0.3336	0.002	0.0061	0.0001	0	0	0.0001	0	0.0074	0.0001	0	0	AG-biased
maker-3_A_X-augustus-gene-56.94	0.0548	0	0	0.0618	0.0049	0.0791	0.061	0.0098	0.1615	0.0001	0	0.0523	NA	NA	NA	AG-biased
maker-3_A_X-snap-gene-99.49	0.1537	0.0992	0.6455	0.1299	0.0009	0.0069	0.0001	0	0	0.5	0.001	0.002	0.0001	0	0	BG
maker-1_C_2R-augustus-gene-49.60	1.4078	17.9416	12.7449	0.1622	0	0	0.0001	0	0	0.0001	0	0	0.0001	0	0	BG
maker-4_B_2L-augustus-gene-17.6	0.302	0.8767	2.9028	0.2734	0.0064	0.0233	0.0001	0	0.0194	0.1394	0.007	0.0501	0.0001	0	0.0266	BG
maker-4_B_2L-snap-gene-70.218	0.1435	0.0937	0.6527	0.0538	0.0008	0.0154	0.3587	0.0023	0.0065	0.1203	0.0009	0.0077	0.079	0.0022	0.0281	BG
maker-4_B_2L-augustus-gene-83.99	0.0177	1.0626	60.1498	0.0001	0	0.0186	0.0678	0.001	0.0141	0.0001	0	0.014	0.0001	0	0.0031	BG
maker-2_E_3R-augustus-gene-58.129	0.0146	0.9004	61.6105	0.0001	0	0.0195	0.0001	0	0.0048	0.0001	0	0	0.0001	0	0	BG
maker-3_A_X-augustus-gene-59.112	0.1168	5.6161	48.0808	0.145	0.005	0.0346	0.0447	0.0018	0.0403	0.1796	0.0045	0.0249	0.0001	0	0.0187	BG
augustus_masked-4_B_2L-processed-gene-9.10	0.1994	0.1374	0.6889	0.082	0.0015	0.0188	0.0001	0	0.0123	0.0001	0	0.0261	0.2602	0	0	BG
maker-2_E_3R-augustus-gene-63.125	0.0174	1.0514	60.4275	0.0001	0	0.0135	0.0184	0.0007	0.0406	0.0001	0	0.0328	0.0324	0.0015	0.0462	BG
maker-3_A_X-augustus-gene-75.112	0.0646	0.0161	0.2492	0.0001	0	0.01	0.0001	0	0	0.1711	0.0017	0.01	0.1859	0	0	BG
augustus_masked-1_C_2R-processed-gene-13.8	0.0959	0.0422	0.4405	0.0001	0	0.015	0.0001	0	0	0.1313	0.0019	0.0142	0.5863	0	0	BG
maker-0_D_3L-augustus-gene-33.113	0.0256	0.0118	0.4597	0.0576	0.0007	0.0124	0.2349	0.0007	0.003	0.0001	0	0.0143	0.0001	0	0.0128	BG
maker-3_A_X-augustus-gene-71.88	0.2387	0.1286	0.5386	0.6257	0.003	0.0048	0.0001	0	0.0214	0.3131	0.0063	0.0201	0.0001	0	0.0226	BG
maker-1_C_2R-augustus-gene-44.167	0.0853	4.3474	50.9377	0.0001	0	0.0086	0.0001	0	0.0069	0.0001	0	0.0239	0.1272	0.001	0.0076	BG
maker-0_D_3L-augustus-gene-46.12	0.0222	1.4179	63.7564	0.1075	0.001	0.009	0.0001	0	0	0.0001	0	0.0168	0.0001	0	0	BG
maker-2_E_3R-augustus-gene-70.80	0.0945	1.4406	15.2374	0.4779	0.0037	0.0078	0.0752	0.0017	0.0224	0.0001	0	0.0074	0.0493	0.0008	0.0163	BG
maker-0_D_3L-augustus-gene-45.93	0.3088	0.1391	0.4506	0.2207	0.0014	0.0064	0.3249	0.0042	0.0128	0.0268	0.0002	0.0078	0.3036	0.0047	0.0155	BG
maker-1_C_2R-snap-gene-3.134	0.0111	0.0158	1.4216	0.0001	0	0.0041	0.0001	0	0	0.0001	0	0.0084	0.0001	0	0	BG
maker-3_A_X-snap-gene-18.89	0	0	0.2572	NA	NA	NA	NA	NA	NA	NA	NA	NA	NA	NA	NA	BG
maker-68_U_U-augustus-gene-0.4	0.0981	0.0688	0.7008	0.1387	0.0027	0.0192	0.08	0.0018	0.0228	0.0415	0.0007	0.0161	0.0538	0.002	0.0369	BG
augustus_masked-3_A_X-processed-gene-18.13	0.1731	0.1503	0.8682	0.051	0.0006	0.0125	0.35	0.0007	0.002	0.042	0.0013	0.0312	2.0333	0	0	BG
maker-3_A_X-snap-gene-23.129	0.0298	0.763	25.6037	0.0001	0	0	0.0001	0	0	0.0001	0	0.018	0.0001	0	0	BG
maker-1_C_2R-augustus-gene-12.122	0.0141	0.8026	57.0706	0.0001	0	0.0132	0.0001	0	0	0.0001	0	0.0246	0.0001	0	0.0135	BG
maker-1_C_2R-augustus-gene-39.172	0.1701	0.0916	0.5385	0.103	0.0018	0.0178	0.3096	0.0009	0.003	0.0909	0.0008	0.0083	0.317	0.0018	0.0056	BG
snap_masked-0_D_3L-processed-gene-49.90	0.0936	0.029	0.3102	0.0001	0	0	0.0001	0	0.0094	0.0001	0	0.0114	0.2631	0.0091	0.0345	BG
maker-1_C_2R-augustus-gene-60.138	0.3021	0.1975	0.6537	0.6081	0.0072	0.0118	0.0999	0	0	0.0001	0	0.0121	0.273	0	0	BG
maker-0_D_3L-augustus-gene-61.89	0.0686	0.0405	0.59	0.0001	0	0.0098	0.0001	0	0.0409	0.0717	0.0019	0.0267	0.0814	0.0039	0.0478	BG
snap_masked-3_A_X-processed-gene-22.45	0.2105	0.0639	0.3037	0.0001	0	0.0181	0.228	0.0038	0.0169	0.0609	0.001	0.0163	0.4109	0.0056	0.0137	BG
augustus_masked-1_C_2R-processed-gene-16.17	0.088	0.0722	0.82	0.0001	0	0.007	0.0216	0.0009	0.0413	0.0542	0.0014	0.0259	0.0133	0.0005	0.0363	BG
maker-2_E_3R-augustus-gene-21.122	0.0773	0.0295	0.3818	0.0504	0.0007	0.013	0.0224	0.0006	0.0272	0.0001	0	0.0082	0.0001	0	0.023	BG
maker-2_E_3R-augustus-gene-0.44	0.3254	0.4008	1.2318	0.4648	0	0	0.3791	0	0	0.4377	0	0	3.75	0.0075	0.002	BG
maker-0_D_3L-augustus-gene-47.118	0.3462	2.0421	5.8978	0.1004	0.0022	0.0218	0.0001	0	0	0.2599	0.0061	0.0236	0.0001	0	0	BG
maker-1_C_2R-augustus-gene-25.112	0.2823	10.3706	36.7302	0.0001	0	0.005	0.0001	0	0.0033	0.0001	0	0.0092	0.0001	0	0.0033	BG
snap_masked-4_B_2L-processed-gene-86.44	0.3129	0.0247	0.0789	0.0001	0	0.0154	0.4674	0.0276	0.059	0.5751	0.0091	0.0159	NA	NA	NA	BG
augustus_masked-0_D_3L-processed-gene-60.14	0.2415	0.11	0.4552	0.5305	0.0031	0.0059	0.095	0.0044	0.046	0.1312	0.0023	0.0174	0.2288	0.0075	0.0326	BG
maker-3_A_X-augustus-gene-62.77	0.2154	0.1165	0.5409	0.0587	0.0016	0.0266	0.1563	0.0071	0.0457	0.0498	0.0007	0.0149	0.1483	0.0063	0.0428	BG
maker-2_E_3R-snap-gene-35.173	0.1457	0.0465	0.3195	0.3204	0	0	4	0.008	0.002	0.306	0.004	0.0131	0.0001	0	0.0119	BG
maker-1_C_2R-augustus-gene-44.164	0.3033	0.2593	0.855	0.0001	0	0.028	0.0062	0.0004	0.0713	0.0001	0	0.0138	0.0001	0	0.06	BG
maker-3_A_X-augustus-gene-50.67	0.0814	0.0368	0.4521	0.0001	0	0.0154	0.1146	0.002	0.0172	0.0001	0	0	0.0547	0.002	0.0362	BG
snap_masked-2_E_3R-processed-gene-34.26	0.1412	5.2798	37.3911	0.1134	0.0008	0.0071	0.1756	0.0008	0.0046	0.1104	0.0016	0.0147	0.2675	0.0027	0.0102	BG
maker-4_B_2L-snap-gene-56.178	0.1145	0.0652	0.5692	0.1678	0.0024	0.0142	0.0522	0.0017	0.0334	0.0413	0.0012	0.0293	0.0226	0.0006	0.0246	BG
maker-2_E_3R-snap-gene-86.189	13.2431	4.2574	0.3215	0.4661	0	0	0.7319	0.0363	0.0496	0.3903	0	0	0.3718	0.0218	0.0587	BG
maker-1_C_2R-snap-gene-28.136	0.4944	0.0773	0.1563	0.168	0.0065	0.039	0.822	0.0722	0.0879	0.0001	0	0	0.822	0.0722	0.0879	BG
maker-1_C_2R-augustus-gene-67.115	0.0206	1.116	54.0513	0.0001	0	0.0138	0.0001	0	0.0062	0.0001	0	0.0282	0.0001	0	0.0216	BG
augustus_masked-0_D_3L-processed-gene-35.34	0.2037	0.1335	0.6552	0.0422	0.0014	0.0331	1.7645	0	0	0.0381	0.0014	0.0363	0.8846	0	0	BG
maker-2_E_3R-augustus-gene-20.97	0.1452	0.0747	0.5145	0.0944	0.0009	0.0096	0.1802	0.0015	0.0086	0.0125	0.0002	0.0142	0.1199	0.0011	0.0088	BG
maker-0_D_3L-augustus-gene-83.63	0.3536	0.144	0.4072	12.2438	0.0008	0.0001	0.0697	0.002	0.0282	0.0974	0.0008	0.0083	0.0967	0.0017	0.0179	BG
augustus_masked-0_D_3L-processed-gene-20.17	0.1574	0.0064	0.0405	0.0282	0.0006	0.0197	0.117	0.0085	0.0731	0.073	0.0017	0.0229	0.117	0.0085	0.0731	BG
maker-0_D_3L-augustus-gene-38.144	0.0244	1.4405	59.1041	0.1428	0.0004	0.0028	0.0001	0	0.0124	0.0001	0	0.006	0.0542	0.0008	0.0149	BG
maker-3_A_X-snap-gene-81.65	0.6768	0.4036	0.5962	0.0001	0	0.0112	0.1328	0.0041	0.0312	0.0001	0	0.017	0.1361	0.0027	0.0201	BG
maker-3_A_X-snap-gene-33.189	0.4124	0.6843	1.6593	0.0672	0.0008	0.0122	0.0001	0	0.0065	0.2609	0.0041	0.0158	0.0001	0	0.0032	BG
maker-2_E_3R-augustus-gene-105.85	0.0578	0.0436	0.754	0.0001	0	0.0141	0.0001	0	0.0125	0.0001	0	0.0304	0.0001	0	0.0216	BG
maker-4_B_2L-augustus-gene-47.118	0.0723	1.8997	26.2755	0.0471	0.0012	0.0258	0.0001	0	0	0.0638	0.0012	0.0181	0.0001	0	0	BG
augustus_masked-4_B_2L-processed-gene-25.6	0.0783	0.0208	0.266	0.4645	0	0	0.0001	0	0	0.0001	0	0.0119	0.0001	0	0.0238	BG
maker-0_D_3L-augustus-gene-18.148	0.0815	2.0939	25.7021	0.3705	0	0	0.6478	0.0029	0.0045	0.0001	0	0.0038	0.0001	0	0.009	BG
snap_masked-0_D_3L-processed-gene-2.50	0.19	5.761	30.3157	0.1423	0.0022	0.0152	0.3341	0.0035	0.0105	0.1387	0.0015	0.0107	0.0677	0.0017	0.025	BG
maker-2_E_3R-augustus-gene-89.133	0.0784	0.0672	0.8579	0.3461	0	0	0.0001	0	0.0052	0.0001	0	0.007	0.0001	0	0.0255	BG
maker-4_B_2L-snap-gene-48.125	0.0717	0.0237	0.3303	0.0001	0	0.0099	0.0001	0	0	0.1093	0.0008	0.0073	1.338	0	0	BG
snap_masked-1_C_2R-processed-gene-44.53	0.1196	0.1691	1.4141	0.087	0.0014	0.0161	3.45	0.0069	0.002	0.0192	0.0005	0.0238	0.0272	0.6409	23.525	BG
maker-3_A_X-snap-gene-85.58	0.1101	0.0261	0.2371	0.0001	0	0.0063	0.0364	0.0007	0.0199	0.0001	0	0.0053	0.1728	0.0016	0.009	BG
maker-0_D_3L-snap-gene-24.123	0.1276	1.8101	14.187	0.1186	0.0004	0.0035	0.0675	0.0021	0.031	0.154	0.0013	0.0086	0.0329	0.0008	0.0253	BG
maker-2_E_3R-augustus-gene-57.14	0.133	0.0077	0.0576	0.054	0.0005	0.0098	0.1379	0.0074	0.0534	0.0001	0	0.0057	0.1379	0.0074	0.0534	BG
maker-0_D_3L-augustus-gene-67.6	0.1409	2.364	16.7825	0.0001	0	0.0123	0.0893	0.0012	0.0131	0.0001	0	0.0042	0.0001	0	0.0366	BG
maker-4_B_2L-augustus-gene-8.44	0.0652	0.0207	0.3174	0.0001	0	0.0111	0.0001	0	0	0.0001	0	0	0.0001	0	0	BG
maker-2_E_3R-augustus-gene-99.118	0.0569	0.0217	0.3818	0.0278	0.0004	0.0155	1.2175	0.0007	0.0006	0.0847	0.0004	0.0051	0.0001	0	0	BG
maker-2_E_3R-snap-gene-61.150	0.1353	0.014	0.1031	0.0001	0	0.005	0.0001	0	0.0119	0.4749	0.0048	0.0101	0.0001	0	0.02	BG
maker-1_C_2R-snap-gene-62.155	0.1868	0.0985	0.527	0.0792	0.0016	0.0204	0.0468	0.0007	0.0148	0.0747	0.0019	0.0249	0.0889	0.0011	0.0121	BG
maker-4_B_2L-augustus-gene-52.115	0.3495	0.0774	0.2214	0.0001	0	0.005	0.5448	0.0051	0.0094	0.0001	0	0.0083	0.5947	0.0059	0.0099	BG
maker-0_D_3L-snap-gene-39.122	0.3191	4.0125	12.5753	0.2714	0.0008	0.0028	0.2249	0.0015	0.0068	0.1613	0.0023	0.0144	0.7904	0.0039	0.0049	BG
maker-1_C_2R-augustus-gene-62.112	0.1235	0.0892	0.7223	0.0816	0.0012	0.0142	0.0548	0.0026	0.0472	0.0855	0.0014	0.0162	0.0886	0.0026	0.0293	BG
maker-4_B_2L-augustus-gene-12.53	0.2733	1.7692	6.4739	0.101	0.0012	0.012	0.1057	0.0022	0.0209	0.0591	0.0009	0.0155	0.1851	0.0005	0.0025	BG
snap_masked-4_B_2L-processed-gene-57.35	0.0386	0.0086	0.2229	0.0001	0	0.017	0.0001	0	0.016	0.0001	0	0.0268	0.1628	0.0016	0.0097	BG
snap_masked-2_E_3R-processed-gene-36.60	0.2547	0.2165	0.8501	0.1081	0.0018	0.0166	0.057	0.0016	0.0278	3.0761	0.0052	0.0017	0.0206	0.0006	0.027	BG
maker-4_B_2L-augustus-gene-19.7	0.1023	0.7825	7.6479	1.9	0.0038	0.002	0.3121	0.0037	0.0118	0.0001	0	0.0114	0.2605	0	0	BG
snap_masked-1_C_2R-processed-gene-36.17	0.1452	0.0735	0.5065	0.0001	0	0.0064	0.0001	0	0.0375	0.0001	0	0.0122	0.0689	0.0014	0.0208	BG
maker-4_B_2L-augustus-gene-56.13	0.1145	2.0918	18.2708	0.0001	0	0.003	0.0791	0.0011	0.0137	0.3046	0.0032	0.0106	1.0318	0.0032	0.0031	BG
maker-0_D_3L-augustus-gene-31.118	0.058	1.6511	28.4582	0.1867	0.0009	0.0048	0.0001	0	0.0143	0.0001	0	0.017	0.0541	0.0011	0.0203	BG
maker-3_A_X-snap-gene-32.49	0.0238	0.0098	0.4127	0.0001	0	0.0217	0.053	0.0013	0.0246	0.0097	0.0002	0.0223	NA	NA	NA	BG
maker-0_D_3L-snap-gene-7.52	0.1534	0.0588	0.3835	0.0414	0.0005	0.0123	0.0639	0.002	0.0314	NA	NA	NA	0.075	0.0031	0.0413	BG
maker-2_E_3R-augustus-gene-89.159	0.1139	0.0783	0.6878	0.0447	0.0008	0.0175	0.1019	0.0024	0.0232	0.0001	0	0.0196	0.0755	0.0016	0.0208	BG
maker-1_C_2R-snap-gene-77.157	0.1926	0.1094	0.5684	0.0651	0.0011	0.0168	0.0001	0	0	0.0001	0	0.0186	0.0001	0	0.0011	BG
maker-2_E_3R-augustus-gene-13.106	0.0644	0.0417	0.6477	0.0279	0.0004	0.0158	0.0644	0.0022	0.0343	0.0001	0	0.0314	0.0428	0.0013	0.0309	BG
maker-2_E_3R-augustus-gene-49.115	0.2653	6.927	26.1062	0.0469	0.0005	0.0111	0.0001	0	0	0.0001	0	0.0226	0.0001	0	0	BG
augustus_masked-1_C_2R-processed-gene-74.4	0.1048	1.1281	10.7694	0.2636	0.001	0.0038	0.1531	0.0032	0.0209	0.1098	0.0031	0.0285	0.0822	0.0046	0.0556	BG
maker-0_D_3L-augustus-gene-31.114	0.2038	1.9368	9.5015	0.1753	0.0015	0.0087	0.0001	0	0.0179	0.1735	0.0015	0.0089	0.1689	0.0015	0.0089	BG
maker-4_B_2L-augustus-gene-60.7	0.3321	0.832	2.5049	0.0001	0	0.0057	0.0001	0	0	0.2038	0.0051	0.0249	0.0001	0	0	BG
maker-4_B_2L-augustus-gene-30.90	0.0184	0.0079	0.4274	0.0001	0	0.0154	0.0185	0.0007	0.0402	0.0487	0.0008	0.0156	0.0001	0	0.0252	BG
maker-4_B_2L-augustus-gene-49.	0.0251	0.0073	0.291	0.0976	0.0016	0.016	0.0001	0	0	0.0001	0	0	0.0001	0	0	BG
maker-1_C_2R-snap-gene-37.145	0.1284	0.3695	2.8775	0.0001	0	0.0456	0.0443	0	0	0.0001	0	0	0.2896	0	0	BG
maker-2_E_3R-augustus-gene-64.103	0.023	0.0075	0.3279	0.3704	0	0	0.0001	0	0.0231	0.0001	0	0.008	0.0001	0	0.0264	BG
augustus_masked-1_C_2R-processed-gene-44.4	0.1205	1.7681	14.6685	0.0898	0.0015	0.0165	0.0438	0.0015	0.0337	0.75	0.0015	0.002	0.0001	0	0.0312	BG
maker-332_U_U-augustus-gene-0.2	0.0522	0.2871	5.5002	0.3366	0	0	0.0001	0	0	0.0001	0	0.0127	0.0001	0	0	BG
snap_masked-4_B_2L-processed-gene-95.38	0.0438	0.0247	0.5633	0.0001	0	0.0136	0.0658	0.0025	0.0385	0.0499	0.0014	0.0274	0.0089	0	0.0038	BG
maker-1_C_2R-augustus-gene-32.73	0.088	0.0056	0.0635	0.0001	0	0.0101	0.0001	0	0.0325	0.0001	0	0.0088	0.0001	0	0.0316	BG
maker-2_E_3R-snap-gene-87.98	0.3455	1.0629	3.0759	0.605	0.0037	0.0062	0.0001	0	0.0228	0.0001	0	0.0263	0.0001	0	0.0062	BG
maker-4_B_2L-augustus-gene-28.80	0.1218	0.0867	0.7115	0.1015	0.0012	0.0116	0.0856	0.0038	0.0448	0.0429	0.0013	0.0296	0.1006	0.0038	0.0378	BG
augustus_masked-3_A_X-processed-gene-54.2	0.2578	0.2931	1.1368	0.0001	0	0.0165	0.4302	0.014	0.0325	0.0001	0	0.0132	0.0001	0	0.0181	BG
maker-2_E_3R-augustus-gene-78.112	0.1071	0.0356	0.332	1.15	0.0023	0.002	4.6	0.0092	0.002	0.0001	0	0	4.15	0.0083	0.002	BG
maker-6_F_4-augustus-gene-3.69	0.1839	0.123	0.6687	0.1757	0.002	0.0115	0.55	0.0011	0.002	0.2897	0.0019	0.0064	0.3672	0.0013	0.0035	BG
maker-2_E_3R-augustus-gene-46.118	0.024	1.5807	65.7562	0.2907	0	0	0.0001	0	0.0241	0.1814	0	0	0.0001	0	0.0122	BG
snap_masked-1_C_2R-processed-gene-64.67	0.1837	0.1154	0.6279	0.1224	0.0019	0.0153	0.1219	0.0042	0.0345	0.1474	0.0018	0.0123	0.0976	0.0037	0.0377	BG
maker-2_E_3R-augustus-gene-27.112	0.0702	0.0132	0.1874	0.6	0.0012	0.002	0.0001	0	0.0231	0.1212	0	0	0.0001	0	0.0083	BG
maker-4_B_2L-augustus-gene-28.8	0.2768	0.1409	0.5091	0.214	0.0027	0.0127	0.1003	0.0016	0.0164	0.5534	0.0048	0.0086	0.3558	0.0057	0.0159	BG
augustus_masked-4_B_2L-processed-gene-2.2	0.2775	0.0805	0.2902	0.4155	0	0	3.7	0.0074	0.002	0.1907	0	0	0.1547	0	0	BG
maker-1_C_2R-augustus-gene-15.113	0.2023	8.0185	39.6354	0.1821	0.0011	0.0062	0.0001	0	0	0.0487	0.0011	0.0234	0.0001	0	0	BG
maker-3_A_X-snap-gene-98.72	0.0649	0.0295	0.4549	0.0001	0	0.0117	0.3136	0.0024	0.0077	0.0359	0.0012	0.0329	0.6	0.0012	0.002	BG
maker-2_E_3R-snap-gene-100.115	0.0649	0.0172	0.2653	0.0001	0	0.0157	0.0248	0.0005	0.0211	0.0001	0	0.0092	0.0115	0.0005	0.0455	BG
maker-0_D_3L-augustus-gene-35.139	0.1944	0.1012	0.5205	0.0001	0	0.0051	0.2799	0.007	0.0252	0.3449	0.0066	0.0193	0.4261	0.0077	0.018	BG
snap_masked-2_E_3R-processed-gene-7.75	0.0418	0.0222	0.5323	0.0001	0	0.0195	0.0001	0	0.0323	0.0001	0	0.003	0.0001	0	0.0426	BG
maker-0_D_3L-augustus-gene-18.144	0.7921	0	0	0.0001	0	0.0065	0.0317	0.0011	0.0339	0.0001	0	0.0032	0.0317	0.0011	0.0339	BG
maker-3_A_X-augustus-gene-4.59	0.0273	1.1493	42.0231	0.0245	0.0004	0.0167	0.0366	0.6585	17.9851	0.0084	0.0002	0.0244	3.3221	0.0006	0.0002	BG
snap_masked-2_E_3R-processed-gene-58.4	0.0922	2.294	24.8903	0.0754	0.0011	0.0148	0.0001	0	0.0068	0.0001	0	0.0109	0.0437	0.0007	0.015	BG
maker-1_C_2R-augustus-gene-80.98	0.0254	0.0526	2.0704	0.0001	0	0.0115	0.0001	0	0	0.0011	0	0.0147	0.0001	0	0	BG
maker-1_C_2R-snap-gene-80.136	0.0148	0.0007	0.0461	0.0001	0	0	0.0001	0	0.0907	0.0001	0	0.0213	0.0001	0	0.0907	BG
maker-4_B_2L-augustus-gene-66.77	0.5002	0.0359	0.0718	0.4356	0.0072	0.0165	0.1353	0.011	0.0812	0.5201	0.0054	0.0104	0.1353	0.011	0.0812	BG
augustus_masked-0_D_3L-processed-gene-15.48	0.1131	0.0613	0.5416	0.072	0.0013	0.0176	0.2053	0.0008	0.0037	0.0455	0.0008	0.0175	0.4489	0.0013	0.0029	BG
augustus_masked-2_E_3R-processed-gene-3.7	0.0127	0.0089	0.6998	0.0001	0	0.0042	0.65	0.0013	0.002	0.0001	0	0.037	0.0001	0	0	BG
maker-4_B_2L-augustus-gene-55.70	0.1885	0.0737	0.3911	0.0001	0	0.0251	0.23	0.0082	0.0355	0.4157	0.0079	0.019	0.1242	0.0031	0.0249	BG
maker-4_B_2L-snap-gene-89.88	0.0212	0.9283	43.7583	0.0001	0	0.0194	0.0001	0	0.009	0.0001	0	0.0031	0.0001	0	0.0401	BG
maker-1_C_2R-augustus-gene-78.90	0.0278	1.5979	57.5002	0.0001	0	0.0324	0.0001	0	0	0.0772	0.0008	0.0098	0.0001	0	0	BG
augustus_masked-0_D_3L-processed-gene-47.15	0.1776	0.1299	0.7315	0.3426	0	0	0.0879	0.0023	0.0256	0.0001	0	0.0413	0.0001	0	0.032	BG
maker-5_U_U-augustus-gene-20.56	0.4234	1.5087	3.5632	0.6318	0.0038	0.006	0.0001	0	0	0.5848	0.0087	0.0148	0.0001	0	0	BG
maker-2_E_3R-snap-gene-64.125	0.2627	0.0977	0.3719	0.2938	0.0071	0.024	0.1321	0.0032	0.0242	0.2838	0.006	0.0211	0.0386	0.0018	0.046	BG
maker-2_E_3R-augustus-gene-88.65	0.0634	1.143	18.0337	0.0001	0	0.0258	0.0001	0	0.028	0.1324	0.0047	0.0354	0.0565	0.0024	0.042	BG
maker-1_C_2R-augustus-gene-48.7	0.1336	0.0263	0.1967	0.0001	0	0.0089	0.2575	0	0	0.2525	0.0019	0.0075	0.0001	0	0	BG
snap_masked-1_C_2R-processed-gene-57.50	0.0783	0.0345	0.4402	0.0001	0	0.0279	0.0416	0.0004	0.0094	0.0795	0.0018	0.0227	0.1507	0.0026	0.0172	BG
maker-0_D_3L-augustus-gene-36.164	0.0475	0.0186	0.392	0.0001	0	0.0031	0.0001	0	0	0.0001	0	0.0282	0.0001	0	0	BG
maker-0_D_3L-snap-gene-11.127	0.0452	0.0189	0.4171	0.011	0.0002	0.0184	0.0219	0.0007	0.0301	0.008	0.0001	0.0155	0.0001	0	0.032	BG
augustus_masked-3_A_X-processed-gene-81.10	0.0969	0.0818	0.8442	0.0095	0.0004	0.0395	0.0608	0.0017	0.0274	0.0193	0.0004	0.0217	0.0584	0.0018	0.03	BG
maker-0_D_3L-augustus-gene-43.100	0.0086	0.0009	0.1	0.0001	0	0.0044	0.3089	0	0	0.0001	0	0.0089	0.3007	0	0	BG
maker-0_D_3L-augustus-gene-37.134	0.3405	0.4572	1.3427	0.0034	0.0001	0.0351	0.0001	0	0.0052	0.0474	0.003	0.0639	4.6538	0	0	BG
maker-3_A_X-augustus-gene-81.43	0.4251	0.0396	0.093	0.0001	0	0.0031	0.2032	0.0019	0.0092	0.7	0.0014	0.002	0.0001	0	0.0039	BG
maker-4_B_2L-snap-gene-33.128	0.0555	0.0306	0.5516	0.131	0.0012	0.0094	0.0001	0	0.0093	0.0001	0	0.0048	0.0001	0	0.0034	BG
augustus_masked-4_B_2L-processed-gene-18.	0.0073	0.0001	0.02	0.0001	0	0.007	0.0001	0	0.0687	0.0001	0	0.0347	NA	NA	NA	BG
maker-3_A_X-snap-gene-30.109	0.0344	0.018	0.5248	0.0207	0.0005	0.0218	0.0632	0.0011	0.0179	0.0301	0.0007	0.0225	0.0094	0.0002	0.0241	BG
augustus_masked-1_C_2R-processed-gene-13.27	0.0157	0.9457	60.1203	0.0001	0	0.0062	0.0001	0	0.0035	0.0001	0	0	0.0001	0	0	BG
maker-0_D_3L-snap-gene-62.153	0.018	0.0046	0.2552	0.0001	0	0.0126	0.0001	0	0.0283	0.0141	0.0003	0.0229	0.0001	0	0.0385	BG
maker-3_A_X-augustus-gene-52.45	0.1835	0.0541	0.2949	0.1412	0.002	0.0143	0.8726	0.0045	0.0051	0.0001	0	0	2.1	0.0042	0.002	BG
maker-1_C_2R-augustus-gene-21.8	0.0402	2.0614	51.3168	0.35	0.0007	0.002	0.0335	0.001	0.0291	0.1497	0.0015	0.0098	0.0001	0	0.0215	BG
maker-3_A_X-augustus-gene-99.4	0.003	0.0015	0.5039	0.3304	0	0	0.385	0	0	0.3607	0	0	0.4654	0	0	BG
maker-0_D_3L-augustus-gene-73.148	0.0423	0.0235	0.5544	0.0329	0.0003	0.0078	0.0001	0	0.0213	0.0001	0	0.0112	0.0001	0	0.01	BG
maker-2_E_3R-augustus-gene-26.115	0.0702	0.0333	0.4751	0.1004	0.0012	0.0115	0.0001	0	0	0.0001	0	0.0148	0.2667	0	0	BG
augustus_masked-4_B_2L-processed-gene-32.2	0.177	0.0929	0.5248	0.0001	0	0.0192	0.0806	0.0048	0.0591	0.1319	0.0047	0.0353	0.0001	0	0.0126	BG
maker-3_A_X-augustus-gene-45.85	0.0966	0.0676	0.6995	0.1233	0.0025	0.0203	0.0001	0	0.0056	0.1036	0.0021	0.0202	0.0684	0.0019	0.0283	BG
maker-1_C_2R-augustus-gene-51.110	0.2628	0.0618	0.2352	0.0001	0	0.0041	0.0001	0	0.0234	0.0001	0	0.0086	0.0001	0	0.0233	BG
maker-0_D_3L-augustus-gene-69.69	0.017	0.0009	0.0507	0.0001	0	0.0016	0.0001	0	0.0271	0.0001	0	0.0095	0.0353	0.0005	0.0155	BG
maker-1_C_2R-augustus-gene-39.179	0.1201	0.0287	0.2392	2.85	0.0057	0.002	0.0001	0	0	0.0001	0	0.0042	0.0001	0	0	BG
maker-4_B_2L-augustus-gene-89.56	0.0712	0.0342	0.4805	0.0001	0	0.0063	0.0489	0.002	0.0407	0.141	0.001	0.0071	0.0662	0.002	0.03	BG
maker-1_C_2R-augustus-gene-79.117	0.0244	1.3663	55.9341	0.0001	0	0.0348	0.0001	0	0.0327	0.0001	0	0.0357	0.0001	0	0.0427	BG
maker-2_E_3R-snap-gene-46.169	0.1624	0.0913	0.5625	0.1617	0.0026	0.0158	0.162	0.0019	0.0115	0.0552	0.0012	0.0213	0.2176	0.0012	0.0055	BG
snap_masked-2_E_3R-processed-gene-60.69	0.0969	0.0365	0.377	0.1104	0.0009	0.0082	0.2065	0.0015	0.0074	0.177	0.0009	0.0051	0.0001	0	0.0145	BG
maker-4_B_2L-augustus-gene-53.109	0.069	3.7833	54.8569	0.1535	0.0006	0.0036	0.0001	0	0.0081	0.0001	0	0.0177	0.0001	0	0.0104	BG
maker-1_C_2R-snap-gene-39.228	0.2415	8.8939	36.8332	0.0001	0	0.0215	0.2841	0.0017	0.0059	0.0344	0.0008	0.0231	0.0859	0.0028	0.0327	BG
maker-1_C_2R-augustus-gene-19.117	0.2067	0.0487	0.2357	0.0855	0.0014	0.0161	0.0001	0	0.0072	0.0852	0.0013	0.0151	0.1779	0.0027	0.0152	BG
maker-5_U_U-snap-gene-6.8	0.0682	0.0219	0.3213	0.0356	0.0004	0.0104	0.0321	0.0006	0.0187	0.0258	0.0003	0.0133	0.1232	0.0012	0.0096	BG
snap_masked-4_B_2L-processed-gene-95.55	0.1718	0.1368	0.7961	0.0484	0.0015	0.0314	0.0016	0	0.0277	0.0837	0.0021	0.0247	0.0671	0.0021	0.0313	BG
augustus_masked-1_C_2R-processed-gene-24.3	0.1039	1.6322	15.7071	0.0478	0.5405	11.2985	0.108	0.0026	0.0238	33.473	0.006	0.0002	0.0403	0.0021	0.0514	BG
snap_masked-1_C_2R-processed-gene-15.8	0.1199	0.0457	0.3809	0.0739	0.0011	0.0155	0.1007	0.004	0.0392	0.045	0.0009	0.0209	0.1997	0.0058	0.0293	BG
maker-2_E_3R-augustus-gene-59.178	0.1772	0.0363	0.2049	0.449	0	0	0.1855	0	0	0.0001	0	0.0065	0.1109	0	0	BG
maker-4_B_2L-augustus-gene-13.44	0.3003	2.0441	6.8059	0.0001	0	0.005	0.0001	0	0.0825	0.0001	0	0.005	0.0457	0.005	0.1103	BG
maker-0_D_3L-snap-gene-45.106	0.0126	0.0068	0.5349	0.0001	0	0.0096	0.0223	0.0012	0.0521	0.0001	0	0.0309	0.0001	0	0.0398	BG
maker-4_B_2L-augustus-gene-30.98	0.0875	3.1835	36.3931	0.1155	0.0022	0.019	0.55	0.0011	0.002	0.1951	0.0019	0.0098	0.0001	0	0.0136	BG
snap_masked-4_B_2L-processed-gene-40.82	0.0738	0.035	0.4739	0.1287	0.0016	0.0123	0.036	0.0016	0.0452	0.0605	0.0012	0.0205	0.009	0.0005	0.0594	BG
maker-2_E_3R-augustus-gene-94.83	0.037	0.0295	0.7973	0.0001	0	0.0051	0.329	0.0009	0.0027	0.0001	0	0.0195	0.1203	0.0018	0.015	BG
maker-0_D_3L-snap-gene-78.87	1.5792	0.7574	0.4796	0.4245	0	0	0.4491	0	0	0.3897	0	0	0.3688	0	0	BG
maker-0_D_3L-augustus-gene-55.140	0.0171	1.1116	65.0736	0.0001	0	0.0102	0.0001	0	0.0369	0.0001	0	0.0177	0.0001	0	0.0411	BG
maker-0_D_3L-augustus-gene-58.70	0.019	0.0093	0.4882	0.0001	0	0.0204	0.0888	0.0011	0.0128	0.0228	0.0008	0.0332	0.0257	0.0004	0.0158	BG
maker-2_E_3R-augustus-gene-38.138	0.1566	0.0893	0.5701	0.5085	0.0055	0.0107	0.4646	0.0041	0.0089	0.0694	0.0018	0.0253	0.2408	0.0141	0.0585	BG
maker-2_E_3R-augustus-gene-35.139	0.1312	0.0823	0.6271	0.0669	0.0008	0.0126	0.0368	0.0013	0.0342	0.0418	0.0011	0.0254	0.0607	0.0018	0.0302	BG
maker-2_E_3R-augustus-gene-59.172	0.1341	0.0683	0.5093	0.0751	0.0006	0.0086	0.1293	0.0016	0.0125	0.3039	0.0016	0.0053	0.3403	0.0017	0.0051	BG
maker-3_A_X-augustus-gene-46.92	0.0837	0.0318	0.38	0.1759	0.0025	0.0144	0.0365	0.0013	0.0363	0.2046	0.0039	0.019	0.2358	0.0046	0.0195	BG
maker-4_B_2L-augustus-gene-10.8	0.1463	0.0961	0.6571	0.0757	0.0027	0.0352	0.1822	0.0033	0.0184	0.078	0.0025	0.0319	0.3005	0.0014	0.0046	BG
maker-1_C_2R-augustus-gene-25.106	0.062	0.0205	0.3303	0.07	0.0005	0.0074	0.0001	0	0.0111	0.0001	0	0.0127	0.0001	0	0.0111	BG
maker-1_C_2R-snap-gene-79.160	0.0841	1.6399	19.5051	0.1014	0.0005	0.0048	0.1336	0.0007	0.0055	0.0837	0.0005	0.0056	0.017	0.0002	0.0101	BG
maker-4_B_2L-augustus-gene-85.65	0.1675	3.1534	18.8303	0.0621	0.0015	0.0246	0.1215	0.0062	0.0513	0.0001	0	0.007	0.1311	0.0043	0.0326	BG
maker-1_C_2R-snap-gene-6.85	0.1257	0.0007	0.0059	4.55	0.0091	0.002	0.0001	0	0.0123	0.5028	0.004	0.008	2.7	0.0054	0.002	BG
maker-2_E_3R-augustus-gene-58.117	0.8187	0.6791	0.8295	0.1527	0.0009	0.0062	0.0703	0	0	0.0001	0	0.0118	0.6142	0.002	0.0033	BG
augustus_masked-4_B_2L-processed-gene-62.25	0.1396	0.07	0.5011	1.3533	0.0029	0.0021	0.1667	0.0029	0.0175	0.0001	0	0.0082	0.2893	0.0028	0.0098	BG
maker-2_E_3R-augustus-gene-100.86	0.0743	0	0	0.0559	0.002	0.0364	0.0299	0.0007	0.0225	0.0001	0	0.0197	0.0538	0.0007	0.0126	BG
maker-2_E_3R-augustus-gene-19.94	0.216	0.0391	0.1809	1.1201	0.0112	0.01	0.0001	0	0.0181	0.0439	0.0007	0.0156	0.4193	0.0105	0.0251	BG
maker-3_A_X-augustus-gene-58.97	0.169	0.0122	0.072	0.0996	0.0013	0.0134	0.0141	0.0006	0.0435	0.4468	0.0037	0.0083	NA	NA	NA	BG
augustus_masked-2_E_3R-processed-gene-74.29	0.0751	0.7644	10.1804	0.0001	0	0.0146	0.0001	0	0.0546	0.0001	0	0.0155	0.0001	0	0.0359	BG
maker-2_E_3R-augustus-gene-3.6	0.1459	0.0045	0.0311	0.0001	0	0.0019	0.0001	0	0	0.0001	0	0.0038	0.0001	0	0.0066	BG
maker-0_D_3L-snap-gene-26.125	0.2636	0.7634	2.8958	9.1083	0.0006	0.0001	0.0001	0	0.0425	0.0001	0	0.0068	0.1217	0.0084	0.0694	BG
maker-1_C_2R-augustus-gene-40.12	0.0693	1.6626	24.0069	0.2839	0.0019	0.0067	0.0001	0	0.0176	0.0001	0	0.0241	0.0001	0	0	BG
maker-0_D_3L-augustus-gene-37.153	0.1295	0.0723	0.5583	0.3552	0.0041	0.0115	0.0001	0	0	0.3452	0.0056	0.0161	0.0001	0	0	BG
maker-4_B_2L-augustus-gene-34.18	0.09	1.2123	13.4728	0.1094	0.0016	0.0149	0.1261	0.0015	0.0117	0.0001	0	0.0084	0.2625	0.0029	0.0111	BG
maker-1_C_2R-snap-gene-20.189	0.1399	0.034	0.2433	0.339	0.001	0.0029	0.0001	0	0.0121	0.1839	0.0011	0.0058	0.0927	0.0015	0.0161	BG
maker-2_E_3R-augustus-gene-47.12	0.1358	0.0444	0.3274	0.0001	0	0	0.0323	0.001	0.0324	0.8	0.0016	0.002	0.0001	0	0.0255	BG
maker-2_E_3R-augustus-gene-67.114	0.0905	0	0	0.0001	0	0.0033	0.0001	0	0.0136	0.0616	0.0011	0.0174	0.0428	0.0005	0.0126	BG
maker-2_E_3R-snap-gene-37.136	0.3438	0.2125	0.6182	0.3929	0.0028	0.007	0.0001	0	0.0113	1.7322	0.0145	0.0084	0.0001	0	0.041	BG
maker-3_A_X-snap-gene-10.58	0.0788	0.0032	0.04	0.2432	0	0	0.0001	0	0.0234	0.3729	0	0	0.0001	0	0.0114	BG
augustus_masked-2_E_3R-processed-gene-72.2	0.0335	1.9869	59.2905	0.0001	0	0.0064	0.0743	0.0011	0.0152	0.0001	0	0.0187	0.0001	0	0.0235	BG
maker-4_B_2L-augustus-gene-56.149	0.1266	0.0685	0.5414	0.1823	0.0011	0.0059	0.4939	0.0011	0.0021	0.55	0.0011	0.002	0.088	0.0011	0.0121	BG
maker-4_B_2L-snap-gene-34.230	0.0677	3.7764	55.785	0.0001	0	0.0165	0.0994	0.0024	0.0241	0.0001	0	0.007	0.0001	0	0.0184	BG
maker-0_D_3L-augustus-gene-4.50	0.0406	0.0262	0.6443	0.0415	0.0008	0.0185	0.15	0.0003	0.002	0.0226	0.0005	0.0218	0.0001	0	0	BG
maker-3_A_X-augustus-gene-70.89	0.1103	0.0362	0.3281	0.0001	0	0.0229	0.056	0.0008	0.0141	0.0218	0.0005	0.0236	0.0357	0.0008	0.0219	BG
snap_masked-3_A_X-processed-gene-37.4	0.0874	0.0112	0.1282	0.0001	0	0.0051	0.685	0.006	0.0087	0.0001	0	0.0051	0.0001	0	0.0091	BG
augustus_masked-2_E_3R-processed-gene-67.38	0.0261	0.0112	0.4306	0.425	0	0	0.0001	0	0.0377	0.1665	0	0	0.0001	0	0.0026	BG
maker-3_A_X-augustus-gene-36.59	0.0469	0.0078	0.166	0.0001	0	0.0032	37.9487	0.0017	0	0.0001	0	0.0187	0.1827	0.507	2.7746	BG
maker-2_E_3R-snap-gene-20.128	0.0154	0.9042	58.7376	0.0001	0	0.0179	0.0001	0	0.021	0.0001	0	0.0151	0.0001	0	0.0194	BG
maker-5_U_U-augustus-gene-20.53	0.0342	1.9617	57.4078	0.0001	0	0.0059	0.0001	0	0	0.124	0.001	0.0078	0.0001	0	0	BG
maker-4_B_2L-augustus-gene-33.104	0.0723	0.5886	8.1442	0.0001	0	0.0227	0.0001	0	0.0121	0.0548	0.0026	0.047	0.0538	0.0022	0.0403	BG
augustus_masked-2_E_3R-processed-gene-75.3	0.0776	1.9006	24.504	0.0001	0	0.0198	0.0702	0.002	0.028	0.0641	0.0016	0.0245	0.0487	0.0014	0.0295	BG
maker-3_A_X-augustus-gene-7.7	0.2667	0.1068	0.4006	0.3653	0.0045	0.0123	0.0521	0.0011	0.0212	0.1047	0.0016	0.0157	0.1018	0.0016	0.016	BG
maker-1_C_2R-augustus-gene-22.117	0.0746	0.0083	0.1117	0.0219	0.0004	0.0186	0.1038	0.0089	0.0853	0.0735	0.0017	0.0229	0.1038	0.0089	0.0853	BG
maker-2_E_3R-augustus-gene-24.108	0.1447	0.0661	0.4568	0.0772	0.0015	0.0194	0.0908	0.0028	0.0308	0.0897	0.0024	0.0264	0.0747	0.0011	0.0149	BG
maker-3_A_X-augustus-gene-15.5	0.0926	0.0619	0.6686	0.0545	0.0008	0.0144	0.0001	0	0	0.0001	0	0.0155	0.6562	0	0	BG
snap_masked-2_E_3R-processed-gene-71.40	0.217	0.1967	0.9065	0.2303	0.0046	0.0199	0.1283	0.0047	0.0364	0.1562	0.0017	0.0111	0.023	0.0009	0.0412	BG
maker-1_C_2R-snap-gene-38.147	0.2022	0.1007	0.4982	0.0001	0	0.0036	0.0391	0.0011	0.0269	0.1019	0.0011	0.0106	0.0001	0	0.0394	BG
maker-1_C_2R-augustus-gene-3.99	0.0895	0	0	0.0001	0	0.0343	0.5	0.001	0.002	0.0001	0	0.0204	0.0997	0.0029	0.029	BG
maker-2_E_3R-augustus-gene-31.56	0.0819	3.1756	38.7778	0.1257	0.0011	0.0084	0.0001	0	0.0133	0.0379	0.0011	0.0281	0.0001	0	0.0173	BG
maker-1_C_2R-augustus-gene-28.80	0.051	0.0213	0.4182	0.0001	0	0.0028	0.1289	0.0026	0.0203	0.1736	0.0021	0.0119	0.0447	0.0014	0.0304	BG
maker-2_E_3R-snap-gene-5.142	0.2905	0.8185	2.8172	0.0001	0	0	0.2785	0.0009	0.0031	0.1719	0.0028	0.0162	0.0945	0.0018	0.0192	BG
maker-0_D_3L-snap-gene-82.68	0.2186	0.2764	1.2641	0.0574	0.0016	0.0278	0.1493	0.004	0.0265	0.1406	0.0027	0.0191	0.1196	0.0054	0.0452	BG
maker-0_D_3L-snap-gene-35.16	0.1694	1.266	7.4731	0.2948	0.0029	0.0099	0.8224	0.0065	0.0079	0.1468	0.0061	0.0417	0.2214	0.0064	0.0289	BG
maker-3_A_X-augustus-gene-101.78	0.0711	0.8183	11.5125	0.0001	0	0.0592	0.0001	0	0	0.0001	0	0.0317	0.0001	0	0	BG
augustus_masked-0_D_3L-processed-gene-55.8	0.4098	0.4199	1.0247	0.6224	0.0065	0.0105	0.0001	0	0.0123	0.2514	0.0039	0.0156	0.4042	0.0059	0.0146	BG
maker-0_D_3L-augustus-gene-40.124	0.1476	0.0861	0.5837	0.5718	0.001	0.0018	0.1044	0.0004	0.0034	0.1334	0.0021	0.0159	0.3417	0.0018	0.0051	BG
maker-1_C_2R-augustus-gene-24.12	0.185	1.3421	7.2559	0.0001	0	0.0085	0.0001	0	0.009	0.5902	0.006	0.0102	0.1461	0.003	0.0202	BG
maker-2_E_3R-augustus-gene-31.55	0.2616	0.2549	0.9746	0.0919	0.0017	0.0187	0.1103	0.0011	0.01	0.1328	0.0021	0.0161	0.1648	0.0026	0.0157	BG
snap_masked-0_D_3L-processed-gene-13.105	0.3331	0.009	0.0269	0.572	0	0	0.2561	0.0071	0.0276	0.8446	0	0	3.3	0.0066	0.002	BG
maker-2_E_3R-snap-gene-37.153	0.1125	0.0172	0.1531	2.45	0.0049	0.002	0.1235	0.0024	0.0192	0.0679	0.001	0.0148	0.0001	0	0.0097	BG
maker-0_D_3L-snap-gene-56.114	0.1786	0.019	0.1064	0.0001	0	0.0067	0.0001	0	0.0066	0.0001	0	0.0194	1.3	0.0026	0.002	BG
augustus_masked-1_C_2R-processed-gene-39.14	0.1235	0.0851	0.6892	0.0001	0	0.0089	0.0784	0.0006	0.0075	0.3138	0.0016	0.005	0.0001	0	0.0033	BG
maker-3_A_X-augustus-gene-59.106	0.0424	0.0262	0.6178	0.0001	0	0.0246	0.0001	0	0.053	0.0508	0.0007	0.0136	0.0648	0.0019	0.0295	BG
maker-3_A_X-augustus-gene-69.68	0.3282	0.2856	0.8703	0.083	0.001	0.0124	0.0001	0	0	0.0641	0.001	0.016	0.0001	0	0	BG
maker-1_C_2R-snap-gene-9.20	0.7957	0.0427	0.0536	0.4096	0.0056	0.0137	0.1724	0.0146	0.0845	0.0001	0	0.0048	0.1724	0.0146	0.0845	BG
maker-3_A_X-snap-gene-43.124	0.0543	0.016	0.2949	0.3031	0.0014	0.0045	0.5904	0.0029	0.0049	0.3422	0.0084	0.0245	0.0001	0	0.0076	BG
maker-2_E_3R-augustus-gene-101.76	0.0555	0.0398	0.7164	0.1169	0.0011	0.0098	0.3	0.0006	0.002	0.0861	0.0007	0.0079	0.0001	0	0.0017	BG
maker-3_A_X-augustus-gene-10.38	0.1156	0.05	0.4322	0.0239	0.0006	0.0241	0.0001	0	0	0.0265	0.0006	0.0223	0.0001	0	0	BG
maker-1_C_2R-snap-gene-38.150	0.5089	0	0	0.2864	0.0029	0.0101	0.2864	0.0029	0.0101	0.6668	0.0371	0.0557	0.8148	0.0046	0.0056	BG
maker-4_B_2L-augustus-gene-83.103	0.0405	0.0091	0.2254	0.0001	0	0.0042	0.0001	0	0.0096	0.076	0	0	0.0001	0	0.0065	BG
augustus_masked-0_D_3L-processed-gene-71.0	0.0584	0.0505	0.8649	0.0001	0	0.0347	0.0145	0.0005	0.034	0.0001	0	0.0271	0.0139	0.0006	0.0424	BG
augustus_masked-2_E_3R-processed-gene-5.30	0.0513	2.9358	57.2558	0.0001	0	0.0186	0.4304	0.0014	0.0032	0.0001	0	0.0182	0.0478	0.0009	0.0193	BG
maker-2_E_3R-augustus-gene-63.140	0.0677	0.0332	0.4907	0.1135	0.0014	0.0127	0.0874	0.0031	0.0354	0.018	0.0007	0.0379	0.0542	0.0028	0.0525	BG
maker-3_A_X-augustus-gene-18.58	0.0123	0.0095	0.771	0.304	0	0	0.0001	0	0	0.0001	0	0.0165	0.1903	0	0	BG
maker-4_B_2L-augustus-gene-18.146	0.0304	0.0055	0.1796	0.0001	0	0.009	0.0001	0	0.0031	0.4611	0	0	0.0001	0	0.0096	BG
maker-1_C_2R-augustus-gene-77.100	0.0164	0.0061	0.3737	0.0835	0.0019	0.0227	0.0001	0	0.0553	0.0001	0	0.0072	0.0001	0	0.038	BG
maker-3_A_X-snap-gene-74.95	0.3702	0.1076	0.2907	0.3997	0.0028	0.007	61.6863	0.0039	0.0001	0.0001	0	0	6.85	0.0137	0.002	BG
maker-3_A_X-augustus-gene-7.66	0.0689	0.029	0.4202	0.0001	0	0.0259	0.0464	0.0005	0.0113	0.0466	0.0016	0.0341	0.0178	0.0005	0.0295	BG
maker-0_D_3L-snap-gene-26.137	0.0421	1.2384	29.4086	0.0001	0	0.0049	0.0379	0.0018	0.0488	0.1709	0.0009	0.005	0.0426	0.0017	0.0399	BG
maker-2_E_3R-augustus-gene-74.130	0.1284	5.7861	45.0605	0.0001	0	0.0296	0.1614	0.0048	0.0298	0.0489	0.0015	0.0307	0.0319	0.0005	0.0141	BG
augustus_masked-1_C_2R-processed-gene-44.12	0.1325	0.0682	0.515	0.0228	0.0005	0.0219	0.0731	0.002	0.0276	0.1227	0.002	0.0164	0.0389	0.0015	0.0388	BG
snap_masked-3_A_X-processed-gene-49.13	0.3032	0.0772	0.2548	0.2141	0.0045	0.0209	10.45	0.0209	0.002	0.1211	0.0045	0.0372	1.237	0.013	0.0105	BG
maker-2_E_3R-augustus-gene-38.146	0.0807	0.0277	0.3438	0.0001	0	0	0.0001	0	0.0565	0.0001	0	0.0419	1.7982	0.0059	0.0033	BG
maker-4_B_2L-augustus-gene-41.69	0.0805	2.123	26.3647	0.0001	0	0.0082	0.0001	0	0.0171	0.0001	0	0	0.0874	0.0011	0.012	BG
maker-2_E_3R-augustus-gene-12.55	0.065	3.0792	47.3768	0.3381	0.0019	0.0056	0.0103	0.0005	0.0449	0.1054	0.0009	0.0087	0.0001	0	0.0274	BG
maker-1_C_2R-augustus-gene-77.126	0.0599	0.019	0.3178	0.0698	0.0009	0.0122	0.0001	0	0	0.0168	0.0003	0.0168	0.0001	0	0	BG
maker-2_E_3R-augustus-gene-62.113	0.0779	1.2159	15.5998	0.0001	0	0.0213	0.0001	0	0.0195	0.0001	0	0	0.0001	0	0.0062	BG
snap_masked-2_E_3R-processed-gene-26.46	0.0821	0.0221	0.2689	0.056	0	0	0.0001	0	0	0.3821	0	0	0.2813	0	0	BG
maker-0_D_3L-augustus-gene-5.73	1.0977	0.5714	0.5205	0.0001	0	0.0174	0.8379	0.0059	0.007	0.0001	0	0.0154	2.75	0.0055	0.002	BG
snap_masked-1_C_2R-processed-gene-43.50	0.6456	0.1186	0.1838	0.755	0.0077	0.0102	0.781	0.0051	0.0066	0.7198	0.0116	0.0161	0.2783	0.0029	0.0104	BG
maker-3_A_X-augustus-gene-40.9	0.0807	0.0413	0.5121	0.0411	0.0011	0.0275	0.0001	0	0.0321	0.0697	0.0013	0.0188	0.0583	0.0037	0.0637	BG
maker-4_B_2L-augustus-gene-15.73	0.1398	0.0164	0.1172	0.0001	0	0	0.0512	0.0055	0.108	0.0001	0	0.016	NA	NA	NA	BG
maker-1_C_2R-augustus-gene-10.67	0.1059	0.0538	0.5078	0.0879	0.0019	0.0213	0.077	0.0026	0.0332	0.0932	0.0028	0.0297	0.0842	0.0028	0.033	BG
maker-0_D_3L-augustus-gene-15.158	0.1172	0.0237	0.2025	0.0001	0	0	0.0001	0	0	0.1296	0.0026	0.0198	0.0001	0	0.0069	BG
maker-2_E_3R-augustus-gene-65.98	0.0781	0.0011	0.0142	0.0001	0	0.002	0.187	0.003	0.016	0.0001	0	0.0062	0.0001	0	0.0122	BG
maker-1_C_2R-snap-gene-5.150	0.0111	0.7592	68.4207	0.0001	0	0.0194	0.0001	0	0	0.0001	0	0.0219	0.0001	0	0	BG
augustus_masked-0_D_3L-processed-gene-61.27	0.2631	0.1345	0.5112	1.636	0.0022	0.0013	0.4057	0.0199	0.0492	0.0466	0.0007	0.0154	0.0001	0	0.0517	BG
augustus_masked-4_B_2L-processed-gene-73.3	0.1703	0.0643	0.3778	0.0001	0	0	0.0001	0	0	0.0001	0	0.059	0.2037	0	0	BG
maker-1_C_2R-augustus-gene-8.129	0.0269	0.0241	0.8936	0.0841	0.0019	0.0225	0.0743	0.0009	0.0126	0.0001	0	0.0061	0.0001	0	0.0449	BG
maker-2_E_3R-augustus-gene-32.84	0.0899	0.034	0.378	0.0001	0	0.0055	0.0001	0	0.0133	0.2098	0.0021	0.0098	0.0001	0	0.0103	BG
maker-1_C_2R-augustus-gene-51.117	0.1156	0.0822	0.7112	1.1	0.0022	0.002	0.0001	0	0	0.1263	0.0048	0.0384	0.0001	0	0	BG
maker-4_B_2L-augustus-gene-41.74	0.1684	1.8655	11.0765	0.0001	0	0.0097	0.0456	0.0011	0.0239	0.3505	0.0022	0.0063	0.0001	0	0.031	BG
snap_masked-0_D_3L-processed-gene-31.87	0.1591	0.111	0.6977	0.0001	0	0.0069	0.2165	0.0022	0.0102	0.0001	0	0.0073	0.0001	0	0.0217	BG
maker-2_E_3R-snap-gene-10.12	0.0293	0.01	0.3418	0.0001	0	0.0111	0.0445	0.0015	0.0345	0.0518	0.0008	0.0149	0.0206	0.0008	0.0372	BG
maker-3_A_X-augustus-gene-69.74	0.0512	2.7451	53.6494	0.1264	0.0018	0.0142	0.0001	0	0.0227	0.0001	0	0.0288	0.0001	0	0.0209	BG
maker-2_E_3R-snap-gene-93.84	0.1755	0	0	0.0289	0.0021	0.071	0.0289	0.0021	0.071	0.0934	0.0226	0.2424	0.0001	0	0.0488	BG
snap_masked-1_C_2R-processed-gene-79.50	0.0302	1.3784	45.6339	0.0354	0.0006	0.0162	0.0001	0	0.029	0.0349	0.0006	0.0165	0.0382	0.0014	0.0369	BG
maker-1_C_2R-augustus-gene-8.150	0.1643	0.0451	0.2743	0.0001	0	0.0042	0.2744	0.004	0.0146	0.3094	0.0013	0.0043	0.0001	0	0.0375	BG
maker-1_C_2R-augustus-gene-61.112	0.1663	0.05	0.3007	1	0.002	0.002	0.0506	0.0014	0.0275	0.0001	0	0.0246	0.1727	0.0025	0.0147	BG
maker-3_A_X-snap-gene-36.64	0.0276	0.0085	0.3093	0.0001	0	0.0091	0.0001	0	0	0.0001	0	0.0115	0.0001	0	0	BG
maker-0_D_3L-augustus-gene-59.115	0.1874	3.6012	19.2155	0.0001	0	0.0095	0.0001	0	0.004	0.1585	0	0	0.0001	0	0.0201	BG
maker-1_C_2R-augustus-gene-12.132	0.0157	0.0002	0.0119	0.0783	0.0009	0.0119	0.0001	0	0.003	0.0602	0.001	0.0166	0.0001	0	0.0074	BG
maker-0_D_3L-augustus-gene-15.184	0.0384	1.1966	31.1728	0.0001	0	0.0257	0.0001	0	0.012	0.0001	0	0.0252	0.0001	0	0.0189	BG
maker-1_C_2R-augustus-gene-47.103	0.043	2.4541	57.0545	0.0261	0.0009	0.0359	0.0001	0	0.0345	0.0001	0	0.0399	0.0927	0.0036	0.0384	BG
maker-3_A_X-snap-gene-29.30	0.0677	0.0208	0.3064	0.019	0.0003	0.0178	0.0511	0.0014	0.0277	0.0208	0.0003	0.016	0.0416	0.001	0.0248	BG
augustus_masked-0_D_3L-processed-gene-40.	0.0838	0.0455	0.543	3.8792	0.0067	0.0017	0.0001	0	0.0124	0.0919	0.0008	0.009	0.0001	0	0.0157	BG
maker-1_C_2R-augustus-gene-7.88	0.1507	0.0994	0.6594	0.1392	0.0018	0.0133	0.0731	0.001	0.0131	0.0626	0.0009	0.0149	0.2285	0.0027	0.0119	BG
maker-1_C_2R-snap-gene-12.159	0.1419	2.6877	18.9471	0.2056	0.0021	0.0103	0.0622	0.0023	0.0365	0.2025	0.0016	0.0077	0.0001	0	0.0174	BG
maker-2_E_3R-augustus-gene-14.10	0.0628	0.0251	0.3991	0.0001	0	0	0.0539	0.0014	0.0264	0.0001	0	0.0112	0.0001	0	0.02	BG
snap_masked-1_C_2R-processed-gene-33.103	0.5379	0	0	0.2556	0	0	0.2705	0.0215	0.0794	0.4249	0	0	0.2705	0.0215	0.0794	BG
snap_masked-2_E_3R-processed-gene-95.22	0.0816	0.0206	0.2523	19.65	0.0393	0.002	0.0001	0	0.0259	0.0001	0	0.0133	0.0001	0	0.0317	BG
maker-3_A_X-augustus-gene-14.73	0.041	0.0014	0.0331	0.013	0.0001	0.0104	0.0304	0.0021	0.0701	0.0001	0	0.0127	NA	NA	NA	BG
maker-3_A_X-augustus-gene-43.97	0.0715	3.437	48.0559	0.0001	0	0.0033	0.0001	0	0	0.3438	0.0015	0.0043	0.0001	0	0.0108	BG
maker-2_E_3R-augustus-gene-46.102	0.0584	1.7321	29.6515	0.0001	0	0.0089	0.0882	0.0024	0.0272	0.0862	0.0008	0.0091	0.1408	0.0016	0.0112	BG
maker-3_A_X-augustus-gene-44.12	0.0471	2.0481	43.4566	0.0001	0	0.0156	0.0251	0.0005	0.0217	0.0389	0.0006	0.0152	0.0001	0	0.0139	BG
augustus_masked-2_E_3R-processed-gene-57.6	0.2591	2.3376	9.0209	0.0001	0	0.0047	0.0001	0	0.0119	0.0001	0	0.0136	0.0001	0	0.0123	BG
maker-0_D_3L-snap-gene-15.218	0.8633	1.1222	1.2999	0.6695	0.006	0.0089	3.6253	0	0	0.6692	0.0091	0.0136	0.0001	0	0.0049	BG
maker-1_C_2R-augustus-gene-12.136	0.7842	0.0781	0.0996	0.1953	0	0	2.4359	0.0277	0.0114	0.9543	0.0077	0.0081	2.4359	0.0277	0.0114	BG
maker-2_E_3R-snap-gene-62.132	0.1178	0.0702	0.5956	0.0877	0.0011	0.013	0.0788	0.0024	0.0301	0.0398	0.0011	0.0271	0.0001	0	0.0146	BG
maker-1_C_2R-augustus-gene-13.10	0.0443	0.0213	0.4808	0.0001	0	0.0023	0.2931	0.0006	0.0021	0.0001	0	0.0042	0.0001	0	0	BG
maker-2_E_3R-augustus-gene-22.147	0.0961	1.6228	16.8885	0.1535	0.0021	0.0137	0.0771	0.0018	0.0236	0.1163	0.001	0.0089	0.0758	0.0044	0.0575	BG
maker-3_A_X-augustus-gene-25.92	0.1927	0.0204	0.106	0.1703	0.0021	0.0121	0.1703	0.0021	0.0121	0.0363	0.0043	0.118	0.1141	0.002	0.0174	BG
maker-2_E_3R-augustus-gene-74.109	0.3943	0.0071	0.018	0.4824	0.0026	0.0053	0.1248	0.0073	0.0584	1.1251	0.0016	0.0014	0.1248	0.0073	0.0584	BG
maker-0_D_3L-augustus-gene-71.98	0.0407	0.0126	0.3085	0.0001	0	0	0.0001	0	0.0064	0.0001	0	0.0049	0.0001	0	0.0252	BG
maker-2_E_3R-augustus-gene-22.136	0.2418	0.2019	0.8347	0.0001	0	0.0064	0.0001	0	0.0033	0.5779	0.0021	0.0037	0.0001	0	0	BG
maker-4_B_2L-augustus-gene-40.103	0.0246	0.0003	0.0118	0.4405	0	0	0.0001	0	0.0118	0.0001	0	0.0124	0.0001	0	0.0398	BG
maker-1_C_2R-augustus-gene-40.154	1.5979	2.2586	1.4134	0.5525	0.0829	0.15	0.3334	0	0	0.6587	0.0035	0.0053	0.3556	0	0	BG
maker-4_B_2L-augustus-gene-95.85	0.1484	0.0089	0.0603	0.0001	0	0.018	0.244	0.0084	0.0346	0.2527	0.0052	0.0204	0.244	0.0084	0.0346	BG
maker-0_D_3L-augustus-gene-7.40	0.152	0.0226	0.1488	0.0001	0	0.0065	0.0001	0	0.0115	0.0001	0	0	0.0001	0	0.0091	BG
maker-2_E_3R-augustus-gene-67.153	0.1346	0.0977	0.7262	0.2058	0.0037	0.018	0.2986	0.0048	0.0162	0.0747	0.0013	0.0172	0.1359	0.002	0.0147	BG
maker-1_C_2R-augustus-gene-48.75	0.0575	0.0055	0.0948	7.5997	0	0	0.0001	0	0.0099	0.0223	0.0002	0.0107	0.0373	0.0008	0.0224	BG
maker-0_D_3L-augustus-gene-33.115	0.0579	0.0141	0.2442	0.0001	0	0.004	0.3698	0.0031	0.0084	0.0001	0	0.0171	0.1866	0.0016	0.0083	BG
maker-3_A_X-snap-gene-33.188	0.0796	0.0179	0.2247	0.0001	0	0	0.0001	0	0	0.0001	0	0.0047	0.1217	0.0009	0.0075	BG
maker-2_E_3R-augustus-gene-52.124	0.1428	0.108	0.7566	0.4027	0.0054	0.0135	0.0001	0	0.0325	0.0277	0.0008	0.028	0.0394	0.001	0.0258	BG
maker-2_E_3R-augustus-gene-57.138	0.1034	0.0001	0.0013	0.0401	0.0009	0.0233	0.7824	0.0017	0.0022	0.0508	0.0014	0.027	0.3404	0.0017	0.005	BG
maker-3_A_X-augustus-gene-50.63	0.2502	0.0248	0.099	0.0001	0	0.0545	0.0001	0	0.0545	0.4066	0.025	0.0615	0.051	0.0044	0.087	BG
maker-2_E_3R-snap-gene-46.168	0.1309	0.0806	0.6154	0.044	0.001	0.0219	0.4814	0.0034	0.007	0.1322	0.0024	0.0179	0.1867	0.0017	0.0091	BG
maker-2_E_3R-augustus-gene-31.53	0.0724	0.9286	12.8179	0.0001	0	0.0071	0.0364	0.0014	0.0374	0.1872	0.0039	0.021	0.0001	0	0.0629	BG
maker-0_D_3L-augustus-gene-33.112	0.0678	2.2978	33.8875	0.0331	0.0005	0.0148	0.0786	0.001	0.0131	0.0471	0.0005	0.0104	0.1014	0.001	0.0101	BG
maker-1_C_2R-snap-gene-47.139	0.2382	0.0809	0.3394	0.5946	0.0005	0.0009	0.0329	0.001	0.0314	0.2236	0.0036	0.0161	0.1244	0.0044	0.0354	BG
maker-0_D_3L-augustus-gene-35.14	0.2857	0.1946	0.681	0.1656	0.0016	0.0095	0.3094	0.0067	0.0216	0.0677	0.0009	0.0136	0.2875	0.0059	0.0207	BG
maker-4_B_2L-snap-gene-21.176	0.0395	0.0036	0.0906	0.3626	0	0	0.0705	0.0086	0.1215	0.4428	0	0	NA	NA	NA	BG
maker-2_E_3R-augustus-gene-84.123	0.1261	2.4847	19.7087	0.2171	0.0009	0.004	0.1519	0.0023	0.0148	0.0522	0.0004	0.0084	0.0939	0.0018	0.0192	BG
maker-2_E_3R-augustus-gene-7.80	0.0831	0.0199	0.24	0.0001	0	0.0271	0.0001	0	0.0266	0.0001	0	0.0148	0.0898	0.0015	0.0167	BG
maker-3_A_X-augustus-gene-19.76	0.1027	0.0637	0.6201	0.0654	0.0014	0.0209	0.0001	0	0	0.0299	0.0005	0.0159	0.0001	0	0	BG
maker-1_C_2R-augustus-gene-12.	0.1403	1.8233	12.9909	0.2721	0.0035	0.0129	0.0856	0.0017	0.0201	0.0656	0.0018	0.0276	0.0001	0	0.054	BG
maker-0_D_3L-snap-gene-75.125	0.1515	0.1038	0.6855	0.0001	0	0.004	0.0001	0	0.0145	0.0803	0.0017	0.0209	0.1163	0.0032	0.0273	BG
maker-3_A_X-augustus-gene-44.119	0.0538	0.0308	0.5718	0.0366	0.0005	0.0135	0.0579	0.0005	0.0088	0.0544	0.0005	0.0101	0.0295	0.0005	0.0174	BG
maker-1_C_2R-augustus-gene-8.145	0.6416	0.0269	0.0419	0.0001	0	0.0229	0.0001	0	0.0721	2	0.004	0.002	NA	NA	NA	BG
maker-4_B_2L-augustus-gene-50.83	0.2305	3.245	14.0788	0.0001	0	0.0122	3.35	0.0067	0.002	0.0476	0.002	0.0417	4.7	0.0094	0.002	BG
snap_masked-3_A_X-processed-gene-43.60	0.0757	0.0364	0.481	0.0001	0	0.021	0.3824	0.0025	0.0066	0.0001	0	0.0271	0.0749	0.0012	0.0159	BG
maker-0_D_3L-augustus-gene-81.89	0.2394	0.1991	0.8315	0.0001	0	0.0069	0.039	0.0012	0.0308	0.3295	0.0023	0.007	0.0252	0.0007	0.0268	BG
maker-0_D_3L-augustus-gene-25.76	0.0618	0.7112	11.5017	0.394	0	0	0.0001	0	0.064	2.3	0.0046	0.002	0.0001	0	0.0214	BG
maker-2_E_3R-augustus-gene-45.90	0.2008	0.1173	0.5842	0.2143	0.0017	0.0078	0.0001	0	0	0.2938	0.0101	0.0344	0.85	0.0017	0.002	BG
augustus_masked-0_D_3L-processed-gene-33.10	0.101	0.0295	0.2917	0.0001	0	0.0253	0.8567	0.0092	0.0107	4.5367	0.0044	0.001	0.0001	0	0.0128	BG
maker-2_E_3R-augustus-gene-100.83	0.1026	0.0251	0.2442	0.0001	0	0.0126	0.1082	0.0042	0.039	0.387	0	0	0.3351	0.0042	0.0126	BG
augustus_masked-4_B_2L-processed-gene-53.16	0.0522	0.0145	0.2783	0.0001	0	0.0186	0.0001	0	0.0069	0.0001	0	0.0036	0.0001	0	0.0232	BG
maker-2_E_3R-augustus-gene-84.127	0.0203	0.0079	0.3889	0.0001	0	0.0116	0.0001	0	0.0277	0.0001	0	0.014	0.0001	0	0.0191	BG
maker-2_E_3R-snap-gene-73.9	0.2461	1.5711	6.3849	0.2874	0.0038	0.0133	0.1371	0.0077	0.0563	0.3083	0	0	0.186	0.0077	0.0412	BG
maker-2_E_3R-augustus-gene-48.100	0.0429	2.3211	54.088	0.0001	0	0.0154	0.0107	0.0004	0.0365	0.0217	0.0004	0.0183	0.0122	0.0004	0.0324	BG
maker-1_C_2R-augustus-gene-20.172	0.1543	2.9205	18.9337	0.0001	0	0.0105	0.8	0.0016	0.002	0.0001	0	0.0054	0.0956	0.0006	0.0062	BG
maker-2_E_3R-augustus-gene-48.99	7.5247	0	0	0.1753	0	0	0.303	0.0401	0.1323	0.2619	0	0	0.303	0.0401	0.1323	BG
augustus_masked-2_E_3R-processed-gene-107.12	0.2623	0.2077	0.7918	0.1728	0.0025	0.0144	0.0001	0	0	0.2225	0.003	0.0133	0.0001	0	0	BG
snap_masked-4_B_2L-processed-gene-95.42	0.0712	0.0031	0.0441	0.0001	0	0.0075	0.0001	0	0.0075	0.0862	0.0047	0.054	0.235	0.0009	0.0039	BG
augustus_masked-2_E_3R-processed-gene-57.2	0.1612	1.7952	11.1378	0.2174	0.0032	0.0148	0.1884	0.0035	0.0187	0.2866	0.0017	0.006	0.0897	0.003	0.0333	BG
maker-2_E_3R-augustus-gene-48.92	0.0546	0.0192	0.3519	0.0001	0	0.0158	0.0001	0	0.0291	0.0001	0	0.0272	0.0471	0.0009	0.0197	BG
maker-2_E_3R-snap-gene-94.138	0.1008	0.048	0.4763	2	0.004	0.002	0.0001	0	0.013	0.0001	0	0.0125	0.0001	0	0.0133	BG
augustus_masked-0_D_3L-processed-gene-71.	0.022	0.0013	0.0573	0.0001	0	0.027	0.0212	0.0016	0.0769	0.0001	0	0.029	0.0212	0.0016	0.0769	BG
maker-0_D_3L-augustus-gene-83.68	0.0398	0.1596	4.0143	0.0001	0	0.016	0.0001	0	0.0116	0.2182	0.0021	0.0094	0.0001	0	0.0087	BG
maker-1_C_2R-augustus-gene-8.120	0.8926	0	0	2.1993	0.0099	0.0045	0.299	0.0741	0.2478	1.2606	0.0136	0.0108	NA	NA	NA	BG
maker-4_B_2L-augustus-gene-48.109	0.3498	0.1403	0.4012	0.3501	0.0008	0.0022	1.4991	0.0021	0.0014	0.3251	0.003	0.0093	0.0001	0	0.0018	BG
maker-4_B_2L-snap-gene-44.79	0.1067	5.0403	47.2185	0.2729	0.0009	0.0031	0.0001	0	0.0041	0.5192	0.0068	0.0132	0.0001	0	0.0171	BG
maker-2_E_3R-augustus-gene-35.122	0.0016	0.0004	0.216	0.0001	0	0.0246	0.0001	0	0.0162	0.0001	0	0.0088	0.0001	0	0.0361	BG
maker-4_B_2L-snap-gene-49.157	0.1343	0.074	0.5515	0.2363	0.0011	0.0047	0.0001	0	0	0.0001	0	0.0046	0.0001	0	0	BG
maker-4_B_2L-snap-gene-62.122	0.0306	0.0099	0.3232	0.3857	0	0	0.0001	0	0.0154	0.2871	0.0009	0.0033	0.0421	0.001	0.0247	BG
snap_masked-1_C_2R-processed-gene-29.69	0.0758	0.0419	0.5533	0.0001	0	0.0035	0.0549	0.0013	0.0234	0.2849	0.0012	0.0042	0.0814	0.0019	0.0236	BG
augustus_masked-2_E_3R-processed-gene-84.	0.0335	0.0166	0.4961	0.0001	0	0.0091	0.1194	0.0025	0.0212	0.0001	0	0.0091	0.0001	0	0.0638	BG
maker-2_E_3R-augustus-gene-14.86	0.0586	0.0607	1.0363	0.0001	0	0.0171	0.25	0.0005	0.002	0.0001	0	0.0187	0.0001	0	0	BG
maker-0_D_3L-augustus-gene-79.12	0.0931	0.0644	0.6923	0.0698	0	0	0.0001	0	0.0286	0.0001	0	0.0123	0.0001	0	0.024	BG
augustus_masked-2_E_3R-processed-gene-4.5	0.2222	0.1524	0.686	0.0001	0	0.0225	0.2793	0.0016	0.0057	0.0001	0	0.0458	0.4863	0.0032	0.0066	BG
maker-1_C_2R-augustus-gene-22.116	0.1731	0.0884	0.511	0.24	0.0037	0.0154	0.2769	0.0048	0.0174	0.2109	0.0038	0.0178	0.163	0.0067	0.0413	BG
maker-1_C_2R-snap-gene-20.216	0.5463	0.3864	0.7072	0.077	0.003	0.0386	0.3389	0.0024	0.007	0.0001	0	0.0299	2.4495	0.0022	0.0009	BG
maker-1_C_2R-augustus-gene-24.110	0.1817	0.112	0.616	0.2117	0.0067	0.0315	0.3305	0.0037	0.0113	0.088	0.0038	0.0437	0.0001	0	0.0218	BG
maker-0_D_3L-augustus-gene-68.78	0.0272	1.5346	56.4723	0.0001	0	0.0114	0.0001	0	0.0251	0.0001	0	0.0179	0.0001	0	0.0317	BG
augustus_masked-2_E_3R-processed-gene-21.19	0.0465	2.5606	55.0187	0.0001	0	0.0221	0.0001	0	0	0.0315	0.0017	0.0537	0.0001	0	0.0116	BG
maker-2_E_3R-augustus-gene-82.103	0.098	0.0272	0.2776	0.324	0.001	0.0031	0.0603	0.0017	0.0281	0.0264	0.0009	0.0357	0.0764	0.0022	0.0282	BG
maker-3_A_X-augustus-gene-62.78	0.1008	0.0264	0.2621	0.0001	0	0.0123	0.1851	0.0134	0.0724	0.1886	0.002	0.0104	0.0759	0.0022	0.0289	BG
maker-4_B_2L-augustus-gene-58.96	0.3003	0.2633	0.8769	0.9495	0.0025	0.0026	0.0001	0	0	0.2905	0.0016	0.0056	0.0001	0	0	BG
maker-3_A_X-augustus-gene-79.109	0.205	1.4264	6.9591	0.0623	0.0011	0.0171	0.2625	0.0018	0.0068	0.0001	0	0.007	0.75	0.0015	0.002	BG
maker-2_E_3R-augustus-gene-61.127	0.1224	1.744	14.2492	0.0509	0.0012	0.0242	0.1469	0.0012	0.0083	0.2476	0.002	0.0082	0.1403	0.0012	0.0087	BG
augustus_masked-1_C_2R-processed-gene-25.30	0.0988	1.1977	12.125	0.0001	0	0.0436	0.0001	0	0.0307	0.0001	0	0.0313	0.4841	0.0111	0.023	BG
augustus_masked-3_A_X-processed-gene-78.20	0.3111	0.4675	1.5026	0.3702	0	0	0.0518	0.001	0.0194	0.1061	0	0	0.0001	0	0.0103	BG
maker-0_D_3L-augustus-gene-61.107	0.1725	0.002	0.0114	0.0001	0	0.0391	0.0001	0	0.0391	0.0001	0	0	0.0001	0	0.0194	BG
snap_masked-0_D_3L-processed-gene-10.55	0.0342	0.0032	0.093	0.0001	0	0.0056	0.0172	0.0018	0.1058	0.0001	0	0.0243	0.0172	0.0018	0.1058	BG
maker-2_E_3R-snap-gene-60.150	0.1802	0.069	0.3831	0.0001	0	0.0039	0.0884	0.0013	0.0151	0.1294	0.0013	0.0103	0.0001	0	0.0037	BG
maker-0_D_3L-snap-gene-62.145	0.049	0.0232	0.4725	0.1351	0.0012	0.0086	0.0001	0	0.057	0.1151	0.0023	0.0202	0.0001	0	0.0514	BG
snap_masked-1_C_2R-processed-gene-4.46	0.1328	0.1306	0.9834	0.0001	0	0.0221	0.0001	0	0	0.0747	0.0014	0.0183	0.0001	0	0	BG
maker-0_D_3L-augustus-gene-12.85	0	0	0.0099	NA	NA	NA	NA	NA	NA	NA	NA	NA	NA	NA	NA	BG
maker-2_E_3R-snap-gene-51.173	0.1775	0.077	0.4336	0.2781	0.0046	0.0165	0.2605	0.0041	0.0158	0.455	0.0017	0.0038	0.0001	0	0.0159	BG
maker-1_C_2R-augustus-gene-27.86	0.2727	2.5783	9.4533	1.15	0.0023	0.002	0.4282	0.0066	0.0154	1.15	0.0023	0.002	3.1	0.0062	0.002	BG
maker-6_F_4-augustus-gene-1.66	0.2454	1.418	5.7794	0.3701	0.0005	0.0014	0.2913	0.0011	0.0038	0.2051	0.001	0.005	0.0001	0	0.0018	BG
maker-4_B_2L-augustus-gene-67.102	0.0256	1.5588	60.821	0.0001	0	0.0108	0.0516	0.0026	0.0509	0.0393	0.0013	0.0335	0.0381	0.0026	0.0688	BG
augustus_masked-0_D_3L-processed-gene-36.30	0.3671	0.1771	0.4824	0.1435	0.0036	0.0248	0.0001	0	0	0.7669	0.0037	0.0048	0.0001	0	0	BG
maker-1_C_2R-snap-gene-60.183	0.0452	0.0003	0.0063	0.1163	0.0013	0.011	0.0355	0.0084	0.2359	0.0619	0.0013	0.0205	0.0355	0.0084	0.2359	BG
maker-0_D_3L-augustus-gene-32.7	0.09	0.0498	0.5534	0.3102	0.0011	0.0036	0.1247	0.0019	0.0155	0.1488	0.0013	0.0084	0.0597	0.0007	0.0111	BG
maker-0_D_3L-augustus-gene-37.145	0.1297	0.0012	0.0094	0.3222	0	0	0.0001	0	0	0.0001	0	0.0425	0.0001	0	0	BG
maker-1_C_2R-augustus-gene-39.167	0.2783	0.8983	3.2281	0.1348	0.0019	0.0138	0.0463	0.0008	0.0178	0.1677	0.0026	0.0158	0.3618	0.0056	0.0156	BG
maker-1_C_2R-augustus-gene-74.100	0.3571	1.4647	4.1019	0.1614	0.0013	0.0079	0.0001	0	0.0261	0.1147	0.0015	0.0126	0.5903	0.0296	0.0501	BG
maker-0_D_3L-augustus-gene-62.10	0.0271	0	0	0.0001	0	0.0166	0.0286	0.0033	0.1171	0.0001	0	0.0147	0.0286	0.0033	0.1171	BG
maker-2_E_3R-augustus-gene-20.10	0.0673	0.0059	0.0876	0.55	0.0011	0.002	0.0964	0.0011	0.0112	0.0001	0	0.0053	0.0001	0	0.0054	BG
maker-4_B_2L-augustus-gene-21.125	0.0811	0.0316	0.389	0.0001	0	0.007	0.1463	0.0013	0.0086	0.0579	0.0006	0.0099	0.1415	0.0023	0.0165	BG
maker-1_C_2R-augustus-gene-33.13	0.0363	1.894	52.1954	0.0288	0.0006	0.0225	0.0001	0	0.0128	0.0001	0	0.0299	0.0001	0	0.0211	BG
maker-3_A_X-augustus-gene-2.106	0.1461	6.8501	46.9016	0.0001	0	0.026	0.0001	0	0	0.0001	0	0	0.0001	0	0	BG
maker-2_E_3R-snap-gene-25.96	0.3781	0.047	0.1243	1.4	0.0028	0.002	3.35	0.0067	0.002	1.4	0.0028	0.002	0.5756	0.0039	0.0068	BG
augustus_masked-4_B_2L-processed-gene-36.8	0.2301	1.1	4.7809	0.0989	0.001	0.01	0.2109	0.0026	0.0121	0.0001	0	0.0036	0.1859	0.0056	0.0299	BG
maker-0_D_3L-augustus-gene-44.113	0.0549	0.0078	0.1422	0.0001	0	0.0091	0.0283	0.0007	0.0262	0.0001	0	0.0046	0.0001	0	0.0227	BG
maker-3_A_X-snap-gene-26.112	0.1203	0.0661	0.5499	0.2047	0.0026	0.0129	0.0457	0.0009	0.0205	0.085	0.0011	0.0126	0.0287	0.0007	0.023	BG
maker-2_E_3R-augustus-gene-11.76	0.0498	2.6705	53.6138	0.0001	0	0.0196	0.0387	0.0013	0.0336	0.084	0.0013	0.0153	0.0607	0.0013	0.0213	BG
maker-2_E_3R-augustus-gene-26.92	0.0826	0.0326	0.3946	0.0001	0	0.0103	0.0553	0.0026	0.0474	0.0382	0.0009	0.023	0.0508	0.0009	0.0175	BG
maker-2_E_3R-augustus-gene-38.128	0.098	0.7474	7.6265	11.7253	0	0	0.0001	0	0.0414	58.9562	0.0091	0.0002	0.0001	0	0.0414	BG
maker-4_B_2L-augustus-gene-46.102	0.4781	0.4804	1.0046	0.0776	0.0041	0.0523	0.8962	0	0	0.1443	0.0058	0.0402	0.7947	0	0	BG
maker-3_A_X-augustus-gene-75.115	0.3086	3.5622	11.5439	0.3164	0.0016	0.0051	0.0248	0.4541	18.3031	0.0487	0.0017	0.0342	0.3668	0.0162	0.0442	BG
maker-3_A_X-augustus-gene-40.80	0.0909	0.0733	0.807	0.0001	0	0.0149	0.0285	0.0012	0.0425	0.1016	0.0024	0.024	0.0001	0	0.0234	BG
maker-4_B_2L-augustus-gene-72.88	0.0412	0.0181	0.4391	0.0885	0.0015	0.0174	0.0125	0.0007	0.0554	0.0449	0.0017	0.0368	0.0221	0.0013	0.06	BG
maker-1_C_2R-augustus-gene-68.103	0.2034	7.883	38.7646	0.1207	0.0027	0.0224	0.0001	0	0.0042	0.0001	0	0.0195	0.0001	0	0	BG
maker-3_A_X-snap-gene-3.100	0.1471	0.1272	0.8651	0.0285	0.0005	0.0191	0.3319	0.0008	0.0024	0.0784	0.0015	0.0191	0.0001	0	0.0016	BG
maker-4_B_2L-augustus-gene-56.120	0.0836	0.0673	0.8058	0.3142	0	0	0.0001	0	0	0.2827	0	0	2.15	0.0043	0.002	BG
maker-0_D_3L-augustus-gene-51.170	0.022	1.2975	59.0119	0.65	0.0013	0.002	0.0001	0	0	0.0001	0	0.0043	0.0001	0	0	BG
maker-1_C_2R-snap-gene-9.185	0.0233	0.0123	0.5281	0.6233	0.0034	0.0055	0.1762	0.0017	0.0099	0.0001	0	0.0104	0.0001	0	0.0059	BG
augustus_masked-2_E_3R-processed-gene-93.6	0.1573	0.0466	0.296	0.0866	0.0009	0.0108	0.1321	0.0031	0.0238	0.1588	0.0018	0.0115	0.1754	0.0013	0.0072	BG
maker-4_B_2L-augustus-gene-40.100	0.0759	0.0123	0.1616	0.0909	0.0044	0.0486	0.0399	0.001	0.0238	0.0001	0	0.0204	0.0629	0.001	0.016	BG
maker-1_C_2R-augustus-gene-79.105	0.0688	0.0303	0.441	0.0001	0	0.013	0.0413	0.0008	0.0185	0.0001	0	0.0207	0.0179	0.0008	0.0428	BG
maker-4_B_2L-augustus-gene-47.115	0.0672	0	0	0.0928	0.0025	0.0265	0.0928	0.0025	0.0265	0.0881	0.0086	0.0972	0.0001	0	0.0242	BG
maker-1_C_2R-snap-gene-65.123	0.0437	0.0122	0.279	0.1841	0.0023	0.0125	0.0529	0.0009	0.0165	0.0001	0	0.0071	0.0836	0.0008	0.0092	BG
augustus_masked-2_E_3R-processed-gene-105.23	0.0191	0.0217	1.1367	0.0532	0.0006	0.011	0.0001	0	0.0185	0.0231	0.0006	0.0253	0.0001	0	0.0166	BG
maker-0_D_3L-snap-gene-31.143	0.1793	0.0406	0.2262	0.0158	0.0003	0.0219	0.1688	0.0041	0.0243	0.0176	0.0003	0.0174	0.0276	0.0014	0.0519	BG
maker-4_B_2L-snap-gene-11.70	0.0666	0.0036	0.0542	0.026	0.0004	0.0172	0.0691	0.0041	0.0595	0.0438	0.0007	0.0171	NA	NA	NA	BG
snap_masked-4_B_2L-processed-gene-38.59	0.0397	0.0276	0.6938	0.0001	0	0.0177	0.0001	0	0	0.0001	0	0	0.0001	0	0	BG
snap_masked-1_C_2R-processed-gene-10.55	0.2437	0.2954	1.212	0.0001	0	0.0076	0.292	0.0023	0.008	0.0438	0.0012	0.0263	0.0001	0	0	BG
maker-0_D_3L-augustus-gene-72.99	0.1422	0.0368	0.2585	0.0854	0.0018	0.0213	0.3081	0.0044	0.0143	0.0001	0	0.005	0.0197	0.0005	0.0278	BG
maker-2_E_3R-augustus-gene-11.7	0.0657	3.0737	46.7678	0.0001	0	0.0053	0.0001	0	0.0051	0.0001	0	0	0.0001	0	0.0228	BG
maker-2_E_3R-snap-gene-97.87	0.0395	0.0275	0.6958	0.0453	0.001	0.0219	0.0001	0	0	0.0305	0.001	0.0312	0.0001	0	0	BG
snap_masked-0_D_3L-processed-gene-36.70	0.1755	0.5419	3.0883	0.1452	0.002	0.0136	2.25	0.0045	0.002	0.1247	0.0033	0.0265	0.0001	0	0.0242	BG
maker-2_E_3R-augustus-gene-33.12	0.0662	1.9161	28.9519	0.0001	0	0.0092	0.0301	0.0008	0.0255	0.0001	0	0.0185	0.0686	0.0024	0.0348	BG
maker-2_E_3R-augustus-gene-21.104	0.016	0.0001	0.0081	0.0001	0	0.0087	0.0664	0.001	0.0144	0.0001	0	0.0049	0.0001	0	0.0164	BG
maker-0_D_3L-augustus-gene-79.146	0.0893	0.0156	0.1749	1.15	0.0023	0.002	0.0001	0	0.1578	0.0001	0	0.0044	0.0001	0	0.1578	BG
augustus_masked-0_D_3L-processed-gene-47.26	0.0769	0.0172	0.2238	0.0001	0	0.0101	0.0078	0.0001	0.0108	0.0001	0	0.0057	0.0236	0.0004	0.0165	BG
snap_masked-2_E_3R-processed-gene-11.42	0.0735	0.0356	0.4834	0.0001	0	0.0067	0.0001	0	0.0457	0.0001	0	0.0145	0.0001	0	0.0193	BG
maker-3_A_X-augustus-gene-5.73	0.1483	0.0848	0.5718	0.1557	0.0012	0.0075	0.1658	0.0016	0.0094	0.2598	0.0038	0.0144	0.0001	0	0.0182	BG
maker-0_D_3L-snap-gene-68.9	0.1616	0.0135	0.0835	0.1283	0.0046	0.0359	0.1283	0.0046	0.0359	0.2888	0.0107	0.0369	0.0579	0.0032	0.056	BG
maker-4_B_2L-augustus-gene-41.70	0.0203	0.0009	0.0423	0.0001	0	0.0172	0.0001	0	0.012	0.0001	0	0.0034	0.0001	0	0.0152	BG
maker-4_B_2L-augustus-gene-38.99	0.0875	0.0556	0.6362	0.0001	0	0.0164	0.1009	0.0021	0.0204	0.1096	0.002	0.0187	2.05	0.0041	0.002	BG
maker-0_D_3L-augustus-gene-77.65	0.0978	0.047	0.481	0.1678	0.0008	0.0048	0.0178	0.0003	0.0171	0.0508	0.0005	0.009	0.0389	0.0007	0.0168	BG
maker-1_C_2R-snap-gene-82.134	0.0703	0.018	0.2563	0.0001	0	0.005	0.0494	0.0011	0.0225	0.0008	0	0.0178	0.0301	0.0007	0.0242	BG
snap_masked-2_E_3R-processed-gene-28.4	0.1671	0.0628	0.3757	0.0268	0.0005	0.0169	0.1669	0.0048	0.0287	0.2111	0.0017	0.0083	0.0776	0.002	0.0263	BG
snap_masked-4_B_2L-processed-gene-62.39	0.0303	1.9262	63.6452	0.0001	0	0.0092	0.0001	0	0.0232	0.0594	0.001	0.0166	0.0001	0	0.0407	BG
maker-3_A_X-augustus-gene-26.87	0.2645	0.0597	0.2256	0.8659	0.0083	0.0095	0.0001	0	0	3.25	0.0065	0.002	0.0001	0	0	BG
maker-0_D_3L-augustus-gene-47.119	0.1406	0.8862	6.3045	0.5	0.001	0.002	0.0001	0	0	0.1501	0.0018	0.0119	0.0001	0	0	BG
augustus_masked-0_D_3L-processed-gene-18.37	0.1458	0.0896	0.6149	0.0001	0	0.0157	0.0001	0	0.0351	0.1878	0.0021	0.011	0.0714	0.0039	0.055	BG
maker-2_E_3R-snap-gene-92.126	0.44	0.1319	0.2998	1.0157	0.0037	0.0037	0.0001	0	0.0063	0.1731	0.0012	0.0072	0.0001	0	0.0125	BG
maker-4_B_2L-augustus-gene-29.78	0.0732	0.0299	0.4078	0.531	0	0	0.0001	0	0.0092	0.279	0.0047	0.017	0.0001	0	0.0083	BG
maker-0_D_3L-augustus-gene-13.126	0.4848	0.0079	0.0162	0.3821	0.0082	0.0213	0.0001	0	0.0311	0.5911	0.0141	0.0238	3.15	0.0063	0.002	BG
maker-0_D_3L-augustus-gene-41.14	0.286	0.1531	0.5353	0.2011	0.0035	0.0174	0.5947	0.0044	0.0075	0.2177	0.0029	0.0135	0.3464	0.0024	0.0069	BG
maker-2_E_3R-augustus-gene-37.132	0.0825	0.0353	0.4281	0.093	0.0011	0.0119	0.0739	0.0028	0.0382	0.0537	0.0016	0.0302	0.0441	0.0023	0.0512	BG
maker-2_E_3R-augustus-gene-23.98	0.0961	0.0074	0.077	0.0733	0.004	0.0543	0.0733	0.004	0.0543	0.1338	0.0053	0.0395	0.0301	0.0017	0.0564	BG
maker-2_E_3R-augustus-gene-29.90	0.0141	0.888	62.9753	0.0001	0	0.0164	0.0001	0	0.0107	0.0001	0	0.0129	0.0001	0	0.0102	BG
maker-2_E_3R-augustus-gene-81.138	0.0469	0.9554	20.3782	0.0001	0	0.0116	0.0001	0	0.0344	0.0001	0	0.0051	0.0001	0	0.0288	BG
snap_masked-2_E_3R-processed-gene-23.27	0.2764	0.1026	0.3711	0.1923	0.0032	0.0164	0.1937	0.0038	0.0199	0.3461	0.004	0.0115	0.1412	0.0025	0.0177	BG
maker-4_B_2L-augustus-gene-2.104	0.1974	0.0471	0.2388	0.4282	0	0	0.0903	0.0014	0.0157	0	0	0.002	0.0001	0	0.0133	BG
maker-4_B_2L-augustus-gene-40.109	0.0571	0.0289	0.5058	0.0001	0	0.0114	0.037	0.0022	0.0595	0.0001	0	0.0141	0.0324	0.0015	0.0472	BG
maker-3_A_X-augustus-gene-33.122	0.083	0.0308	0.3715	0.0001	0	0.025	0.0001	0	0	0.0001	0	0.0032	0.0001	0	0.0137	BG
augustus_masked-1_C_2R-processed-gene-3.2	0.0614	0.0579	0.944	0.0001	0	0.0068	0.0001	0	0.0158	0.0001	0	0.0068	0.0001	0	0.0159	BG
maker-2_E_3R-augustus-gene-40.79	0.1635	0.1361	0.8322	0.231	0.0018	0.0078	0.55	0.0011	0.002	0.1161	0.0009	0.0077	0.0869	0.0015	0.0175	BG
maker-0_D_3L-augustus-gene-19.94	0.193	0.0911	0.4721	0.0001	0	0.0045	0.3883	0.0004	0.001	0.0872	0.0012	0.0135	0.0001	0	0.0044	BG
maker-3_A_X-augustus-gene-57.9	0.2802	2.5715	9.1769	1.15	0.0023	0.002	0.1918	0.006	0.0311	0.9921	0.0062	0.0062	0.0587	0.0021	0.035	BG
maker-4_B_2L-augustus-gene-78.97	0.1046	0.0293	0.2797	0.0001	0	0.0111	0.0568	0.0015	0.0271	0.0001	0	0.0092	0.0372	0.0006	0.0162	BG
maker-0_D_3L-augustus-gene-70.96	0.0506	1.0443	20.6378	0.0001	0	0.0106	0.0001	0	0.0362	0.0001	0	0	0.1008	0.003	0.0298	BG
maker-4_B_2L-augustus-gene-83.113	0.2798	0	0	0.0452	0.0013	0.0293	0.32	0.024	0.0749	0.1133	0.0021	0.0188	NA	NA	NA	BG
maker-4_B_2L-augustus-gene-21.148	0.0086	0.6068	70.596	0.3496	0	0	0.0001	0	0	0.0001	0	0.024	0.0001	0	0.0241	BG
maker-2_E_3R-augustus-gene-60.122	0.0785	0.0243	0.3096	0.2181	0.0018	0.0084	0.0001	0	0.0122	0.0001	0	0.0117	0.0001	0	0.0128	BG
augustus_masked-3_A_X-processed-gene-80.9	0.1323	0.0491	0.3709	0.0001	0	0.015	0.0001	0	0	0.3544	0	0	0.0001	0	0	BG
maker-2_E_3R-augustus-gene-53.118	0.1679	0.0708	0.4217	0.0735	0.0011	0.0146	0.0396	0.0016	0.0394	0.2664	0.0045	0.017	0.0678	0.0009	0.0129	BG
maker-3_A_X-snap-gene-86.70	0.178	0.1404	0.789	0.7216	0.0026	0.0036	0.3202	0.0092	0.0288	0.0995	0.0013	0.0135	5.2899	0	0	BG
maker-4_B_2L-augustus-gene-56.147	0.0841	0.046	0.5476	0.2405	0.0006	0.0025	0.1412	0.0007	0.0049	0.6127	0.003	0.0049	0.1995	0.0006	0.003	BG
maker-3_A_X-augustus-gene-81.45	0.0889	0.0388	0.4359	0.0001	0	0.0128	0.2405	0.004	0.0167	0.1102	0.002	0.0181	0.1525	0.001	0.0065	BG
maker-0_D_3L-augustus-gene-44.112	0.1589	0.0702	0.4415	2.4	0.0048	0.002	0.0001	0	0.0111	0.2348	0.0038	0.0164	0.2544	0.0016	0.0063	BG
maker-4_B_2L-augustus-gene-70.135	0.0946	0.0558	0.5901	0.0001	0	0	0.1679	0.0014	0.0083	0.0001	0	0	0.2231	0.0026	0.0117	BG
augustus_masked-3_A_X-processed-gene-53.5	0.1698	0.0671	0.3951	2.1	0.0042	0.002	0.0001	0	0.0286	0.1091	0.0025	0.0225	0.0001	0	0.008	BG
maker-1_C_2R-augustus-gene-12.114	0.1961	0.0826	0.421	0.1074	0.0011	0.0102	0.2031	0.0023	0.0113	0.0634	0.0012	0.0183	0.0686	0.0012	0.0182	BG
maker-0_D_3L-snap-gene-84.13	0.1759	0.1185	0.6738	0.2156	0.0045	0.0208	0.0345	0.0015	0.0448	0.1614	0.003	0.0185	0.9088	0.0045	0.0049	BG
maker-0_D_3L-augustus-gene-27.126	0.0509	2.8656	56.3381	0.0001	0	0.0055	0.1691	0.0033	0.0193	0.0001	0	0.0056	0.0001	0	0.0244	BG
maker-1_C_2R-snap-gene-36.93	0.7961	0.301	0.3781	0.2097	0	0	0.2869	0.3128	1.0904	0.0001	0	0.0074	0.2869	0.3128	1.0904	BG
maker-2_E_3R-augustus-gene-40.77	0.0764	0.2282	2.9851	0.0001	0	0.0252	0.0805	0.0013	0.0165	0.0001	0	0.0158	0.0879	0.0025	0.028	BG
maker-1_C_2R-augustus-gene-50.98	0.0905	0.6666	7.3682	0.0001	0	0.0069	44.4692	0.0041	0.0001	0.0354	0.0013	0.0381	0.1641	0.0085	0.0516	BG
maker-6_F_4-augustus-gene-3.57	0.0445	0.9941	22.3331	0.0001	0	0.0054	0.0001	0	0	0	0	0.002	0.45	0.0009	0.002	BG
maker-0_D_3L-augustus-gene-51.169	0.333	0.1379	0.4141	0.0001	0	0.0136	0.0001	0	0	2.58	0	0	0.297	0	0	BG
maker-2_E_3R-snap-gene-84.146	0.1786	1.035	5.7935	0.1706	0.0021	0.0125	0.0733	0.0027	0.037	0.1147	0.0025	0.0219	0.1371	0.0046	0.0337	BG
maker-1_C_2R-augustus-gene-82.94	0.1118	5.0163	44.882	0.0001	0	0	1.3	0.0026	0.002	0.0001	0	0.0132	0.0001	0	0.0074	BG
augustus_masked-4_B_2L-processed-gene-69.6	0.6273	0.0078	0.0124	0.5142	0	0	1.3667	0.0222	0.0163	0.3978	0	0	1.3669	0.0222	0.0163	BG
maker-1_C_2R-augustus-gene-31.90	0.6888	0.1528	0.2218	0.7275	0.0036	0.005	0.8237	0.0894	0.1085	1.0466	0.0108	0.0103	NA	NA	NA	BG
maker-1_C_2R-augustus-gene-41.109	0.0763	0.0118	0.1546	0.1136	0.0029	0.0258	0.0552	0.0011	0.019	0.6125	0.001	0.0016	NA	NA	NA	BG
augustus_masked-2_E_3R-processed-gene-47.10	0.0289	1.7368	60.0233	0.0001	0	0.0161	0.0152	0.0004	0.0267	0.0001	0	0.02	0.0412	0.0012	0.0297	BG
maker-0_D_3L-augustus-gene-16.	0.1033	1.1108	10.7524	0.4083	0	0	0.0001	0	0.0134	1	0.002	0.002	0.0608	0.002	0.0333	BG
maker-1_C_2R-augustus-gene-59.107	0.1895	0.1049	0.5537	0.1601	0.0021	0.013	0.1174	0	0	0.0001	0	0.004	0.0001	0	0	BG
maker-1_C_2R-augustus-gene-67.108	0.0883	4.4937	50.8879	0.2315	0.0035	0.015	0.0001	0	0.0177	0.0001	0	0.0151	0.0001	0	0.0108	BG
snap_masked-4_B_2L-processed-gene-38.58	0.7977	0.2544	0.3189	0.3469	0	0	0.0001	0	0.0119	0.3632	0	0	0.3468	0	0	BG
maker-4_B_2L-augustus-gene-9.82	0.0943	0.0331	0.3513	0.0001	0	0.0225	3.45	0.0069	0.002	0.0001	0	0	0.0001	0	0	BG
maker-0_D_3L-augustus-gene-72.105	0.1689	7.1016	42.037	0.55	0.0011	0.002	0.0001	0	0	0.0001	0	0.0094	0.0001	0	0.0124	BG
maker-2_E_3R-augustus-gene-66.55	0.0215	1.2101	56.3239	0.0001	0	0.0367	0.0255	0.0017	0.0653	0.0001	0	0.0605	0.0309	0.0022	0.0718	BG
maker-0_D_3L-augustus-gene-76.94	0.0863	0.0654	0.7585	0.0001	0	0.0038	0.0657	0.0024	0.0373	0.0595	0.0007	0.0121	0.0852	0.0025	0.0292	BG
snap_masked-4_B_2L-processed-gene-36.46	0.1534	0.0716	0.4668	0.1459	0.0014	0.0097	0.4544	0.0064	0.0141	0.1396	0.0016	0.0114	0.3011	0.0177	0.0586	BG
maker-3_A_X-augustus-gene-18.66	0.1334	0.0525	0.3934	0.0001	0	0.0096	0.0001	0	0	0.4228	0	0	0.27	0	0	BG
maker-3_A_X-augustus-gene-105.37	0.2784	0.1856	0.6667	0.0001	0	0.0033	0.2141	0	0	0.0001	0	0.0034	0.0001	0	0	BG
maker-1_C_2R-augustus-gene-4.82	0.0497	0.0114	0.2299	0.0604	0.0012	0.0195	1.0192	0.001	0.0009	0.0288	0.0006	0.0203	0.0001	0	0	BG
maker-1_C_2R-augustus-gene-71.185	0.0369	0.0129	0.3486	0.0176	0.0005	0.0275	0.0001	0	0	0.036	0.001	0.0269	0.0001	0	0	BG
maker-2_E_3R-augustus-gene-38.126	0.1141	2.7054	23.712	0.088	0.0023	0.0263	0.2264	0.0022	0.0097	0.124	0.0029	0.0238	0.1243	0.0026	0.0209	BG
maker-4_B_2L-augustus-gene-2.86	0.1384	0.0815	0.5889	0.6236	0.0012	0.0019	0.1375	0.0012	0.0084	0.2106	0.0023	0.011	0.3329	0.0035	0.0105	BG
maker-1_C_2R-augustus-gene-50.97	0.1067	3.2847	30.7847	0.163	0.0014	0.0083	0.0001	0	0	0.1535	0.0014	0.0088	0.0001	0	0	BG
snap_masked-2_E_3R-processed-gene-1.75	0.0782	0.0189	0.2411	0.1477	0.0015	0.01	0.0001	0	0.0313	0.9208	0.0045	0.0048	0.0881	0.0029	0.0331	BG
maker-2_E_3R-augustus-gene-59.153	0.6704	1.0038	1.4973	0.0001	0	0.0077	0.0001	0	0.0035	0.1554	0.0012	0.0077	32.4809	0.0048	0.0001	BG
maker-3_A_X-augustus-gene-22.66	0.0769	0.0346	0.45	0.2651	0.0018	0.0069	0.0001	0	0.0168	0.1005	0.0018	0.0182	0.032	0.0018	0.0547	BG
maker-3_A_X-snap-gene-60.88	0.1342	6.8421	50.9919	0.2706	0.0042	0.0155	0.3811	0	0	0.1355	0.0021	0.0154	0.0001	0	0.0083	BG
snap_masked-5_U_U-processed-gene-1.28	0.1574	0.0789	0.5012	0.31	0.0088	0.0284	0.0512	0.001	0.0186	0.1603	0.0015	0.0097	0.0478	0.0014	0.0291	BG
augustus_masked-4_B_2L-processed-gene-48.9	0.0384	0.021	0.5464	0.0382	0.0005	0.0129	0.0001	0	0	0.0132	0.0005	0.0373	0.0001	0	0	BG
maker-0_D_3L-snap-gene-56.100	0.0992	4.1259	41.6113	0.3221	0.0039	0.0121	0.6311	0.0025	0.0039	0.6723	0.0057	0.0085	0.0001	0	0.0194	BG
maker-2_E_3R-augustus-gene-10.96	0.1069	0.0455	0.4255	0.0001	0	0.0043	0.0001	0	0.0505	0.0889	0.0019	0.0208	0.0238	0.0009	0.0389	BG
augustus_masked-4_B_2L-processed-gene-39.6	0.0442	0.0242	0.5477	0.0001	0	0.0132	0.0001	0	0.0206	0.0001	0	0.0219	0.0001	0	0.037	BG
maker-4_B_2L-augustus-gene-59.12	0.102	2.5742	25.2467	0.0001	0	0.0116	0.2098	0	0	0.0001	0	0.009	0.0001	0	0	BG
maker-0_D_3L-augustus-gene-6.60	0.0289	0.8991	31.1519	0.0001	0	0	0.0001	0	0.0217	0.0001	0	0.0048	0.0001	0	0.0144	BG
maker-4_B_2L-augustus-gene-96.65	0.1756	4.2147	24.0009	1.2446	0.0069	0.0055	0.3	0.0017	0.0057	0.131	0.0035	0.0268	0.0001	0	0	BG
maker-1_C_2R-augustus-gene-34.92	0.3012	0.1103	0.3663	0.2425	0.0073	0.0301	0.1085	0.0025	0.0227	0.7077	0.0047	0.0066	0.1271	0.0042	0.0331	BG
maker-2_E_3R-snap-gene-59.2	0.0535	0.0074	0.1381	0.0001	0	0.0131	0.0198	0.5099	25.8073	0.2208	0.0029	0.0131	0.038	0.0032	0.0846	BG
augustus_masked-4_B_2L-processed-gene-43.18	0.076	0.0545	0.7177	0.0539	0.001	0.0177	0.0001	0	0.0018	0.0543	0.0016	0.029	0.0001	0	0.0026	BG
augustus_masked-0_D_3L-processed-gene-33.2	0.0235	0.3487	14.8507	0.0001	0	0.0318	0.0353	0.0014	0.0383	0.0001	0	0.0318	0.0001	0	0.0324	BG
maker-58_U_U-augustus-gene-0.6	0.1765	1.0636	6.0271	0.3535	0	0	0.0001	0	0.0126	0.439	0	0	0.4305	0	0	BG
maker-1_C_2R-augustus-gene-80.116	0.0828	0.0547	0.6603	0.0001	0	0.008	0.5643	0.0344	0.061	0.0639	0.0008	0.0118	0.1101	0.0061	0.0557	BG
maker-2_E_3R-augustus-gene-93.52	0.0196	1.1451	58.5244	0.031	0.0004	0.0127	0.0001	0	0.0167	0.0637	0.0007	0.0106	0.0001	0	0.011	BG
maker-2_E_3R-snap-gene-81.196	0.1133	0.0449	0.3962	0.0001	0	0.0039	0.0001	0	0	0.0001	0	0.0113	2.95	0.0059	0.002	BG
maker-0_D_3L-augustus-gene-61.94	0.0563	2.7852	49.4949	0.0001	0	0.0047	0.0921	0.0025	0.0276	0.0001	0	0.0225	0.0463	0.002	0.044	BG
maker-1_C_2R-augustus-gene-59.79	0.063	0.0417	0.6615	0.1761	0.0011	0.0063	0.0001	0	0	0.057	0.0011	0.0195	0.0001	0	0	BG
augustus_masked-2_E_3R-processed-gene-51.30	0.0806	0.0424	0.5258	0.246	0	0	0.0001	0	0.0108	0.0001	0	0.0039	0.3728	0.002	0.0053	BG
maker-3_A_X-augustus-gene-38.73	0.4359	0.4511	1.0348	0.0001	0	0.0301	0.0001	0	0	0.0525	0.0019	0.0357	1.8922	0	0	BG
maker-4_B_2L-snap-gene-96.96	0.0755	0	0	0.1436	0.003	0.0211	0.0706	0.0155	0.2196	0.0001	0	0.0079	0.0706	0.0155	0.2196	BG
maker-3_A_X-augustus-gene-43.99	0.2579	7.3362	28.4502	0.3639	0.0041	0.0113	0.4726	0.001	0.0022	0.229	0.002	0.0088	0.9303	0.002	0.0022	BG
maker-4_B_2L-augustus-gene-45.144	0.0971	1.5539	16.0006	0.0001	0	0.006	0.0001	0	0	0.3713	0.0068	0.0184	0.0001	0	0	BG
maker-0_D_3L-augustus-gene-71.95	0.0612	2.4153	39.442	0.1989	0.001	0.0052	0.0001	0	0.0214	0.0437	0.0008	0.0181	0.0001	0	0.0275	BG
maker-2_E_3R-augustus-gene-5.118	0.0746	0.0496	0.6642	0.0001	0	0.0098	0.0868	0.0018	0.0203	0.1466	0.0028	0.0194	0.0765	0.0018	0.0233	BG
maker-3_A_X-augustus-gene-42.93	0.0861	0.0294	0.342	0.0001	0	0.0098	0.0001	0	0.0074	0.0001	0	0.0086	0.1509	0.0005	0.0032	BG
maker-3_A_X-augustus-gene-74.80	0.3213	0.2968	0.9237	0.4255	0	0	0.0001	0	0	0.3304	0.0048	0.0144	0.0001	0	0	BG
maker-2_E_3R-augustus-gene-15.14	0.011	0.761	69.3953	0.0001	0	0.0058	0.0001	0	0.0558	0.0001	0	0.0405	0.0158	0.0008	0.0538	BG
maker-0_D_3L-augustus-gene-26.110	0.1365	0.0608	0.4452	0.0562	0.0009	0.0168	0.2377	0.0086	0.036	0.0982	0.0018	0.018	0.1451	0.0042	0.0291	BG
maker-2_E_3R-augustus-gene-27.10	0.0275	1.1092	40.2761	0.0001	0	0	0.0001	0	0	0.0001	0	0.0072	0.0001	0	0	BG
maker-0_D_3L-augustus-gene-51.172	0.2486	0.0291	0.1171	0.0001	0	0.0128	0.0001	0	0	0.0001	0	0	0.0001	0	0	BG
maker-1_C_2R-augustus-gene-67.99	0.0871	1.6055	18.4388	0.1301	0.0019	0.0149	0.1515	0.0049	0.0321	0.13	0.0019	0.0149	0.0298	0.001	0.0322	BG
maker-0_D_3L-augustus-gene-60.9	0.168	0.0971	0.5781	0.0918	0.001	0.0114	0.0644	0.0011	0.0173	0.0001	0	0.0065	0.0351	0.0005	0.0151	BG
snap_masked-1_C_2R-processed-gene-28.74	0.091	1.0633	11.6823	0.0001	0	0	0.0001	0	0	0.1276	0.0028	0.0218	0.0001	0	0	BG
maker-0_D_3L-augustus-gene-71.113	0.132	0.0475	0.3595	0.0406	0.0008	0.0195	0.0518	0.0022	0.0433	0.2606	0.0044	0.017	0.0348	0.0014	0.0404	BG
maker-0_D_3L-snap-gene-38.19	0.0172	0.0001	0.0032	0.0001	0	0.0078	0.3221	0.0035	0.0108	0.0001	0	0.0083	0.3278	0.0011	0.0035	BG
maker-2_E_3R-augustus-gene-54.102	0.1724	0.0651	0.3777	0.1444	0.0038	0.0265	0.3001	0.0158	0.0528	0.0605	0.0024	0.0404	0.0001	0	0.0212	BG
maker-4_B_2L-augustus-gene-59.120	0.0915	0.0175	0.1917	0.2048	0	0	0.0001	0	0	0.071	0.0031	0.0437	0.0001	0	0	BG
maker-0_D_3L-augustus-gene-27.123	0.0548	0.0152	0.2779	0.0001	0	0.0035	0.0533	0.0007	0.0136	0.0001	0	0.0144	0.2077	0.0012	0.006	BG
maker-1_C_2R-augustus-gene-80.12	0.0602	0.0225	0.3737	0.0001	0	0.0176	0.0766	0.0014	0.0189	0.0001	0	0.035	0.034	0.0007	0.0212	BG
maker-2_E_3R-augustus-gene-62.106	0.018	0.0063	0.3476	0.0001	0	0.0105	0.0001	0	0.0406	0.0001	0	0.0314	0.0001	0	0.0152	BG
maker-0_D_3L-augustus-gene-82.59	0.0569	0.021	0.3682	0.0358	0.0006	0.0168	0.0477	0.0006	0.0119	0.0465	0.0006	0.0135	0.0001	0	0.009	BG
augustus_masked-4_B_2L-processed-gene-92.10	0.0157	0.0038	0.2427	0.0001	0	0.0051	0.0001	0	0.0263	0.0001	0	0.0277	0.0001	0	0.028	BG
maker-4_B_2L-augustus-gene-69.97	0.0332	0.0112	0.3369	0.0001	0	0.0102	0.0412	0.0011	0.0263	0.0001	0	0.0189	0.0312	0.0012	0.0388	BG
maker-3_A_X-augustus-gene-62.74	0.0176	0.0046	0.2633	0.3997	0	0	0.0001	0	0.0059	0.4852	0	0	0.0001	0	0.018	BG
maker-0_D_3L-augustus-gene-34.88	0.0167	0.0035	0.2065	0.0001	0	0.0199	0.0001	0	0.0068	0.0001	0	0.0038	0.0001	0	0.017	BG
snap_masked-2_E_3R-processed-gene-0.4	3.1538	0.0519	0.0165	0.377	0.0047	0.0123	0.1587	0.0058	0.0365	0.3362	0.0022	0.0067	0.1587	0.0058	0.0365	BG
maker-3_A_X-augustus-gene-86.47	0.3688	0.0472	0.1281	1.0231	0.003	0.0029	0.0074	0.0001	0.0187	1	0.002	0.002	0.0001	0	0.0058	BG
maker-2_E_3R-snap-gene-92.143	0.0505	0.0169	0.3353	0.0637	0.0009	0.0145	0.0695	0.0018	0.0263	0.0215	0.0009	0.0429	0.0001	0	0.0587	BG
maker-3_A_X-augustus-gene-77.89	0.0624	0.037	0.5935	0.0999	0.0009	0.0095	0.0001	0	0.0218	0.4224	0.0032	0.0077	0.5	0.001	0.002	BG
maker-2_E_3R-augustus-gene-38.148	0.035	2.0345	58.1801	0.0255	0.0007	0.0258	0.0001	0	0.0217	0.0398	0.0007	0.0166	0.0406	0.0013	0.0323	BG
maker-0_D_3L-augustus-gene-8.80	0.8495	0.774	0.9112	0.4512	0	0	2.35	0.0047	0.002	0.3916	0	0	0.0001	0	0.0322	BG
maker-3_A_X-snap-gene-64.10	0.0245	1.3586	55.4542	0.1301	0.0022	0.0169	0.0001	0	0.0118	0.0001	0	0.0211	0.0001	0	0.0191	BG
maker-3_A_X-augustus-gene-77.103	0.1641	1.1264	6.866	0.0001	0	0.0071	0.0001	0	0.0086	0.0001	0	0.0071	0.0001	0	0.0043	BG
maker-2_E_3R-augustus-gene-60.13	0.1981	1.0864	5.4834	0.1572	0.0034	0.0213	0.0801	0.0019	0.0241	0.1458	0.0043	0.0296	0.0001	0	0.0173	BG
maker-4_B_2L-snap-gene-82.115	0.1194	0.1178	0.986	0.057	0.0019	0.0341	0.0001	0	0.0101	0.0001	0	0.0177	0.0229	0.0008	0.0356	BG
snap_masked-0_D_3L-processed-gene-39.99	0.1178	0.0714	0.6061	0.1017	0.0012	0.0116	0.0001	0	0.0268	0.071	0.0012	0.0165	0.0001	0	0.0534	BG
maker-0_D_3L-snap-gene-47.142	0.1716	0.0668	0.3891	0.0971	0.0007	0.0077	0.0562	0.0007	0.0125	0.1776	0.0031	0.0175	0.1562	0.0036	0.0229	BG
maker-3_A_X-augustus-gene-87.54	0.0316	0.0125	0.3969	0.031	0.0006	0.0189	0.0249	0.0004	0.0153	0.0353	0.0006	0.0166	0.0404	0.0006	0.014	BG
maker-3_A_X-snap-gene-76.92	0.0916	1.6132	17.6081	0.0001	0	0.0089	0.9299	0	0	0.2196	0.0021	0.0097	0.0001	0	0	BG
maker-4_B_2L-augustus-gene-43.84	0.1262	0.0659	0.5222	0.1245	0.0007	0.0055	0.3263	0.0013	0.0041	0.3831	0.0016	0.0043	0.2512	0.0018	0.007	BG
maker-2_E_3R-augustus-gene-16.106	0.0824	0.0065	0.0786	0.0001	0	0.0083	0.2472	0.4464	1.8057	0.0001	0	0.0062	0.0914	0.0048	0.0523	BG
maker-2_E_3R-snap-gene-101.100	0.0318	0.0142	0.4455	0.0342	0.0004	0.0111	0.2	0.0004	0.002	0.0205	0.0004	0.0185	0.0001	0	0	BG
maker-2_E_3R-augustus-gene-5.130	0.1514	0	0	0.1039	0.0012	0.0118	0.0729	0.002	0.0281	0.0173	0.0004	0.0233	0.1564	0.0025	0.0162	BG
augustus_masked-2_E_3R-processed-gene-71.33	0.6441	0.7077	1.0987	0.0001	0	0.0234	0.0001	0	0.0246	0.3057	0	0	2	0.004	0.002	BG
maker-4_B_2L-augustus-gene-68.56	0.2901	1.1034	3.8032	3	0.006	0.002	0.0001	0	0	2.95	0.0059	0.002	0.1388	0.0029	0.0211	BG
augustus_masked-2_E_3R-processed-gene-105.3	0.0838	0.0453	0.5412	0.0001	0	0.0145	0.0001	0	0.0115	0.0201	0.0005	0.0249	0.0001	0	0.0186	BG
maker-1_C_2R-snap-gene-49.74	0.4843	0.8167	1.6864	0.3295	0	0	0.0001	0	0	0.2506	0	0	0.3004	0	0	BG
maker-0_D_3L-augustus-gene-70.90	0.6815	14.961	21.9524	1.55	0.0031	0.002	0.0001	0	0.0044	0.1141	0.0023	0.0202	0.2473	0.001	0.0041	BG
maker-0_D_3L-augustus-gene-75.107	0.0302	1.7473	57.9358	0.0001	0	0.0201	0.1156	0.0035	0.03	0.0001	0	0.029	0.0389	0.0023	0.0594	BG
maker-2_E_3R-augustus-gene-16.124	0.0392	2.4261	61.9286	0.1819	0.002	0.0112	0.0001	0	0.014	0.0001	0	0.0392	0.0001	0	0.0231	BG
maker-3_A_X-augustus-gene-7.73	0.3447	0.165	0.4788	0.3365	0.0028	0.0084	0.0001	0	0.0156	0.3178	0.0058	0.0181	0.0234	0.0006	0.0265	BG
maker-0_D_3L-snap-gene-16.127	0.3653	2.3018	6.301	5.5686	0	0	7.0638	0	0	0.1156	0.0898	0.777	0.0001	0	0.0107	BG
maker-2_E_3R-augustus-gene-45.93	0.1172	1.1979	10.2219	0.0621	0.0006	0.01	0.0937	0.003	0.0317	0.0001	0	0.0206	0.1443	0.0053	0.0366	BG
maker-0_D_3L-augustus-gene-59.95	0.1288	0.0772	0.5992	0.0843	0.0009	0.0111	0.1816	0.0078	0.0427	0.0655	0.002	0.0302	0.1286	0.0088	0.0685	BG
maker-3_A_X-augustus-gene-61.86	0.2244	0.1563	0.6963	0.0001	0	0.0036	0.2348	0.0041	0.0175	0.058	0.0014	0.0236	0.0001	0	0.0083	BG
maker-3_A_X-augustus-gene-28.96	0.462	0.7025	1.5203	0.0001	0	0.0124	0.0001	0	0.0151	0.0001	0	0.0124	0.0001	0	0.0302	BG
maker-0_D_3L-augustus-gene-49.133	0.0919	0.0007	0.0078	0.0001	0	0.0051	0.75	0.0015	0.002	0.0001	0	0.0107	0.0001	0	0	BG
maker-2_E_3R-augustus-gene-46.114	0.0552	1.0378	18.8015	0.1888	0.0018	0.0098	0.0001	0	0.0175	0.0639	0.0019	0.029	0.0754	0.0039	0.0513	BG
augustus_masked-3_A_X-processed-gene-18.24	0.2147	0.2354	1.0966	0.0587	0.0013	0.0226	0.0001	0	0	0.0615	0.0017	0.0277	0.0001	0	0	BG
maker-2_E_3R-augustus-gene-33.122	0.1675	0.073	0.4359	0.0001	0	0	0.1388	0.0032	0.0233	0.0001	0	0.0138	0.0756	0.0014	0.0188	BG
maker-1_C_2R-augustus-gene-33.112	0.2235	0.1512	0.6767	0.414	0.0032	0.0078	0.074	0.004	0.0538	0.1502	0.0019	0.0123	0.0588	0.0018	0.0298	BG
maker-4_B_2L-augustus-gene-33.108	0.103	0.0314	0.3043	0.0001	0	0.0101	0.1154	0.0044	0.0385	0.0001	0	0.0094	0.0001	0	0.0367	BG
maker-3_A_X-augustus-gene-33.133	0.2087	0.0677	0.3246	0.0001	0	0.0027	0.3127	0.0091	0.0292	0.0001	0	0.0048	0.0001	0	0.0014	BG
augustus_masked-68_U_U-processed-gene-0.0	0.0673	0.0529	0.7866	0.0001	0	0.0311	0.0279	0.0015	0.0531	0.0001	0	0.0194	0.0181	0.0015	0.0827	BG
snap_masked-2_E_3R-processed-gene-14.79	1.0085	0.1193	0.1182	0.9978	0.0042	0.0042	0.3261	0.0223	0.0684	5.1958	0.0107	0.0021	NA	NA	NA	BG
maker-2_E_3R-snap-gene-40.103	0.1449	0.075	0.5178	0.1035	0.0021	0.0201	0.1083	0.0037	0.0338	0.0731	0.0016	0.0213	0.0001	0	0.0228	BG
augustus_masked-1_C_2R-processed-gene-71.5	0.0324	0	0	0.0001	0	0.0143	0.0001	0	0.0888	0.0001	0	0.01	0.0001	0	0.0888	BG
maker-4_B_2L-augustus-gene-33.106	0.2467	0.0883	0.3581	0.1968	0.0005	0.0027	0.6206	0.004	0.0065	0.1383	0.0016	0.0115	0.6321	0.0033	0.0053	BG
maker-0_D_3L-augustus-gene-2.57	0.0729	0.2354	3.2289	0.2873	0.0013	0.0046	0.0001	0	0.0153	0.0001	0	0.0181	0.65	0.0013	0.002	BG
maker-2_E_3R-snap-gene-67.209	0.0681	0.0289	0.4238	0.0418	0.0007	0.0177	0.0001	0	0.0161	0.0829	0.0018	0.0217	0.0066	0.0002	0.029	BG
maker-1_C_2R-augustus-gene-37.120	0.0628	1.6307	25.9841	0.3027	0.0054	0.0178	0.013	0.0007	0.0541	0.0094	0.3548	37.7574	0.0539	0.0035	0.0646	BG
maker-3_A_X-snap-gene-25.122	0.1247	0.0687	0.5508	0.0927	0.0018	0.0199	0.1328	0.0005	0.0038	0.1049	0.0019	0.0177	0.2156	0.0007	0.0031	BG
maker-1_C_2R-augustus-gene-80.124	0.0403	0.0704	1.745	0.0994	0.0009	0.0086	0.0001	0	0	0.0774	0.0017	0.0221	0.0001	0	0	BG
maker-3_A_X-augustus-gene-46.86	0.1089	1.1369	10.4434	0.135	0.0025	0.0189	0.0001	0	0	0.0869	0.0025	0.0292	0.65	0.0013	0.002	BG
maker-0_D_3L-augustus-gene-76.93	0.2801	1.3183	4.706	0.2828	0.0019	0.0069	0.2583	0.002	0.0076	0.0907	0.002	0.0216	0.0001	0	0.0066	BG
maker-1_C_2R-augustus-gene-26.105	0.4921	0.1059	0.2152	0.0001	0	0.0224	0.0001	0	0.0224	26.45	0.0529	0.002	0.0001	0	0.0146	BG
maker-3_A_X-augustus-gene-87.50	0.1401	0.223	1.5914	0.0001	0	0.0392	0.0393	0.001	0.0244	0.0001	0	0.0485	0.0001	0	0.0102	BG
augustus_masked-0_D_3L-processed-gene-23.10	0.1125	0	0	0.0001	0	0.0184	0.0001	0	0.048	0.0001	0	0	0.0001	0	0.0299	BG
augustus_masked-1_C_2R-processed-gene-7.3	0.0764	0.0221	0.2892	0.0001	0	0.0106	0.0595	0.0012	0.0201	0.4016	0.0026	0.0064	0.0001	0	0.0281	BG
augustus_masked-2_E_3R-processed-gene-22.5	0	0	0.071	NA	NA	NA	NA	NA	NA	NA	NA	NA	NA	NA	NA	BG
maker-0_D_3L-snap-gene-82.66	0.0584	0.0258	0.4417	0.0001	0	0.0038	0.0001	0	0.0054	0.0001	0	0.003	0.0001	0	0.015	BG
maker-4_B_2L-augustus-gene-67.88	0.0407	0.014	0.3433	0.0931	0.0018	0.0195	0.0001	0	0.0122	0.0001	0	0.0159	0.0001	0	0.0365	BG
maker-3_A_X-augustus-gene-76.8	0.0142	0.8127	57.2383	0.0001	0	0.0153	0.0001	0	0.028	0.0001	0	0.0306	0.0001	0	0.0233	BG
maker-2_E_3R-augustus-gene-38.149	0.0218	1.3845	63.6283	0.0001	0	0.0187	0.0001	0	0.008	0.0001	0	0.0379	0.0001	0	0.0074	BG
maker-2_E_3R-augustus-gene-60.130	0.1334	0.0667	0.5002	0.1886	0.002	0.0105	0.087	0.0021	0.0241	0.2477	0.005	0.0201	0.1205	0.0022	0.018	BG
maker-2_E_3R-augustus-gene-70.70	0.493	0.2078	0.4214	0.314	0.0022	0.0068	0.518	0.0223	0.043	0.1138	0.0032	0.0281	0.304	0.0097	0.0319	BG
maker-4_B_2L-augustus-gene-24.89	0.1095	0.0401	0.3661	0.0534	0.0007	0.0122	0.0686	0.0023	0.0331	0.1252	0.0029	0.0232	0.0261	0.0009	0.0344	BG
augustus_masked-4_B_2L-processed-gene-9.0	0.0245	0.0153	0.6248	0.0339	0.0005	0.0158	0.0001	0	0.0301	0.0001	0	0.0245	0.0298	0.0005	0.0179	BG
maker-3_A_X-augustus-gene-59.99	0.0474	0.0462	0.974	0.0001	0	0.0168	0.0211	0.0009	0.0419	0.0001	0	0.0299	0.0001	0	0.023	BG
augustus_masked-3_A_X-processed-gene-71.18	0.06	2.9397	48.9965	0.0001	0	0.0265	0.0001	0	0.0031	0.1028	0.0014	0.0136	0.0001	0	0.0147	BG
maker-2_E_3R-augustus-gene-88.69	0.0976	2.0482	20.9913	0.0207	0.0008	0.0366	0.0303	0.0015	0.0503	0.1334	0.0023	0.0175	0.1065	0.0037	0.035	BG
augustus_masked-3_A_X-processed-gene-86.2	0.3998	0.4946	1.2371	0.3676	0.0079	0.0215	0.949	0.0041	0.0043	0.5158	0.0071	0.0137	0.2183	0.0035	0.0162	BG
maker-2_E_3R-augustus-gene-51.152	0.083	0.0293	0.3536	0.0001	0	0.0181	0.0001	0	0	0.0001	0	0.0182	0.0001	0	0	BG
maker-0_D_3L-snap-gene-56.123	0.0912	1.3179	14.4482	0.1587	0.0008	0.005	0.0856	0.0011	0.0129	0.0001	0	0.0111	0.041	0.0007	0.0173	BG
maker-1_C_2R-augustus-gene-40.126	0.0158	1.0644	67.158	0.0001	0	0.0083	0.0001	0	0	0.0001	0	0	0.0001	0	0	BG
maker-3_A_X-augustus-gene-86.55	0.0638	0.0507	0.7938	0.0001	0	0.0125	0.0913	0.0011	0.0117	0.1117	0.0011	0.0096	0.1159	0.0011	0.0092	BG
maker-2_E_3R-augustus-gene-71.115	0.0624	0.0147	0.235	0.0001	0	0.0018	0.106	0.0008	0.008	0.0697	0.0009	0.0122	0.0001	0	0.0317	BG
maker-1_C_2R-snap-gene-48.113	0.1369	0.1251	0.9137	0.0001	0	0.0165	0.5	0.001	0.002	0.0001	0	0.0335	0.1118	0.0035	0.0317	BG
maker-1_C_2R-augustus-gene-71.19	0.0745	1.7515	23.5064	0.0001	0	0.0103	0.0001	0	0.0099	0.0001	0	0	0.0001	0	0.0221	BG
maker-4_B_2L-augustus-gene-67.104	1.0536	2.6918	2.5548	0.4207	0.0046	0.0108	33.95	0.0679	0.002	0.5435	0.0069	0.0127	0.3156	0.0021	0.0065	BG
maker-3_A_X-augustus-gene-70.93	0.0334	1.7309	51.7467	0.0001	0	0.0142	0.0001	0	0.0136	0.0001	0	0.003	0.0001	0	0.0139	BG
maker-0_D_3L-snap-gene-0.133	0.3249	0.4136	1.2729	0.3052	0.0029	0.0097	0.3261	0.0003	0.0009	0.2992	0.0036	0.0121	0.4	0.0008	0.002	BG
maker-3_A_X-augustus-gene-43.87	0.02	0.006	0.3031	0.1527	0.004	0.0262	0.0001	0	0.013	0.0001	0	0.0159	0.0001	0	0.0031	BG
maker-2_E_3R-augustus-gene-80.72	0.2467	0.057	0.2312	0.1299	0.0009	0.0073	0.0001	0	0.0029	0.0856	0.001	0.0116	0.0486	0.0004	0.0075	BG
maker-5_U_U-augustus-gene-2.17	0.0858	0.0814	0.9483	0.0299	0.0007	0.0226	0.0176	0.0013	0.0729	0.0316	0.0006	0.0185	0.0665	0.002	0.0295	BG
augustus_masked-2_E_3R-processed-gene-76.15	0.1405	0.0394	0.2803	0.0001	0	0.0029	0.0539	0.0022	0.0404	0.1467	0.001	0.0071	0.019	0.0003	0.0175	BG
maker-2_E_3R-augustus-gene-80.7	0.0863	0.0085	0.0985	0.0001	0	0.0042	0.0001	0	0.0118	0.3043	0.0014	0.0046	0.1575	0.0017	0.0106	BG
maker-0_D_3L-augustus-gene-41.138	0.008	0.0033	0.4066	0.0001	0	0.0257	0.0001	0	0.048	0.0001	0	0.0323	0.0139	0.0005	0.0364	BG
maker-1_C_2R-augustus-gene-17.126	0.1009	0.0406	0.4026	0.0598	0.0009	0.0152	0.11	0.0009	0.0078	0.1605	0.0022	0.0134	0.0001	0	0.0049	BG
maker-4_B_2L-augustus-gene-48.10	0.0199	1.1966	60.0138	0.0001	0	0.0128	0.0001	0	0.0033	0.0001	0	0.0079	0.0001	0	0.0067	BG
maker-3_A_X-augustus-gene-78.90	0.0603	1.0154	16.836	0.0001	0	0.0151	0.0001	0	0.009	0.0001	0	0.009	0.0001	0	0.0091	BG
snap_masked-3_A_X-processed-gene-84.	0.0599	0.0355	0.593	0.0256	0.0005	0.0191	0.0776	0.0019	0.025	0.0001	0	0.0219	0.0271	0.001	0.0363	BG
augustus_masked-0_D_3L-processed-gene-18.9	0.0465	0.0242	0.52	0.0001	0	0.0386	0.0001	0	0	0.0001	0	0.0425	0.0001	0	0	BG
maker-1_C_2R-snap-gene-74.128	0.8695	0.0574	0.066	0.4394	0	0	0.0001	0	0.0106	0.467	0	0	0.0001	0	0	BG
augustus_masked-1_C_2R-processed-gene-79.32	0.1562	0.1466	0.9385	0.0759	0.0036	0.0475	0.0927	0.0053	0.0569	0.0566	0.0018	0.0309	0.0789	0.0017	0.0217	BG
maker-1_C_2R-snap-gene-59.125	0.7638	0.2299	0.301	0.8741	0.0053	0.0061	0.0001	0	0	0.5638	0.0039	0.0068	0.0001	0	0	BG
maker-4_B_2L-augustus-gene-35.72	0.3704	0.2957	0.7982	0.076	0.0013	0.0172	0.3856	0.0068	0.0175	0.2729	0.0033	0.0121	0.3278	0.0034	0.0104	BG
maker-1_C_2R-augustus-gene-78.93	0.0716	3.8599	53.903	0.0001	0	0.0088	0.0691	0.0017	0.0243	0.0001	0	0.0148	0.048	0.001	0.02	BG
maker-2_E_3R-augustus-gene-18.95	0.4178	0.1977	0.4731	0.0001	0	0.0042	3.4284	0	0	0.55	0.0011	0.002	0.3601	0.0118	0.0327	BG
maker-4_B_2L-augustus-gene-35.67	0.0619	0.0142	0.2296	0.1022	0	0	0.0001	0	0	0.1947	0	0	0.3403	0.0129	0.038	BG
maker-2_E_3R-snap-gene-63.156	0.2193	0.1373	0.6259	0.0001	0	0.0077	0.0001	0	0	0.265	0.0027	0.01	0.0001	0	0	BG
maker-3_A_X-snap-gene-92.89	0.2211	0.1362	0.6159	0.0001	0	0.0164	1.0623	0	0	0.0001	0	0.007	0.6969	0	0	BG
maker-2_E_3R-augustus-gene-58.133	0.0673	0.0195	0.2891	0.0386	0.0003	0.0083	0.0289	0.0003	0.0102	0.0251	0.0006	0.0231	0.0001	0	0.0126	BG
maker-2_E_3R-augustus-gene-78.113	0.2076	0.0953	0.4591	0.2445	0.0045	0.0184	0.225	0.0051	0.0225	0.3373	0.0066	0.0196	0.1385	0.0029	0.0211	BG
maker-2_E_3R-snap-gene-67.208	0.1285	0.0904	0.7037	0.0822	0.0007	0.0087	0.0955	0.0032	0.0339	0.1671	0.0027	0.0161	0.0502	0.0011	0.0214	BG
maker-3_A_X-snap-gene-28.144	0.0488	0.0225	0.4613	0.0001	0	0.0166	0.0614	0.0008	0.0134	0.0456	0.0008	0.0182	0.0001	0	0.0039	BG
snap_masked-2_E_3R-processed-gene-107.57	0.0409	0.0339	0.8275	0.2466	0.002	0.008	0.0001	0	0.0584	0.0459	0.0013	0.0286	0.012	0.0006	0.054	BG
maker-3_A_X-augustus-gene-94.37	0.1644	1.9296	11.7336	0.0001	0	0.0068	0.0872	0.002	0.0224	0.0625	0.0006	0.0104	0.1586	0.0025	0.0155	BG
maker-0_D_3L-augustus-gene-52.125	0.0937	0.036	0.3846	0.0001	0	0.0126	0.2226	0.0127	0.0571	0.0001	0	0.0261	0.1198	0.0024	0.02	BG
maker-2_E_3R-augustus-gene-1.98	0.011	0.0011	0.1021	0.0001	0	0.004	0.3552	0	0	0.0001	0	0.0185	0.0001	0	0.0045	BG
maker-2_E_3R-augustus-gene-31.64	0.0812	0.0429	0.5279	0.0001	0	0.034	0.0001	0	0	0.0001	0	0.0401	0.0001	0	0	BG
snap_masked-3_A_X-processed-gene-21.3	0.0663	0.0251	0.3788	0.0465	0.0009	0.0198	0.0001	0	0	0.1062	0.0013	0.0123	0.0001	0	0	BG
maker-1_C_2R-augustus-gene-40.132	0.2191	2.2584	10.3089	0.0001	0	0.0099	0.0001	0	0	0.0001	0	0.005	0.0001	0	0.004	BG
augustus_masked-1_C_2R-processed-gene-36.13	0.0995	0.0971	0.9759	0.0001	0	0.0038	0.0001	0	0.0495	0.0001	0	0.0178	0.0994	0.0026	0.0258	BG
maker-0_D_3L-snap-gene-70.133	0.5143	0.749	1.4564	1.15	0.0023	0.002	0.0001	0	0.0207	0.223	0	0	0.0001	0	0	BG
maker-0_D_3L-augustus-gene-34.106	0.1199	0.0074	0.0615	0.0733	0.0015	0.0202	0.0704	0.0017	0.0245	0.0588	0.001	0.0165	0.0639	0.0023	0.0359	BG
maker-0_D_3L-snap-gene-21.135	0.005	0.0011	0.212	0.0001	0	0.0047	0.0001	0	0.0094	0.0224	0.0003	0.0154	0.0001	0	0.0204	BG
maker-3_A_X-augustus-gene-70.88	0.08	0.0472	0.5906	0.0566	0.0008	0.0144	0.0001	0	0.0356	0.0001	0	0.0224	0.0001	0	0.0218	BG
maker-3_A_X-snap-gene-91.55	0.0233	1.2977	55.7852	0.0001	0	0.0062	0.0001	0	0	0.0001	0	0.0195	0.3888	0	0	BG
augustus_masked-1_C_2R-processed-gene-1.6	0.0279	1.5979	57.299	0.0001	0	0.006	0.0001	0	0	0.0001	0	0.0129	0.0001	0	0	BG
maker-2_E_3R-augustus-gene-34.99	0.0277	0.0052	0.1884	0.1929	0	0	0.0001	0	0.0183	0.0001	0	0.0216	0.0001	0	0.0146	BG
maker-5_U_U-snap-gene-18.34	0.1183	0.082	0.693	0.1171	0.0005	0.0041	0.3231	0.0043	0.0133	0.0933	0.001	0.0103	0.2299	0.0028	0.012	BG
maker-4_B_2L-augustus-gene-42.72	0.8106	0.7983	0.9848	0.3913	0	0	0.3274	0.0063	0.0191	0.0001	0	0	0.3358	0.0063	0.0188	BG
maker-0_D_3L-snap-gene-27.18	0.1959	0.0605	0.3091	0.0531	0.0016	0.0294	0.0001	0	0	0.1788	0.0096	0.0539	0.0001	0	0.0346	BG
maker-2_E_3R-snap-gene-75.13	0.0645	0.0255	0.3958	0.049	0.0013	0.0256	0.0001	0	0.0223	0.0154	0.0004	0.0271	0.0216	0.0004	0.0193	BG
maker-2_E_3R-augustus-gene-89.126	0.182	1.1418	6.2752	0.1712	0.0022	0.0126	0.0001	0	0.0094	0.2264	0.0026	0.0115	0.0001	0	0.0155	BG
maker-1_C_2R-augustus-gene-60.143	0.2745	0.1254	0.4568	0.0001	0	0.0177	0.9342	0	0	0.0001	0	0.0347	0.5502	0	0	BG
augustus_masked-0_D_3L-processed-gene-24.28	0.0547	0.6072	11.107	1.4	0.0028	0.002	0.0229	0.0011	0.0477	0.5164	0.0043	0.0083	0.0213	0.001	0.0448	BG
maker-1_C_2R-augustus-gene-58.114	0.2789	0.447	1.6028	0.2714	0.0051	0.0189	0.0001	0	0	0.3349	0.0063	0.0187	0.0001	0	0	BG
maker-0_D_3L-augustus-gene-51.139	0.0372	0.0182	0.491	0.0001	0	0.0063	0.0001	0	0	0.0001	0	0	0.0001	0	0	BG
augustus_masked-3_A_X-processed-gene-50.7	0.1935	0.2039	1.0536	0.4262	0	0	0.0747	0.0063	0.0845	0.2741	0.0029	0.0105	0.0676	0.0058	0.0858	BG
maker-1_C_2R-augustus-gene-20.169	0.1234	0.0377	0.3059	0.0001	0	0.0096	0.1599	0.0009	0.0059	0.1235	0.0013	0.0101	0.0259	0.0005	0.0184	BG
maker-1_C_2R-augustus-gene-35.6	0.269	0.1692	0.6292	0.3373	0	0	0.6517	0.0091	0.014	0.0001	0	0.0142	0.2857	0	0	BG
maker-0_D_3L-augustus-gene-27.134	0.2885	0.1625	0.5632	0.2548	0.0062	0.0244	0.1414	0.0049	0.0348	0.0001	0	0.0045	0.1966	0.0022	0.0114	BG
snap_masked-1_C_2R-processed-gene-34.74	0.0965	0.031	0.3213	0.0001	0	0.0279	0.1638	0.0037	0.0226	0.0001	0	0.0106	0.1464	0	0	BG
maker-2_E_3R-augustus-gene-99.100	0.0966	0.0886	0.9172	0.0001	0	0.0102	0.0001	0	0.0029	0.0001	0	0.025	0.0001	0	0.0135	BG
augustus_masked-0_D_3L-processed-gene-75.7	0.0572	0.0373	0.652	0.0001	0	0.0119	0.0001	0	0.0237	0.0001	0	0.0059	0.0001	0	0	BG
maker-4_B_2L-augustus-gene-39.88	0.0359	0.0075	0.2087	0.0001	0	0.0155	0.0001	0	0.0022	0.0001	0	0.0088	0.0001	0	0.0049	BG
augustus_masked-0_D_3L-processed-gene-14.	0.0725	0.0442	0.609	0.0289	0.0012	0.0427	0.129	0.0035	0.0268	0.0001	0	0.0246	0.0001	0	0.0185	BG
maker-0_D_3L-augustus-gene-71.	0.204	2.0559	10.0791	0.5404	0.0038	0.007	0.0929	0.0025	0.0265	1.0843	0.0076	0.007	0.1464	0.0025	0.0169	BG
maker-0_D_3L-snap-gene-35.166	0.1722	0.0744	0.4318	0.0001	0	0.0278	0.6102	0	0	0.0622	0.0026	0.0412	0.3889	0	0	BG
maker-2_E_3R-augustus-gene-106.45	0.0544	3.2036	58.8808	0.1576	0	0	0.0001	0	0.0217	0.0001	0	0.0118	0.0378	0.001	0.0255	BG
augustus_masked-4_B_2L-processed-gene-59.15	0.2259	0.1181	0.5227	0.0735	0.001	0.0141	0.0001	0	0	0.0472	0.0009	0.0182	0.0001	0	0	BG
maker-1_C_2R-augustus-gene-72.95	0.2445	0.0383	0.1566	0.7374	0.0131	0.0177	0.1151	0	0	0.3268	0	0	0.0001	0	0.0175	BG
snap_masked-4_B_2L-processed-gene-21.	0.1234	0.0992	0.8037	0.2585	0.0054	0.0208	0.2628	0.004	0.0154	0.0492	0.0013	0.0271	0.2111	0.0047	0.022	BG
maker-2_E_3R-augustus-gene-11.72	0.0953	0.0476	0.5001	0.0538	0.0021	0.0397	0.0399	0.0022	0.054	0.0001	0	0.0178	0.0317	0.0021	0.067	BG
maker-3_A_X-augustus-gene-28.87	0.053	2.466	46.5504	0.0001	0	0.011	0.0001	0	0	0.0001	0	0.0163	0.0001	0	0.0132	BG
maker-1_C_2R-augustus-gene-62.106	0.0147	1.0013	68.1437	0.0001	0	0.0229	0.0001	0	0.0227	0.0001	0	0.023	0.1395	0.002	0.0146	BG
maker-4_B_2L-augustus-gene-62.	0.0439	1.0915	24.8751	0.0679	0.001	0.0141	0.1082	0.0007	0.0068	0.0001	0	0.037	0.0326	0.0007	0.0227	BG
augustus_masked-1_C_2R-processed-gene-37.15	0.0766	0.0216	0.2822	0.0001	0	0.0229	0.0001	0	0	0.0001	0	0.0051	0.0001	0	0	BG
maker-1_C_2R-augustus-gene-71.187	0.1499	0.0073	0.0488	0.3658	0.0008	0.0023	0.0591	0.0007	0.0123	0.0001	0	0.0057	0.0001	0	0.0109	BG
maker-1_C_2R-augustus-gene-83.86	0.0825	0.0679	0.8229	0.1898	0.0025	0.013	0.0001	0	0.0028	0.0473	0.001	0.0221	0.0001	0	0	BG
maker-1_C_2R-augustus-gene-46.112	0.0192	0.0001	0.0035	0.3408	0	0	0.1401	0	0	0.4348	0	0	0.0001	0	0.0195	BG
augustus_masked-3_A_X-processed-gene-87.	0.2389	2.7067	11.3305	0.1473	0.0035	0.0236	0.1812	0.0072	0.0396	0.1444	0.0037	0.0258	0.2863	0.0076	0.0265	BG
maker-1_C_2R-augustus-gene-24.106	0.0627	0.0219	0.3488	0.0818	0.002	0.0243	0.0369	0.001	0.026	0.2338	0.001	0.0042	0.0001	0	0.0358	BG
maker-2_E_3R-augustus-gene-48.96	0.041	0.0157	0.3842	0.0001	0	0.0273	0.0001	0	0.0261	0.0001	0	0.0067	0.1481	0.0028	0.0188	BG
maker-0_D_3L-augustus-gene-30.106	0.0935	0.0586	0.6265	0.0001	0	0.0046	0.0001	0	0.029	0.1815	0.0019	0.0102	0.1555	0.0018	0.0119	BG
maker-1_C_2R-augustus-gene-84.128	0.0159	0.9637	60.6219	0.0381	0.001	0.0274	0.0239	0.001	0.0434	0.0001	0	0.0233	0.0001	0	0.0355	BG
maker-3_A_X-snap-gene-41.105	0.0802	0.0289	0.3607	0.0466	0.0004	0.0094	0.0805	0.0022	0.027	0.0569	0.0009	0.0153	0.0336	0.0009	0.0261	BG
maker-4_B_2L-augustus-gene-42.74	0.0203	1.2607	62.229	0.0001	0	0.0095	0.0001	0	0.0092	0.0001	0	0.0093	0.0001	0	0	BG
snap_masked-4_B_2L-processed-gene-92.25	0.1013	0.0487	0.481	0.0856	0.0022	0.0254	0.0001	0	0.035	0.1718	0.0068	0.0397	0.1317	0.0059	0.0449	BG
snap_masked-4_B_2L-processed-gene-23.83	0.0142	0.8232	58.1313	0.0001	0	0.0233	0.1134	0.0021	0.0182	0.0001	0	0.017	0.0001	0	0.0102	BG
maker-2_E_3R-augustus-gene-17.10	0.235	0.1565	0.6659	0.1946	0.0025	0.013	0.1103	0.002	0.018	0.0672	0.0013	0.02	0.1292	0.0026	0.0201	BG
maker-4_B_2L-snap-gene-53.175	0.1607	0.1172	0.7294	0.0698	0.0013	0.0179	0.0001	0	0.0162	0.0496	0.0011	0.0226	0.0001	0	0.0125	BG
maker-4_B_2L-augustus-gene-20.100	0.5643	0.9176	1.626	0.0001	0	0.0036	0.0001	0	0.0147	0.0001	0	0.0042	0.0001	0	0.0147	BG
maker-1_C_2R-augustus-gene-45.93	0.1464	1.7976	12.2775	0.2842	0	0	0.134	0.0021	0.0158	0.0001	0	0.008	0.0001	0	0.0229	BG
maker-1_C_2R-augustus-gene-79.102	0.2894	0.2754	0.9518	0.0001	0	0.0048	0.1721	0.0031	0.0179	0.3013	0.0114	0.0379	0.0001	0	0.0074	BG
maker-1_C_2R-augustus-gene-66.105	0.1881	0.0859	0.4569	0.1857	0.0025	0.0132	0.4863	0.0081	0.0166	0.2838	0.0052	0.0182	0.2295	0.0015	0.0065	BG
maker-0_D_3L-augustus-gene-88.93	0.0813	2.5312	31.1164	0.0448	0.0021	0.0464	0.072	0.0031	0.0432	0.0001	0	0.0248	0.0472	0.0021	0.0442	BG
maker-2_E_3R-augustus-gene-14.92	0.0347	0.0185	0.5318	0.0001	0	0.0098	0.0001	0	0.0206	0.0303	0.0006	0.0188	0.0001	0	0.0142	BG
maker-1_C_2R-augustus-gene-9.16	0.1337	2.3447	17.5313	0.0001	0	0.02	0.1217	0.0032	0.0261	0.0001	0	0.0217	0.0001	0	0.0163	BG
maker-1_C_2R-augustus-gene-20.127	0.0133	0.7547	56.8374	0.0001	0	0.0059	0.0001	0	0.009	0.0511	0.0006	0.0112	0.0001	0	0.0069	BG
maker-2_E_3R-augustus-gene-32.102	0.0192	0.0001	0.0044	0.2989	0.005	0.0168	2.55	0.0051	0.002	0.3193	0	0	0.2237	0	0	BG
augustus_masked-2_E_3R-processed-gene-72.10	0.0685	0.0432	0.6301	0.0001	0	0.0167	0.0001	0	0.0159	0.0992	0.0015	0.0154	0.0001	0	0.0385	BG
maker-4_B_2L-augustus-gene-52.122	0.0968	0.0399	0.4121	0.2095	0.0034	0.0163	0.0001	0	0.0156	0.1265	0.0014	0.0108	0.063	0.0007	0.0108	BG
maker-2_E_3R-augustus-gene-34.119	0.0215	1.4334	66.5961	0.0001	0	0.0102	0.0001	0	0.0151	0.0001	0	0.0206	0.0001	0	0.0322	BG
maker-0_D_3L-snap-gene-60.127	0.0889	0.0079	0.089	0.0001	0	0.0046	0.0784	0.001	0.0133	0.85	0.0017	0.002	0.1066	0.0042	0.0393	BG
maker-3_A_X-snap-gene-77.109	0.1211	0.0526	0.4344	0.0631	0.001	0.0157	0.0001	0	0.0061	0.1158	0.0025	0.0214	0.0443	0.0003	0.0076	BG
maker-2_E_3R-augustus-gene-55.149	0.1485	0.021	0.1413	0.0755	0.001	0.0134	0.0001	0	0.0219	0.0001	0	0.0073	0.0001	0	0.0198	BG
maker-3_A_X-augustus-gene-24.4	0.0432	2.4638	57.0005	0.0001	0	0.0151	0.55	0.0011	0.002	0.0304	0.0005	0.0172	0.0001	0	0	BG
maker-1_C_2R-augustus-gene-33.118	0.4901	0.0747	0.1525	0.3004	0.0114	0.0378	0.3004	0.0114	0.0378	1.3068	0.0571	0.0437	0.3524	0.0156	0.0443	BG
maker-4_B_2L-augustus-gene-62.108	0.0293	1.9423	66.2514	0.153	0.0026	0.0171	0.0001	0	0.0172	0.0001	0	0	0.0001	0	0.0437	BG
maker-1_C_2R-augustus-gene-77.103	0.7313	0.9463	1.294	0.4316	0	0	0.0001	0	0	0.0001	0	0	0.0001	0	0	BG
maker-2_E_3R-augustus-gene-39.106	0.0559	0.0287	0.5127	0.0763	0.0018	0.0235	0.0862	0.0018	0.0204	0.2371	0.0018	0.0075	0.2116	0.0018	0.0083	BG
maker-0_D_3L-augustus-gene-31.106	0.8795	0.0164	0.0186	0.6167	0.0047	0.0076	0.4803	0.0145	0.0302	0.0001	0	0.0102	0.4803	0.0145	0.0302	BG
maker-3_A_X-augustus-gene-46.105	0.0173	0.0063	0.3612	0.2676	0	0	0.0001	0	0.0046	0.3091	0.0013	0.0041	0.0001	0	0.0064	BG
maker-4_B_2L-augustus-gene-76.68	0.1014	0.0926	0.9127	0.0001	0	0.0307	0.0304	0.0008	0.0253	0.0001	0	0.0207	0.0001	0	0.0278	BG
augustus_masked-0_D_3L-processed-gene-83.22	0.0548	0.0391	0.7127	0.0001	0	0.0158	0.2755	0.0034	0.0125	0.0001	0	0.0104	0.0001	0	0.0139	BG
augustus_masked-2_E_3R-processed-gene-29.20	0.1136	0.0608	0.5358	0.0001	0	0.0343	0.0001	0	0.0224	0.0001	0	0	0.6	0.0012	0.002	BG
maker-4_B_2L-augustus-gene-24.99	0.0236	1.426	60.3232	0.0001	0	0.021	0.0001	0	0.0208	0.0998	0.0021	0.0212	0.305	0.0021	0.0069	BG
maker-3_A_X-snap-gene-47.90	0.1143	4.3985	38.4982	0.7608	0.001	0.0013	0.0001	0	0.0138	0.2559	0.005	0.0195	0.0212	0.0006	0.0293	BG
augustus_masked-1_C_2R-processed-gene-36.5	2.1511	1.1577	0.5382	0.4162	0	0	0.6294	0.0116	0.0185	0.0001	0	0.0076	0.0741	0.0024	0.0321	BG
snap_masked-1_C_2R-processed-gene-51.6	0.4592	0.2295	0.4998	0.4501	0	0	0.4638	0.0214	0.0462	16.65	0.0333	0.002	0.6972	0.0118	0.017	BG
maker-1_C_2R-snap-gene-42.129	0.105	0.4394	4.1856	0.1157	0.0021	0.0184	0.0708	0.0019	0.027	0.0762	0.0018	0.0238	0.041	0.0011	0.0258	BG
maker-1_C_2R-augustus-gene-43.165	0.267	0.568	2.1271	0.0001	0	0.0122	0.1304	0.0034	0.0262	0.1271	0.0024	0.0188	0.5356	0.0033	0.0062	BG
snap_masked-3_A_X-processed-gene-37.18	0.1448	0.0949	0.6553	0.0781	0.0016	0.021	0.1102	0.0054	0.0493	0.1757	0.0033	0.0185	0.1035	0.006	0.0582	BG
maker-2_E_3R-augustus-gene-10.9	0.0557	1.4112	25.332	0.0001	0	0.0119	0.0496	0.003	0.0614	0.1035	0.0018	0.0176	0.1345	0.006	0.0449	BG
maker-2_E_3R-augustus-gene-98.79	0.0485	1.8942	39.0642	0.0001	0	0.0069	0.0001	0	0.0073	0.0001	0	0.0086	0.0001	0	0.0205	BG
maker-2_E_3R-augustus-gene-94.8	0.0069	0.0027	0.3907	0.3796	0	0	0.0001	0	0	0.3001	0	0	0.0001	0	0.0329	BG
snap_masked-1_C_2R-processed-gene-78.34	0.1962	0.053	0.2702	0.0001	0	0.0298	0.1593	0.0058	0.0363	0.0512	0.0023	0.0445	0.0001	0	0.0013	BG
augustus_masked-1_C_2R-processed-gene-50.26	0.0182	0.0061	0.3322	0.0001	0	0.0111	0.1454	0	0	0.0716	0.0014	0.0198	0.1385	0	0	BG
maker-3_A_X-augustus-gene-50.72	0.1912	0.1505	0.7869	0.0001	0	0.0042	0.4561	0.0176	0.0385	0.0631	0.0013	0.0202	0.0001	0	0.0067	BG
maker-3_A_X-augustus-gene-28.95	0.1735	1.5147	8.731	0.1066	0.0016	0.0155	0.0362	0.0004	0.0123	0.0835	0.0028	0.0341	0.0338	0.0004	0.0132	BG
maker-0_D_3L-augustus-gene-29.76	0.3341	0.3025	0.9055	0.0001	0	0.0085	1.3105	0	0	0.0726	0.0022	0.0306	0.0001	0	0.0257	BG
maker-3_A_X-augustus-gene-26.96	0.1778	0.0146	0.0819	0.0001	0	0.0128	1.8	0.0036	0.002	0.0001	0	0	NA	NA	NA	BG
maker-3_A_X-augustus-gene-43.83	0.1664	0.0187	0.1125	0.0522	0.0006	0.0118	0.0343	0.0024	0.0703	0.5526	0.0009	0.0016	0.0282	0.0018	0.063	BG
maker-4_B_2L-augustus-gene-1.52	0.1202	0.0689	0.5728	0.0001	0	0.0053	0.0001	0	0.0081	0.1659	0.0006	0.0038	0.0888	0.0013	0.0143	BG
maker-4_B_2L-augustus-gene-10.87	0.1027	5.1507	50.1502	0.3314	0.0012	0.0035	0.0001	0	0.0082	0.0605	0.0012	0.0193	0.0001	0	0.0087	BG
maker-4_B_2L-augustus-gene-75.66	0.0602	0.0064	0.1056	0.0001	0	0.0066	0.0001	0	0.0911	0.0001	0	0.0039	NA	NA	NA	BG
maker-1_C_2R-snap-gene-13.137	0.1407	0.139	0.9882	0.0001	0	0.0195	0.0463	0.0052	0.1116	0.0883	0.0016	0.0183	0.0523	0.005	0.0955	BG
maker-4_B_2L-augustus-gene-21.12	0.2226	8.2894	37.2306	0.2859	0	0	0.4628	0	0	0.4501	0	0	0.3657	0.0043	0.0119	BG
maker-3_A_X-augustus-gene-17.26	0.1351	0.0094	0.0697	0.0001	0	0.0125	0.6	0.0012	0.002	0.2395	0.001	0.0043	0.0001	0	0	BG
maker-2_E_3R-augustus-gene-86.127	0.0848	4.6014	54.2586	0.1172	0	0	0.0676	0.0014	0.0204	0.0001	0	0.0086	0.0001	0	0.0198	BG
maker-0_D_3L-augustus-gene-27.127	0.027	0.0121	0.4496	0.0432	0.0004	0.0094	0.008	0.0004	0.0508	0.0001	0	0.0156	0.0001	0	0.039	BG
maker-3_A_X-augustus-gene-60.73	0.0362	0.0118	0.3247	0.0001	0	0.0068	0.0001	0	0.0067	0.4104	0	0	0.0001	0	0.014	BG
maker-0_D_3L-augustus-gene-57.7	0.1271	0.0814	0.6403	0.0849	0.002	0.0232	0.0395	0.0006	0.0162	0.0001	0	0.009	0.1104	0.0006	0.0058	BG
maker-1_C_2R-augustus-gene-29.84	0.105	4.5498	43.3512	0.7	0.0014	0.002	0.0001	0	0.0239	0.1946	0.0031	0.0161	0.1639	0.0035	0.0216	BG
maker-1_C_2R-snap-gene-83.125	0.3039	1.216	4.0017	0.254	0.0037	0.0145	0.0001	0	0	0.0369	0.0005	0.0126	0.0001	0	0	BG
maker-1_C_2R-augustus-gene-32.64	0.4655	0.2525	0.5424	14.6363	0.0082	0.0006	0.7806	0.0203	0.026	0.4862	0.0449	0.0924	0.1375	0.0127	0.0925	BG
maker-2_E_3R-snap-gene-29.127	0.229	0.1313	0.5734	0.0703	0.0018	0.0249	0.3139	0.0038	0.012	0.0468	0.0018	0.0374	0.1093	0.0086	0.0785	BG
maker-2_E_3R-augustus-gene-58.132	0.3798	0.223	0.5871	1.0241	0.0048	0.0047	0.607	0.0032	0.0054	0.1257	0.0021	0.0165	0.1707	0.0017	0.0099	BG
snap_masked-1_C_2R-processed-gene-15.28	0.0948	0.0201	0.212	0.4542	0.0048	0.0106	0.0001	0	0.0048	0.0001	0	0.0327	0.0001	0	0	BG
maker-0_D_3L-augustus-gene-59.103	0.0347	0.0145	0.4192	0.0805	0.0006	0.0071	0.0406	0.0015	0.0381	0.0639	0.0012	0.0187	0.0345	0.0006	0.0166	BG
snap_masked-1_C_2R-processed-gene-14.25	0.1432	1.2753	8.904	0.0001	0	0.0089	0.2333	0.0061	0.026	0.0001	0	0.0172	0.0383	0.002	0.0522	BG
maker-2_E_3R-augustus-gene-59.145	0.0513	1.5246	29.7269	0.0001	0	0.0107	0.1672	0.0007	0.0041	0.0001	0	0.0204	0.0001	0	0.0087	BG
maker-2_E_3R-augustus-gene-77.79	0.2254	0.1114	0.494	0.1864	0.0038	0.0202	0.0001	0	0.0415	0.2005	0.006	0.0298	0.0001	0	0.0365	BG
maker-2_E_3R-augustus-gene-40.94	0.1934	0.1273	0.6579	0.2222	0.0024	0.0108	0.2824	0.0031	0.0111	0.7705	0.0036	0.0046	0.4261	0.0041	0.0097	BG
maker-4_B_2L-augustus-gene-33.97	0.0739	0.0285	0.3863	0.2304	0.0051	0.022	0.0252	0.0007	0.0281	0.1567	0.0022	0.014	0.0356	0.0007	0.0199	BG
maker-0_D_3L-snap-gene-5.114	0.1227	0.1082	0.8817	0.0713	0.0008	0.0111	0.6029	0.0016	0.0027	0.255	0.0047	0.0186	0.2582	0.0009	0.0034	BG
snap_masked-99_U_U-processed-gene-0.	0.1511	0.1116	0.7382	0.1402	0.0045	0.032	0.0001	0	0	0.1826	0.0078	0.0425	0.0001	0	0	BG
maker-2_E_3R-augustus-gene-81.123	0.0019	0.0004	0.1962	0.0001	0	0.0242	0.0001	0	0.0254	0.0001	0	0.0124	0.0001	0	0.0156	BG
maker-0_D_3L-augustus-gene-15.182	0.1522	0.0569	0.3739	0.4257	0.0023	0.0055	1.3	0.0026	0.002	0.0001	0	0.0049	0.0001	0	0.0026	BG
maker-2_E_3R-augustus-gene-58.127	0.483	0.981	2.031	0.3451	0	0	0.2596	0.0019	0.0071	0.0001	0	0.0071	0.0001	0	0.0071	BG
maker-0_D_3L-augustus-gene-72.97	0.1344	1.2769	9.4976	40.1035	0	0	0.0001	0	0.0037	0	0	0.002	5.0986	0	0	BG
maker-1_C_2R-augustus-gene-84.138	0.026	0.0034	0.1307	0.0001	0	0.0258	0.0001	0	0.0984	0.0001	0	0	NA	NA	NA	BG
snap_masked-1_C_2R-processed-gene-13.52	4.2525	2.8898	0.6796	1.0928	0.0196	0.018	0.0001	0	0	1.2974	0.0181	0.0139	0.0001	0	0	BG
maker-1_C_2R-augustus-gene-53.44	0.1043	0.0775	0.7428	0.0001	0	0.0188	0.0203	0.0009	0.043	0.0001	0	0.0078	0.039	0.0009	0.0223	BG
maker-1_C_2R-augustus-gene-21.69	0.1526	1.5122	9.9081	0.0001	0	0	0.0576	0.0049	0.0845	0.2548	0.0049	0.0193	0.0001	0	0.0468	BG
maker-4_B_2L-augustus-gene-38.117	0	0	0.0191	0.414	0	0	0.0088	0	0	0.2475	0	0	0.0583	0	0	BG
snap_masked-2_E_3R-processed-gene-88.46	0.2168	0.095	0.438	1.75	0.0035	0.002	0.1856	0.0021	0.0112	0.0087	0.0002	0.023	0.3097	0.0047	0.0151	BG
maker-3_A_X-augustus-gene-33.152	0.0858	0.0334	0.3891	0.0001	0	0.0021	0.0001	0	0.0075	0.1308	0.0018	0.0135	0.1634	0.0018	0.0107	BG
maker-0_D_3L-augustus-gene-51.153	0.1164	0.0289	0.2481	0.0001	0	0.0068	0.0001	0	0	0.1867	0.0006	0.0031	0.0001	0	0	BG
augustus_masked-1_C_2R-processed-gene-2.10	0.081	0.039	0.4816	0.2399	0.0012	0.0048	0.0001	0	0	0.0001	0	0.0081	0.0001	0	0	BG
maker-4_B_2L-augustus-gene-83.107	0.178	0.008	0.0451	0.5684	0.0038	0.0067	0.0463	0.0023	0.049	0.3134	0.0033	0.0106	NA	NA	NA	BG
maker-0_D_3L-augustus-gene-28.80	0.7617	0.9368	1.2299	0.4775	0	0	0.0001	0	0.0099	0.0001	0	0.0193	0.0001	0	0.0104	BG
maker-1_C_2R-augustus-gene-39.162	0.0761	0	0	0.1075	0.0021	0.0199	0.038	0.001	0.0264	0.0495	0.002	0.0405	0.0585	0.002	0.0343	BG
maker-1_C_2R-snap-gene-63.84	0.1716	0.0985	0.5741	0.3311	0.002	0.0059	0.1096	0.0038	0.0349	0.6596	0.0043	0.0065	0.0551	0.0024	0.0439	BG
augustus_masked-1_C_2R-processed-gene-39.13	0.0822	4.3384	52.7619	0.0606	0.0005	0.009	0.0001	0	0	0.0807	0.0011	0.0136	0.25	0.0005	0.002	BG
maker-1_C_2R-augustus-gene-49.62	0.0323	1.8971	58.8026	0.0001	0	0.0135	0.0001	0	0.0356	0.0508	0.0006	0.0116	0.0001	0	0.0257	BG
maker-1_C_2R-augustus-gene-24.137	0.0662	1.2913	19.4993	0.0001	0	0.02	0.174	0.0011	0.0065	0.0856	0.0011	0.0131	0.0001	0	0	BG
maker-0_D_3L-augustus-gene-89.35	0.0287	0.0109	0.3793	0.0001	0	0.0337	0.0001	0	0.009	0.0001	0	0	0.0001	0	0.025	BG
maker-3_A_X-augustus-gene-98.48	0.2294	1.8474	8.0517	0.0001	0	0.0044	0.0957	0.0057	0.0592	0.3183	0	0	0.1701	0.0036	0.0214	BG
maker-3_A_X-augustus-gene-11.64	0.063	0.029	0.4599	0.0001	0	0.006	0.0001	0	0.004	0.0001	0	0.0028	0.0001	0	0.0042	BG
maker-3_A_X-augustus-gene-24.38	0.0603	2.9082	48.2375	0.0489	0.0013	0.0275	0.0001	0	0	0.0001	0	0.0127	0.0001	0	0	BG
maker-0_D_3L-snap-gene-69.99	0.1826	0.0559	0.3059	0.0316	0.0005	0.0167	0.0328	0.0005	0.0167	0.0704	0.0016	0.0231	0.0846	0.0005	0.0063	BG
maker-2_E_3R-augustus-gene-64.105	0.0924	0.0366	0.3955	0.0001	0	0.0037	0.0232	0.0007	0.0323	0.0947	0.0014	0.0151	0.2705	0.0033	0.0122	BG
maker-4_B_2L-augustus-gene-38.102	0.0904	0.0349	0.386	0.0001	0	0.0152	0	0	0.002	1.0919	0	0	0.0001	0	0.0153	BG
maker-3_A_X-augustus-gene-28.86	0	0	0.3609	NA	NA	NA	NA	NA	NA	NA	NA	NA	NA	NA	NA	BG
maker-1_C_2R-augustus-gene-77.112	0.0639	0.0135	0.2112	0.05	0.0012	0.0233	0.082	0.0021	0.0253	0.0869	0.0012	0.0143	0.0454	0.0007	0.0163	BG
maker-1_C_2R-augustus-gene-9.138	0.0519	0.0143	0.275	0.0001	0	0.0083	0.0001	0	0.0368	0.0001	0	0	0.0001	0	0.0242	BG
maker-3_A_X-augustus-gene-78.86	0.4822	0.9801	2.0324	0.11	0.0006	0.0055	0.1987	0.0012	0.0062	0.1215	0.0026	0.0217	0.0001	0	0.0147	BG
maker-1_C_2R-augustus-gene-39.178	0.0031	0.0015	0.4802	0.3846	0	0	0.0001	0	0.0308	0.0001	0	0.0206	0.0001	0	0.0228	BG
maker-1_C_2R-augustus-gene-14.	0.0236	0.0058	0.2471	0.0001	0	0.005	0.0001	0	0	0.0001	0	0.0226	0.0001	0	0	BG
maker-1_C_2R-snap-gene-17.142	0.3128	0.139	0.4445	0.467	0	0	1.35	0.0027	0.002	0.3156	0.0017	0.0052	0.0001	0	0.008	BG
maker-0_D_3L-augustus-gene-26.115	0.6898	0.3844	0.5573	0.0245	0.0005	0.0186	0.1025	0.0029	0.0283	0.1028	0.0009	0.0088	0.0001	0	0.0251	BG
maker-1_C_2R-snap-gene-39.197	0.1739	0.0542	0.3118	0.0001	0	0.0106	0.0001	0	0.0057	0.0001	0	0.0153	0.6	0.0012	0.002	BG
maker-4_B_2L-augustus-gene-74.99	0.0312	1.965	62.8892	0.0001	0	0.0134	0.0001	0	0.0038	0.0001	0	0.0092	0.0001	0	0.0191	BG
maker-1_C_2R-augustus-gene-23.10	0.0036	0.001	0.2735	0.0001	0	0.0287	0.0001	0	0.0125	0.0001	0	0.0238	0.0001	0	0	BG
maker-1_C_2R-snap-gene-8.159	0.2635	0.0507	0.1924	0.0001	0	0	0.0001	0	0	0.15	0.0052	0.035	0.1536	0.0031	0.0203	BG
maker-2_E_3R-augustus-gene-82.132	0.0998	0.0151	0.1513	0.1766	0.004	0.0226	0.1052	0.004	0.038	0.1162	0.0029	0.0248	0.0468	0.0023	0.0498	BG
augustus_masked-4_B_2L-processed-gene-64.14	0.0395	0.0112	0.2825	0.0193	0.0003	0.0163	0.0674	0.0012	0.0175	0.0124	0.0003	0.0262	0.0034	0	0.0111	BG
maker-3_A_X-augustus-gene-7.70	0.0454	0.0139	0.3055	0.0001	0	0.0057	0.0001	0	0.0116	0.0001	0	0	0.0001	0	0.0057	BG
maker-0_D_3L-snap-gene-11.137	0.0503	0.0262	0.5212	0.0177	0.0005	0.0263	0.0203	0.002	0.0965	0.0001	0	0.0308	0.0159	0.6339	39.9082	BG
maker-1_C_2R-augustus-gene-41.110	0.0811	2.051	25.2996	0.0001	0	0.03	0.3464	0.0018	0.0052	0.0584	0.0017	0.0298	0.1111	0.0018	0.0164	BG
maker-1_C_2R-augustus-gene-45.96	0.2281	0.1305	0.5724	0.0001	0	0.01	0.0001	0	0.0151	2.15	0.0043	0.002	0.0001	0	0.0172	BG
augustus_masked-4_B_2L-processed-gene-38.4	0.1122	0.0713	0.6355	0.5004	0.0043	0.0086	0.6	0.0012	0.002	0.2354	0.0027	0.0115	0.0001	0	0	BG
maker-1_C_2R-snap-gene-2.112	0.0446	0.025	0.5611	0.0001	0	0.0139	0.0001	0	0	0.0001	0	0	0.0001	0	0	BG
maker-0_D_3L-augustus-gene-26.100	0.0454	0.0249	0.548	0.0001	0	0.0191	0.0001	0	0.0037	0.0001	0	0.0039	0.0001	0	0.0078	BG
maker-2_E_3R-augustus-gene-59.167	0.143	6.103	42.6664	0.0001	0	0.0109	0.0001	0	0	0.0001	0	0.0106	0.1823	0	0	BG
maker-3_A_X-snap-gene-68.70	0.2483	0.1164	0.4688	0.2349	0.0019	0.0082	0.3531	0.0054	0.0152	0.1089	0.001	0.009	0.0694	0.0017	0.025	BG
maker-1_C_2R-augustus-gene-43.14	0.1898	0.1882	0.9914	0.069	0.0019	0.0279	0.2326	0.0057	0.0246	0.0001	0	0.0258	0.1337	0.0023	0.017	BG
maker-4_B_2L-augustus-gene-52.106	0.2159	0.0822	0.3808	0.0001	0	0.0195	0.0001	0	0.0631	0.1096	0.0014	0.0126	0.2982	0.0095	0.0319	BG
maker-1_C_2R-augustus-gene-5.103	0.0166	0.9153	55.1133	0.0001	0	0.0119	0.0601	0.001	0.0168	0.0001	0	0.0075	0.1385	0.001	0.0073	BG
maker-3_A_X-snap-gene-99.47	0.1867	0.0133	0.0715	0.0001	0	0	0.0001	0	0	6.9387	0.0056	0.0008	0.172	0.0006	0.0035	BG
maker-0_D_3L-augustus-gene-42.109	0.0999	0.0443	0.4431	0.2651	0.0023	0.0089	0.0389	0.0008	0.0213	0.0001	0	0.0147	0.0477	0.0023	0.0491	BG
maker-1_C_2R-augustus-gene-73.110	0.0758	0.6599	8.7018	0.3444	0	0	0.0001	0	0.0142	0.0001	0	0.0162	2.55	0.0051	0.002	BG
maker-1_C_2R-snap-gene-82.139	0.2738	0.0376	0.1372	0.0001	0	0.006	0.0001	0	0.0131	0.1334	0.0017	0.0124	0.3733	0	0	BG
maker-0_D_3L-augustus-gene-36.148	0.0476	0.012	0.2516	0.0001	0	0.0106	0.06	0.001	0.0174	0.0001	0	0.0203	0.0116	0.0002	0.0182	BG
maker-1_C_2R-augustus-gene-82.87	0.1363	0	0	0.0001	0	0.0067	0.0706	0.0067	0.0955	0.0001	0	0	0.0706	0.0067	0.0955	BG
maker-2_E_3R-snap-gene-104.116	0.0426	0.0264	0.6204	0.0447	0.0005	0.012	0.0288	0.0005	0.0185	0.0676	0.0005	0.0079	0.0216	0.0005	0.0246	BG
maker-1_C_2R-augustus-gene-8.144	0.1568	0.0164	0.1047	0.0001	0	0.032	0.0001	0	0.0651	0.0001	0	0	0.0419	0.0053	0.1273	BG
maker-1_C_2R-snap-gene-28.145	0.0796	0.0332	0.4174	0.0001	0	0.0045	0.0001	0	0.0274	0.0376	0.0009	0.0239	0.0248	0.0009	0.0366	BG
maker-2_E_3R-snap-gene-5.144	0.1669	0.0815	0.4882	0.2308	0.0004	0.0019	0.108	0.0009	0.0085	0.762	0.0013	0.0017	0.2083	0.0005	0.0023	BG
maker-4_B_2L-augustus-gene-37.67	0.0134	0.0002	0.0141	0.0001	0	0.0049	0.0001	0	0	0.0001	0	0.0145	0.0001	0	0	BG
maker-1_C_2R-augustus-gene-62.109	0.1418	0.0842	0.5939	0.1229	0.0019	0.0154	0.1214	0.0031	0.0253	0.2285	0.0036	0.0157	0.0938	0.0023	0.0249	BG
maker-1_C_2R-augustus-gene-67.	0.2132	0.93	4.3613	0.0001	0	0.0024	0.6563	0.0018	0.0027	0.0915	0.0009	0.0095	0.3481	0.0009	0.0026	BG
maker-4_B_2L-augustus-gene-82.93	0.0646	0.0036	0.0564	0.0001	0	0	0.0001	0	0	0.0001	0	0	0.0001	0	0.0149	BG
maker-3_A_X-augustus-gene-33.120	0.0354	0.0151	0.4275	0.0134	0.0004	0.03	0.024	0.0008	0.0323	0.0588	0.0008	0.0133	0.0112	0.0004	0.0346	BG
maker-1_C_2R-augustus-gene-42.120	0.7945	1.2043	1.5158	0.0884	0.0042	0.0474	6.35	0.0127	0.002	0.3503	0.0082	0.0234	1.25	0.0025	0.002	BG
maker-3_A_X-augustus-gene-74.88	0.1781	0.7944	4.4604	0.0001	0	0.0362	0.0001	0	0	0.0001	0	0	0.0001	0	0	BG
maker-4_B_2L-augustus-gene-78.94	0.7713	1.7626	2.2853	0.4636	0.026	0.0562	8.15	0.0163	0.002	0.1687	0.5064	3.0014	0.0976	0.52	5.3285	BG
maker-4_B_2L-snap-gene-67.149	0.1892	7.9416	41.9639	0.0001	0	0.0134	0.0922	0.0043	0.0464	0.0001	0	0.0063	0.0001	0	0.0359	BG
maker-2_E_3R-augustus-gene-44.6	1.1668	0.0975	0.0835	0.1183	0.0024	0.0207	0.1183	0.0024	0.0207	1.8013	0.0744	0.0413	0.0891	0	0	BG
maker-2_E_3R-augustus-gene-69.65	0.0096	0.0009	0.0926	0.0001	0	0	0.0001	0	0	0.0001	0	0.0991	0.4164	0	0	BG
maker-1_C_2R-augustus-gene-77.113	0.1439	0.1105	0.7679	0.1277	0.0097	0.0761	0.0543	0.0027	0.0499	0.1033	0.4484	4.3403	0.0001	0	0.0346	BG
maker-2_E_3R-augustus-gene-2.102	0.3414	3.1807	9.3161	9.0544	0.0016	0.0002	0.8087	0	0	0.1558	0.0024	0.0153	0.0001	0	0	BG
maker-2_E_3R-augustus-gene-26.103	0.0271	1.478	54.4891	0.0001	0	0.0062	0.0001	0	0	0.0001	0	0.007	0.0001	0	0	BG
maker-3_A_X-augustus-gene-107.18	0.1296	0.0965	0.7446	1.05	0.0021	0.002	0.4281	0.0014	0.0032	0.6	0.0012	0.002	0.0001	0	0	BG
maker-2_E_3R-augustus-gene-3.7	0.0672	0.0092	0.1366	0.0368	0.0007	0.02	0.0001	0	0.0082	0.0399	0.0007	0.0177	0.0001	0	0.0084	BG
maker-3_A_X-snap-gene-82.69	0.2088	0.1017	0.4869	0.0001	0	0.0236	0.0001	0	0	0.0001	0	0.0291	0.0001	0	0	BG
maker-4_B_2L-augustus-gene-57.69	0.2659	0.5003	1.8813	0.0001	0	0.0182	0.0001	0	0.02	0.0618	0.0015	0.0241	0.0814	0.001	0.0124	BG
maker-1_C_2R-snap-gene-47.13	0.0497	2.7279	54.9304	0.0448	0.0005	0.0122	0.0498	0.0017	0.0332	0.0001	0	0.0119	0.0512	0.0016	0.0314	BG
snap_masked-0_D_3L-processed-gene-44.40	0.0808	0.0411	0.5086	0.0347	0.001	0.0291	0.0365	0.0013	0.0348	0.027	0.0007	0.0276	0.0368	0.0014	0.0373	BG
maker-71_U_U-augustus-gene-0.3	0.1916	2.571	13.4191	0.4112	0	0	3.4152	0	0	1	0.002	0.002	0.0001	0	0	BG
augustus_masked-3_A_X-processed-gene-72.16	0.3352	0.2177	0.6496	0.4216	0.0044	0.0104	1.4	0.0028	0.002	0.2794	0.0065	0.0231	0.0001	0	0.0282	BG
augustus_masked-2_E_3R-processed-gene-12.0	0.1733	0.1158	0.6684	0.0001	0	0.0082	0.0758	0.0032	0.0417	0.0569	0.0007	0.0125	0.0882	0.0048	0.0539	BG
maker-1_C_2R-augustus-gene-42.113	0.0281	0.0125	0.4474	0.0001	0	0.0088	0.0001	0	0.031	0.0001	0	0.0136	0.0001	0	0.0216	BG
maker-1_C_2R-augustus-gene-83.88	0.177	0.1008	0.5694	0.038	0.0007	0.019	0.0989	0.0042	0.0424	0.233	0.0021	0.0089	0.2027	0.0051	0.025	BG
maker-1_C_2R-augustus-gene-2.98	0.3632	0.5161	1.4212	0.0496	0.0016	0.0317	0.3017	0	0	0.0001	0	0.0275	0.2509	0	0	BG
maker-2_E_3R-augustus-gene-7.86	0.0229	1.5971	69.6165	0.0001	0	0.0156	0.0001	0	0.0541	0.0001	0	0.0164	0.0553	0.0021	0.0372	BG
maker-2_E_3R-augustus-gene-67.116	0.0112	0.6974	62.28	0.0001	0	0.0156	0.0001	0	0	0.0001	0	0	0.0001	0	0.0232	BG
maker-1_C_2R-augustus-gene-68.108	0.2462	2.1503	8.7344	0.95	0.0019	0.002	0.0001	0	0	0.0001	0	0.0127	0.0001	0	0	BG
maker-2_E_3R-augustus-gene-107.88	0.1681	1.6935	10.077	0.1255	0.0009	0.0076	0.1169	0.0037	0.0321	0.0626	0.0013	0.0204	0.0471	0.0013	0.0286	BG
maker-3_A_X-augustus-gene-44.108	0.4899	13.3425	27.2353	4.6	0.0092	0.002	0.0001	0	0.0119	3.4	0.0068	0.002	0.0001	0	0.0253	BG
maker-3_A_X-augustus-gene-79.83	0.0527	0.0206	0.39	0.0216	0.0008	0.0357	0.0271	0.0008	0.0281	0.0422	0.0008	0.0183	0.0514	0.0015	0.0297	BG
maker-2_E_3R-snap-gene-33.198	0.0596	3.1382	52.6602	0.036	0.0005	0.0143	0.0638	0.0015	0.0243	0.0623	0.0016	0.0249	0.051	0.0015	0.0303	BG
maker-0_D_3L-augustus-gene-18.165	0.0712	0.0312	0.4387	0.114	0.0034	0.0299	0.0523	0.0005	0.0096	0.0302	0.001	0.0337	0.0816	0.0015	0.0179	BG
maker-2_E_3R-augustus-gene-21.103	0.0166	1.0278	61.8038	0.0001	0	0.0195	0.0001	0	0.0688	0.155	0.0011	0.0069	0.0272	0.0011	0.0392	BG
maker-1_C_2R-snap-gene-40.175	0.1152	0.0547	0.4749	0.0352	0.0003	0.0095	0.0314	0.0003	0.0094	0.1063	0.0007	0.0063	0.1432	0.0018	0.0129	BG
maker-0_D_3L-augustus-gene-38.147	0.7289	14.7489	20.2344	0.0001	0	0.0108	0.2098	0	0	0.0001	0	0	0.3633	0	0	BG
augustus_masked-2_E_3R-processed-gene-46.5	0.5383	0.6919	1.2855	0.6584	0.0175	0.0266	0.0001	0	0.0197	0.0983	0.0013	0.0133	0.0001	0	0.0318	BG
maker-2_E_3R-augustus-gene-98.83	0.1268	0.0533	0.4201	0.2837	0.0005	0.0016	0.0001	0	0.0039	0.0315	0.0007	0.0218	0.0001	0	0	BG
maker-2_E_3R-snap-gene-28.138	0.0918	0.0328	0.3574	0.1305	0.0019	0.0147	0.0001	0	0.036	0.1696	0.0028	0.0165	0.1289	0.0031	0.0243	BG
maker-1_C_2R-snap-gene-60.192	0.1154	1.7159	14.8747	0.0001	0	0.0072	0.0001	0	0	0.1447	0.003	0.0206	0.1786	0	0	BG
maker-1_C_2R-augustus-gene-27.77	0.0397	0.0212	0.5344	0.0232	0.0007	0.032	0.0268	0.0005	0.0189	0.0022	0.0001	0.0355	0.0001	0	0.0191	BG
maker-4_B_2L-augustus-gene-13.49	0.3035	0.1532	0.5049	0.5045	0.0014	0.0029	1.5	0.003	0.002	0.0001	0	0.0024	0.4088	0.0024	0.0058	BG
maker-0_D_3L-augustus-gene-49.15	0.0678	1.3309	19.6368	0.0001	0	0	0.0805	0.0014	0.0176	0.0001	0	0.0176	0.0001	0	0.0179	BG
maker-4_B_2L-augustus-gene-95.94	0.1089	0.0516	0.474	0.9	0.0018	0.002	0.0001	0	0	0.0001	0	0.0053	0.0001	0	0.0054	BG
augustus_masked-4_B_2L-processed-gene-77.7	0.0185	1.1445	61.8236	0.0392	0.0006	0.0157	0.0001	0	0.0247	0.0001	0	0.0161	0.0319	0.0007	0.0232	BG
maker-0_D_3L-augustus-gene-29.70	0.0529	1.5036	28.4244	0.0001	0	0.008	0.0339	0.0012	0.0355	0.1114	0.0014	0.0125	0.245	0.0024	0.0098	BG
snap_masked-3_A_X-processed-gene-65.24	0.1889	0.0623	0.3299	0.7276	0.0025	0.0034	0.0001	0	0.0144	0.1931	0	0	0.1216	0.0019	0.0159	BG
maker-4_B_2L-augustus-gene-50.75	0.6132	0.2068	0.3372	2.7	0.0054	0.002	0.3523	0.0029	0.0081	0.3195	0.0075	0.0235	0.0001	0	0.0094	BG
maker-2_E_3R-augustus-gene-38.127	0.1536	1.7143	11.1582	0.073	0.002	0.0275	0.0001	0	0.0148	0.0001	0	0.014	0.0744	0.0013	0.0179	BG
snap_masked-2_E_3R-processed-gene-47.32	0.0512	0.017	0.3313	0.0335	0.0004	0.0132	0.0175	0.0007	0.0405	0.025	0.0005	0.0187	0.0307	0.0011	0.0354	BG
augustus_masked-2_E_3R-processed-gene-62.8	0.0735	0.8925	12.1419	0.0001	0	0.006	0.0894	0.0022	0.0241	0.0001	0	0.0118	0.0222	0.0005	0.0234	BG
maker-0_D_3L-snap-gene-38.183	0.1889	0.0801	0.424	0.1211	0.0018	0.0146	0.443	0.001	0.0022	0.1426	0.0018	0.0123	0.193	0.001	0.0052	BG
augustus_masked-0_D_3L-processed-gene-18.29	0.2626	0.0997	0.3797	0.0001	0	0.0096	0.0001	0	0	0.062	0.0011	0.0183	0.0001	0	0	BG
maker-1_C_2R-augustus-gene-24.136	0.0435	0.0109	0.2513	0.0001	0	0	0.0001	0	0.0273	0.0001	0	0.0221	0.0001	0	0.0068	BG
maker-1_C_2R-augustus-gene-24.129	0.0632	1.818	28.7508	0.2285	0.0011	0.0049	0.0965	0.0011	0.0114	0.0452	0.0011	0.0247	0.1108	0.0017	0.015	BG
maker-3_A_X-augustus-gene-86.43	0.0815	0.0437	0.5364	0.0913	0.0037	0.0411	0.0001	0	0.0035	0.0001	0	0.0167	0.0001	0	0.0258	BG
maker-4_B_2L-augustus-gene-51.93	0.0324	0.0108	0.3353	0.0001	0	0.0212	0.0001	0	0.0422	0.0001	0	0.0209	0.0001	0	0.0459	BG
maker-1_C_2R-augustus-gene-79.120	0.1548	0	0	0.0001	0	0.0165	0.0001	0	0.0726	0.0001	0	0.0127	3.1731	0	0	BG
maker-3_A_X-snap-gene-65.76	0.0871	0.0196	0.2246	0.2373	0.0008	0.0033	0.0001	0	0.0194	0.0001	0	0.0097	0.0736	0.0008	0.0109	BG
maker-0_D_3L-augustus-gene-71.89	0.2975	3.3802	11.3616	0.4604	0.0024	0.0053	0.0001	0	0	1.459	0.0034	0.0023	0.0001	0	0	BG
snap_masked-4_B_2L-processed-gene-35.2	0.4848	0.0344	0.0709	0.0001	0	0.0042	0.5049	0.0301	0.0595	0.5233	0.0019	0.0037	0.5049	0.0301	0.0595	BG
maker-0_D_3L-augustus-gene-86.7	0.056	3.1386	56.0559	0.0001	0	0.0206	0.0879	0.0029	0.0328	0.0001	0	0.0099	0.0001	0	0.0488	BG
maker-3_A_X-snap-gene-58.103	0.0823	1.6661	20.2466	0.024	0.0005	0.0205	0.0702	0.001	0.014	0.0001	0	0.0063	0.0913	0.001	0.0108	BG
maker-3_A_X-augustus-gene-39.66	0.009	0.5866	65.0741	0.0001	0	0.0075	0.0242	0.0008	0.0318	0.0001	0	0.0295	0.0193	0.0008	0.0413	BG
augustus_masked-1_C_2R-processed-gene-1.9	0.1031	0.0344	0.334	0.3635	0	0	0.0001	0	0	0.2706	0	0	0.0001	0	0	BG
maker-4_B_2L-augustus-gene-5.102	0.144	0.0732	0.5083	0.1419	0.0017	0.0121	0.029	0.001	0.0363	0.2509	0.0017	0.0069	0.0493	0.001	0.0207	BG
maker-4_B_2L-augustus-gene-64.63	0.0352	0.0165	0.47	0.0001	0	0.0131	0.0113	0.0006	0.049	0.0306	0.0005	0.0175	0.0217	0.0011	0.0494	BG
maker-3_A_X-snap-gene-52.73	0.108	0.0939	0.8691	0.0001	0	0.0146	0.0001	0	0.0259	0.0422	0.0008	0.0194	0.0001	0	0.0329	BG
maker-2_E_3R-snap-gene-42.88	0.0514	0.0153	0.2976	0.0001	0	0.0153	0.0001	0	0.0121	0.0001	0	0.0206	0.0001	0	0.0118	BG
maker-2_E_3R-augustus-gene-60.128	0.0283	1.2606	44.6066	0.0001	0	0.014	0.1592	0.0009	0.0056	0.0001	0	0.0136	0.0001	0	0	BG
maker-4_B_2L-augustus-gene-75.70	0.1372	0.0839	0.6115	0.1983	0.0017	0.0086	0.1918	0.0018	0.0092	0.2955	0.0008	0.0029	0.0001	0	0.003	BG
maker-3_A_X-augustus-gene-14.82	0.047	0.016	0.3396	0.0001	0	0.0178	0.0001	0	0.018	0.0001	0	0.0207	0.0001	0	0.0141	BG
snap_masked-4_B_2L-processed-gene-2.53	0.2958	0.1144	0.3869	0.0001	0	0.0059	0.4367	0.0038	0.0087	0.0001	0	0	0.0001	0	0.0137	BG
maker-2_E_3R-snap-gene-78.173	0.0687	0	0	0.0001	0	0.0223	0.0001	0	0.0298	0.0317	0.001	0.0321	0.0268	0.0009	0.033	BG
augustus_masked-4_B_2L-processed-gene-18.10	0.0641	0.0262	0.4088	0.0001	0	0.0157	0.0001	0	0.007	0.0001	0	0.0146	0.3076	0.0035	0.0112	BG
maker-2_E_3R-augustus-gene-63.132	0.0654	0.0444	0.6786	0.0606	0.0012	0.02	0.0001	0	0	0.0185	0.0006	0.0328	0.0001	0	0	BG
maker-2_E_3R-snap-gene-93.90	0.0488	0.0256	0.5253	0.0218	0.0008	0.037	0.0001	0	0.0389	0.0233	0.0007	0.0287	0.0001	0	0.0452	BG
maker-6_F_4-augustus-gene-1.7	0.085	0.049	0.5765	0.0001	0	0.0077	1.2176	0	0	0.3532	0	0	0.0001	0	0	BG
snap_masked-4_B_2L-processed-gene-33.70	0.0556	0.0172	0.31	0.0001	0	0.0082	0.0457	0.002	0.0442	0.025	0.0004	0.016	0.0496	0.0016	0.0326	BG
augustus_masked-4_B_2L-processed-gene-77.12	0.1405	0.0476	0.3389	0.0983	0.0022	0.0227	0.0654	0.0019	0.0298	0.2057	0.004	0.0194	0.0615	0.0017	0.0275	BG
maker-2_E_3R-augustus-gene-27.109	0.1647	0.0121	0.0737	0.0001	0	0	0.0001	0	0	0.1319	0.0107	0.0812	0.1183	0	0	BG
maker-2_E_3R-snap-gene-88.9	0.7362	1.0744	1.4593	0.3229	0	0	0.0001	0	0	0.0934	0	0	0.0001	0	0	BG
maker-0_D_3L-augustus-gene-38.146	0.4929	0.29	0.5885	0.2895	0	0	0.0001	0	0	0.6036	0.008	0.0132	0.0001	0	0	BG
maker-0_D_3L-augustus-gene-70.109	0.421	0.9516	2.2603	0.0001	0	0.0207	0.0001	0	0	0.2675	0.0039	0.0146	2.3914	0	0	BG
maker-2_E_3R-augustus-gene-3.68	0.0491	2.7024	55.0351	0.0001	0	0.0159	0.0001	0	0.0295	0.0001	0	0.0095	0.0569	0.0017	0.0307	BG
maker-4_B_2L-snap-gene-31.100	0.0979	0.0072	0.0732	0.0473	0.0006	0.0117	0.077	0.0063	0.0815	0.0537	0.001	0.0182	0.077	0.0063	0.0815	BG
maker-3_A_X-augustus-gene-95.67	0.1176	1.7052	14.4956	0.081	0.0014	0.0179	0.0001	0	0.0263	0.2287	0.0044	0.0191	0.0367	0.0014	0.0388	BG
augustus_masked-6_F_4-processed-gene-4.4	0.1473	0.1489	1.0107	0.0001	0	0	0.0001	0	0.0034	0.176	0.0015	0.0086	0.0001	0	0	BG
maker-3_A_X-snap-gene-39.89	0.1766	0.1168	0.6616	0.0297	0.0005	0.0179	0.0591	0.002	0.0336	0.0576	0.001	0.0169	0.05	0.0015	0.0298	BG
maker-1_C_2R-augustus-gene-59.96	0.0908	0.0682	0.7517	0.0745	0.0022	0.03	0.0001	0	0	0.0395	0.0015	0.0373	0.0001	0	0	BG
maker-3_A_X-augustus-gene-25.85	0.0667	0.0353	0.5293	0.0001	0	0.0266	0.0001	0	0.0225	0.2292	0.0028	0.012	0.0001	0	0.0193	BG
maker-4_B_2L-augustus-gene-18.135	0.0292	0.0126	0.4309	0.0001	0	0.0151	0.3437	0.0007	0.0021	0.0583	0.0006	0.0108	0.0001	0	0.0097	BG
maker-0_D_3L-augustus-gene-76.85	0.0727	0.0281	0.386	0.0001	0	0.0073	0.2184	0.0018	0.0081	0.0001	0	0.031	0.0699	0.0017	0.0246	BG
maker-0_D_3L-augustus-gene-63.94	0.0069	0.003	0.4375	0.0001	0	0.0236	0.0138	0.0006	0.0468	0.0001	0	0.0288	0.0001	0	0.0598	BG
maker-3_A_X-augustus-gene-28.89	0.032	1.2421	38.848	0.3711	0.0025	0.0067	0.0777	0.0025	0.0316	0.0001	0	0.0652	0.0435	0.0025	0.0567	BG
maker-2_E_3R-augustus-gene-16.115	0.0558	3.0737	55.1006	0.0001	0	0.0106	0.0192	0.001	0.0544	0.0001	0	0.0344	0.0001	0	0.0361	BG
maker-0_D_3L-augustus-gene-74.9	0.4814	0.1715	0.3562	0.3493	0	0	0.0001	0	0.0388	0.4008	0	0	0.0001	0	0.0466	BG
maker-2_E_3R-augustus-gene-47.	0.555	0.7681	1.384	1.6448	0.0074	0.0045	0.1172	0.0087	0.0741	1.144	0.0051	0.0045	0.3466	0.0095	0.0273	BG
maker-1_C_2R-augustus-gene-47.94	0.1268	1.5815	12.471	0.0001	0	0.0192	0.3053	0.0038	0.0124	0.061	0.0017	0.0273	0.0889	0.0012	0.0133	BG
snap_masked-3_A_X-processed-gene-44.90	0.2228	0.2888	1.2962	0.1311	0.0015	0.0111	0.0645	0.0011	0.0166	0.0001	0	0.0176	0.0113	0.0004	0.0311	BG
maker-3_A_X-augustus-gene-80.62	0.3325	0.1914	0.5756	0.5485	0.0232	0.0423	0.5063	0.0043	0.0085	0.3128	0.0105	0.0334	1.0436	0.0341	0.0326	BG
augustus_masked-0_D_3L-processed-gene-36.9	0.2219	8.6086	38.7989	0.3722	0	0	0.0906	0.0018	0.0199	0.0001	0	0.0052	0.0712	0.0019	0.0261	BG
maker-3_A_X-augustus-gene-64.8	0.1036	0.0458	0.4418	0.0001	0	0.0232	0.0221	0.0008	0.037	0.0241	0.0008	0.0336	0.0466	0.0008	0.0175	BG
maker-0_D_3L-augustus-gene-14.87	0.2214	8.87	40.0673	0.5348	0.0033	0.0062	0.0001	0	0.0081	0.554	0.0034	0.0062	0.0001	0	0.0082	BG
snap_masked-1_C_2R-processed-gene-50.80	0.3633	0.1131	0.3114	0.1108	0.0027	0.0244	0.0001	0	0	0.05	0.0006	0.0119	0.0001	0	0	BG
maker-2_E_3R-augustus-gene-88.75	0.0833	1.9292	23.1637	0.3617	0.0039	0.0108	0.0001	0	0.0346	0.0864	0.0019	0.0225	0.0001	0	0.0228	BG
maker-2_E_3R-augustus-gene-76.79	0.1627	1.3866	8.5207	0.0001	0	0.0073	0.0001	0	0.0149	0.0001	0	0.0111	0.0001	0	0.0149	BG
maker-4_B_2L-augustus-gene-34.142	0.4122	0.7283	1.7667	36.7648	0.0023	0.0001	0.0416	0.4132	9.9444	0.2127	0.0048	0.0224	16.4	0.0328	0.002	BG
maker-4_B_2L-augustus-gene-70.139	0.1237	0.7171	5.7984	0.7493	0.0033	0.0045	0.0001	0	0.0051	0.1692	0.0043	0.0254	0.0001	0	0.0111	BG
maker-4_B_2L-augustus-gene-43.85	0.0134	0.8253	61.6389	0.0001	0	0.0016	0.0001	0	0.0027	0.0599	0.0009	0.0146	0.0001	0	0.0027	BG
maker-2_E_3R-augustus-gene-60.139	0.3038	1.1206	3.6883	1.55	0.0031	0.002	2.4	0.0048	0.002	0.2736	0.0025	0.009	0.0001	0	0.0242	BG
maker-4_B_2L-augustus-gene-34.16	0.0394	2.2938	58.2706	0.0224	0.0003	0.0146	0.0217	0.0007	0.0302	0.0001	0	0.0108	0.0001	0	0.0311	BG
augustus_masked-2_E_3R-processed-gene-104.17	0.0586	0.0297	0.5077	0.3394	0.0015	0.0044	0.1148	0.0015	0.0128	0.4553	0.0015	0.0033	0.0001	0	0	BG
augustus_masked-2_E_3R-processed-gene-22.2	0.1852	7.8727	42.51	0.6089	0.0032	0.0053	0.0001	0	0.026	0.2975	0.0081	0.0272	0.0001	0	0.0224	BG
maker-0_D_3L-augustus-gene-31.115	0.5458	0.861	1.5776	8.4416	0.002	0.0002	0.0001	0	0	0.5	0.001	0.002	0.0001	0	0.0108	BG
maker-2_E_3R-augustus-gene-57.15	0.0275	0.652	23.7095	0.0001	0	0	0.0001	0	0	0.0382	0.0014	0.037	0.0324	0.0028	0.0867	BG
maker-0_D_3L-augustus-gene-62.140	0.0549	0.0025	0.0453	0.0001	0	0.0082	0.0001	0	0.0097	0.0001	0	0.008	0.0001	0	0.0127	BG
maker-2_E_3R-augustus-gene-35.118	0.2535	0.0852	0.3362	0.85	0.0017	0.002	0.121	0.0013	0.0105	0.0262	0.0004	0.0147	0.4777	0.0034	0.0072	BG
maker-0_D_3L-augustus-gene-85.94	0.0111	0.6913	62.1338	0.0001	0	0.0116	0.0001	0	0.0399	0.0001	0	0.0151	0.0001	0	0.03	BG
maker-1_C_2R-snap-gene-11.110	0.1224	0.0683	0.5576	0.0001	0	0.0123	0.1443	0.0051	0.0353	0.0001	0	0.0368	0.0001	0	0.0318	BG
maker-2_E_3R-augustus-gene-47.124	0.3384	1.9085	5.6404	0.0902	0.0029	0.0321	0.1036	0.0036	0.0351	0.0229	0.0006	0.0266	0.2489	0.007	0.0282	BG
maker-2_E_3R-augustus-gene-57.148	0.1399	0.061	0.4358	0.7205	0.0041	0.0057	0.1805	0.0011	0.0059	0.2786	0.0045	0.0162	0.6137	0.0034	0.0055	BG
maker-2_E_3R-augustus-gene-17.102	0.0849	0.0489	0.5768	0.0334	0.0009	0.0264	0.0815	0.0021	0.0253	0.0488	0.0013	0.0258	0.032	0.0007	0.0234	BG
maker-2_E_3R-augustus-gene-5.119	0.1384	6.6507	48.0522	0.182	0.0008	0.0042	0.1021	0.0016	0.0159	0.1482	0.0015	0.0104	0.0534	0.0008	0.0145	BG
maker-1_C_2R-augustus-gene-16.109	0.0922	1.3986	15.1686	0.0682	0.0009	0.0136	0.0714	0.0039	0.0539	0.0001	0	0.0295	0.0246	0.0009	0.038	BG
maker-6_F_4-snap-gene-1.85	0.0515	2.7102	52.5942	0.4342	0	0	0.0001	0	0.0109	0.85	0.0017	0.002	0.0001	0	0.0054	BG
snap_masked-0_D_3L-processed-gene-78.63	0.0758	0.0248	0.3268	0.0001	0	0.0108	0.0001	0	0	0.0001	0	0.0049	0.0001	0	0	BG
augustus_masked-1_C_2R-processed-gene-29.8	0.5606	0.3669	0.6545	0.2778	0	0	0.2905	0.2138	0.736	0.3493	0	0	0.9589	0.0815	0.085	BG
augustus_masked-4_B_2L-processed-gene-12.5	0.0547	0.003	0.0544	0.0001	0	0.0041	0.0526	0.0006	0.0107	0.0001	0	0.0165	0.0552	0.0005	0.0099	BG
maker-3_A_X-augustus-gene-13.72	0.0168	0.0095	0.5645	0.0001	0	0.0057	0.0001	0	0.0182	0.0001	0	0.0112	0.0001	0	0.0142	BG
maker-3_A_X-snap-gene-90.50	0.4144	0.1486	0.3586	0.8779	0	0	2.4	0.0048	0.002	1.65	0.0033	0.002	0.4309	0	0	BG
augustus_masked-2_E_3R-processed-gene-38.38	0.1694	0.1125	0.6643	0.0001	0	0.0117	0.1893	0.0049	0.026	0.1489	0.0032	0.0218	0.3418	0.009	0.0262	BG
maker-2_E_3R-augustus-gene-47.114	0.0127	0.0036	0.2838	0.0001	0	0.0095	0.0383	0.0014	0.0367	0.0705	0.0014	0.0193	0.0001	0	0.0259	BG
maker-0_D_3L-augustus-gene-51.17	0.0737	0.0048	0.0653	0.0001	0	0	0.0001	0	0	1.1446	0.0122	0.0106	0.2889	0	0	BG
maker-3_A_X-augustus-gene-4.53	0.1173	0.0517	0.4408	0.0868	0.002	0.0227	0.5568	0.017	0.0305	0.1355	0.0017	0.0124	0.1159	0.0032	0.0278	BG
augustus_masked-1_C_2R-processed-gene-25.34	0.096	0.0328	0.3417	0.1293	0.0012	0.0091	0.0001	0	0	0.0873	0.0015	0.0175	0.0001	0	0	BG
maker-4_B_2L-augustus-gene-82.110	0.0736	0.0402	0.5454	0.0465	0.0009	0.0201	0.025	0.001	0.0415	0.0393	0.0009	0.0238	0.0907	0.0061	0.067	BG
maker-3_A_X-augustus-gene-67.53	0.1964	0.0953	0.4856	0.1226	0.0018	0.0144	0.0001	0	0	0.077	0.0018	0.023	0.293	0	0	BG
maker-0_D_3L-augustus-gene-8.87	0.0135	0.8861	65.7445	0.0001	0	0.011	0.0001	0	0.0331	0.0001	0	0.014	0.0001	0	0.0273	BG
snap_masked-3_A_X-processed-gene-51.46	0.1787	0.1882	1.0534	0.1038	0.0015	0.0147	0.0542	0.0007	0.0134	0.0426	0.0008	0.0186	0.0399	0.0006	0.0155	BG
maker-2_E_3R-augustus-gene-41.69	0.0191	0.7425	38.8164	0.0001	0	0.0106	0.0001	0	0.0042	0.0001	0	0.0022	0.0001	0	0.0043	BG
augustus_masked-0_D_3L-processed-gene-14.4	0.1132	0.0647	0.5716	0.0001	0	0.0026	0.1068	0.0018	0.0173	0.45	0.0009	0.002	0.0001	0	0.0065	BG
augustus_masked-0_D_3L-processed-gene-15.47	0.0187	0.009	0.4817	0.0001	0	0.0056	0.0001	0	0.0029	0.0001	0	0.0117	0.0001	0	0.0058	BG
maker-3_A_X-augustus-gene-7.74	0.5465	0.9033	1.6529	0.0001	0	0.0098	0.5696	0.0056	0.0099	0.0001	0	0.0098	1.35	0.0027	0.002	BG
snap_masked-0_D_3L-processed-gene-60.83	0	0	0.0479	NA	NA	NA	NA	NA	NA	NA	NA	NA	NA	NA	NA	BG
maker-0_D_3L-augustus-gene-87.70	0.0795	2.42	30.4535	0.0311	0.0006	0.0205	0.0205	0.0007	0.0328	0.0583	0.0006	0.0108	0.0203	0.0007	0.0356	BG
maker-5_U_U-augustus-gene-4.46	0.0673	0.8975	13.3287	0.4344	0	0	0.131	0.0057	0.0438	0.3609	0	0	0.0001	0	0.0144	BG
maker-2_E_3R-augustus-gene-29.98	0.1978	0.3702	1.8721	0.0144	0.0007	0.049	6	0.012	0.002	0.0001	0	0.0453	5.7	0.0114	0.002	BG
maker-2_E_3R-augustus-gene-37.114	0.0702	0.0268	0.3823	0.0001	0	0.0188	0.0332	0.0013	0.0386	0.0001	0	0.0113	0.2565	0.0038	0.0148	BG
maker-3_A_X-augustus-gene-49.23	0.2973	3.2692	10.998	1.55	0.0031	0.002	0.3677	0	0	0.1375	0.0031	0.0226	0.0001	0	0	BG
maker-2_E_3R-augustus-gene-77.88	0.0982	0.0278	0.2828	0.0001	0	0.0072	0.0001	0	0	0.0001	0	0.0185	0.0001	0	0	BG
maker-4_B_2L-augustus-gene-6.45	0.0129	0.7084	55.1183	0.0001	0	0.0128	0.1013	0.0014	0.014	0.0001	0	0.0124	0.0001	0	0.0364	BG
maker-1_C_2R-snap-gene-9.194	0.5091	0.2695	0.5295	0.3947	0	0	0.0001	0	0.0064	0.0001	0	0.0064	0.2516	0	0	BG
maker-3_A_X-snap-gene-91.39	1.346	1.718	1.2764	85.5942	0.0052	0.0001	0	0	0.002	3.1299	0	0	0.0001	0	0	BG
maker-4_B_2L-snap-gene-85.98	0.0894	0.0438	0.4901	0.0001	0	0.0086	0.0001	0	0	0.0282	0.0009	0.0332	0.0001	0	0	BG
maker-0_D_3L-augustus-gene-18.160	0.2057	0.0098	0.0475	0.3899	0	0	0.5219	0	0	0.0001	0	0.0142	0.4832	0	0	BG
maker-0_D_3L-augustus-gene-17.109	0.0852	0.0251	0.2942	0.1053	0.0017	0.0163	0.0001	0	0.0192	0.0001	0	0	0.0001	0	0.0115	BG
maker-2_E_3R-augustus-gene-48.98	0.1016	0.0367	0.3613	0.2347	0	0	0.0001	0	0.0074	0.4353	0.0033	0.0075	0.2113	0.0033	0.0155	BG
maker-2_E_3R-augustus-gene-71.124	0.0537	3.0009	55.8749	0.1393	0.0018	0.0128	0.0001	0	0.0268	0.0001	0	0.0149	0.028	0.0018	0.0634	BG
maker-4_B_2L-augustus-gene-61.85	0.0299	0.0094	0.3135	0.0001	0	0.0347	0.0001	0	0	0.0001	0	0.0303	0.0001	0	0	BG
maker-3_A_X-augustus-gene-64.78	0.1619	1.3423	8.293	0.0001	0	0.0023	0.0001	0	0.0104	0.0001	0	0.0187	0.0501	0.0008	0.0158	BG
maker-3_A_X-augustus-gene-43.82	0.0962	4.6889	48.7288	0.0449	0.0006	0.0138	0.2069	0.0013	0.0063	0.1986	0.0019	0.0094	0.0001	0	0.0019	BG
maker-0_D_3L-augustus-gene-42.117	0.0334	0.0007	0.0219	0.1118	0.0017	0.0156	0	0	0.002	0.0001	0	0.0081	0.0001	0	0	BG
augustus_masked-2_E_3R-processed-gene-45.2	0.3915	3.7037	9.4612	0.0001	0	0.0089	0.2467	0.0065	0.0263	0.0001	0	0.009	0.2807	0.0081	0.029	BG
maker-0_D_3L-augustus-gene-36.177	0.1587	0.1262	0.7952	0.1535	0.0015	0.0098	0.0001	0	0.0014	0.0613	0.0005	0.0081	0.0001	0	0	BG
maker-1_C_2R-augustus-gene-8.117	0.032	0.0021	0.0648	0.0001	0	0.0168	0.0001	0	0.0715	0.0486	0.0033	0.0683	NA	NA	NA	BG
maker-1_C_2R-augustus-gene-71.166	0.039	2.2683	58.1681	0.0001	0	0.0264	0.0001	0	0	0.0746	0.0016	0.0209	0.0001	0	0	BG
maker-0_D_3L-augustus-gene-64.109	0.089	1.3957	15.6825	0.1014	0.0014	0.0134	0.1468	0.0041	0.0277	0.0739	0.0014	0.0184	0.0994	0.0027	0.0273	BG
maker-3_A_X-snap-gene-4.66	0.1702	1.0907	6.4093	0.0001	0	0.0082	0.0935	0.0024	0.026	0.0001	0	0.0082	0.0465	0.002	0.0433	BG
maker-2_E_3R-augustus-gene-92.82	0.0904	0.0387	0.4279	0.1732	0.0038	0.022	0.0001	0	0	0.0486	0.0008	0.016	0.5367	0	0	BG
maker-4_B_2L-augustus-gene-49.118	0.0289	0.4285	14.8249	0.0158	0.0015	0.0955	0.0001	0	0	0.0094	0.2516	26.6448	0.0001	0	0	BG
maker-1_C_2R-augustus-gene-61.113	0.12	0.0336	0.2802	0.4073	0	0	0.3353	0	0	0.3009	0.0051	0.0171	0.2424	0	0	BG
maker-2_E_3R-augustus-gene-46.132	0.9924	0.0355	0.0358	0.3688	0	0	0.7863	0.0293	0.0373	0.3121	0.0051	0.0164	0.7863	0.0293	0.0373	BG
maker-57_U_U-snap-gene-0.3	0.1798	0.0868	0.4826	0.0001	0	0.0076	0.0001	0	0.0015	0.2125	0.002	0.0094	0.0001	0	0.003	BG
snap_masked-1_C_2R-processed-gene-54.5	0.1395	0.0052	0.0369	0.0001	0	0	0.0271	0.0026	0.0971	0.055	0.0011	0.0203	NA	NA	NA	BG
maker-4_B_2L-augustus-gene-96.75	0.1262	2.052	16.2652	0.4017	0	0	0.0001	0	0.0194	0.0001	0	0.009	0.0001	0	0.009	BG
snap_masked-2_E_3R-processed-gene-65.64	0.0557	0.0157	0.2817	0.0001	0	0.0084	0.0001	0	0.0041	0.0001	0	0.0083	0.2849	0.0012	0.0042	BG
maker-1_C_2R-augustus-gene-71.143	0.0957	1.73	18.079	0.1161	0.0009	0.0076	0.0001	0	0	0.0818	0.0003	0.0036	0.0001	0	0	BG
maker-2_E_3R-snap-gene-56.103	0.1149	0.02	0.1743	0.0001	0	0.0026	0.0001	0	0.0195	0.0726	0.0011	0.0146	0.0001	0	0.0095	BG
maker-0_D_3L-snap-gene-89.46	0.077	0.0613	0.7964	0.0001	0	0.0136	0.0001	0	0.0252	0.0746	0.0019	0.0255	0.0001	0	0.0403	BG
maker-0_D_3L-augustus-gene-8.73	1.5293	0.8729	0.5708	0.6928	0.013	0.0188	0.7872	0.0269	0.0341	0.3636	0.0044	0.0121	0.5442	0.0029	0.0054	BG
maker-1_C_2R-augustus-gene-19.115	0.0148	0.0024	0.1637	0.0001	0	0.0384	0.0187	0.0009	0.0487	0.0001	0	0.0196	0.0001	0	0.019	BG
maker-4_B_2L-augustus-gene-52.109	0.0608	0.035	0.5749	0.0797	0.0013	0.0166	0.1337	0.0025	0.0188	0.03	0.0007	0.0225	0.1089	0.0025	0.023	BG
snap_masked-4_B_2L-processed-gene-45.95	0.0863	0.0396	0.4588	0.0001	0	0.0228	0.0366	0.0017	0.0452	0.0211	0.0008	0.0396	0.0719	0.0033	0.0463	BG
augustus_masked-0_D_3L-processed-gene-25.	0.062	0.0229	0.3692	0.0001	0	0.0099	0.0001	0	0.02	0.3399	0.0034	0.01	0.1607	0.0033	0.0207	BG
maker-4_B_2L-augustus-gene-34.169	0.3513	0.9308	2.6496	0.0001	0	0.0077	0.1905	0.0087	0.0457	0.0001	0	0.0178	0.0425	0.0009	0.0208	BG
maker-1_C_2R-snap-gene-19.149	0.0653	2.1501	32.9399	0.0364	0.0005	0.0138	0.0824	0.0003	0.0042	0.0214	0.0003	0.0158	0.0001	0	0.0039	BG
augustus_masked-1_C_2R-processed-gene-3.5	0.3291	0.1682	0.511	0.3406	0	0	0.0001	0	0	0.3955	0	0	0.2151	0	0	BG
maker-0_D_3L-augustus-gene-89.32	0.0068	0.0015	0.2128	0.0001	0	0.0079	0.2345	0.0038	0.0162	0.0001	0	0.0202	0.0001	0	0.0168	BG
maker-2_E_3R-augustus-gene-65.97	0.0725	0.004	0.0545	0.0001	0	0.007	0.1259	0.0023	0.0182	0.0001	0	0.0123	0.0001	0	0.0088	BG
maker-4_B_2L-augustus-gene-52.102	0.0445	2.2653	50.8766	0.0252	0.0007	0.0287	0.0376	0.0014	0.0384	0.0257	0.0007	0.0281	0.0252	0.0014	0.0572	BG
augustus_masked-1_C_2R-processed-gene-50.6	0.2168	0.0788	0.3636	0.0361	0.0008	0.0212	0.3665	0	0	0.1511	0.0015	0.0102	0.2856	0	0	BG
snap_masked-2_E_3R-processed-gene-104.3	0.0594	0.0283	0.4766	0.02	0.0003	0.017	0.0246	0.0011	0.0432	0.0659	0.0014	0.0206	0.0358	0.0014	0.0382	BG
maker-2_E_3R-augustus-gene-103.66	0.1092	0.0517	0.4731	0.2012	0.0022	0.0108	0.0259	0.0015	0.0597	0.0757	0.0015	0.0199	0.0202	0.0014	0.0679	BG
maker-0_D_3L-snap-gene-14.13	0.1329	0.0438	0.3298	0.0577	0.0008	0.0144	0.4221	0.0075	0.0177	0.1454	0.0022	0.0151	0.4453	0.0047	0.0105	BG
maker-2_E_3R-snap-gene-25.108	0.0226	0.0028	0.123	0.0001	0	0.0126	0.0733	0.0009	0.012	0.0001	0	0	0.0851	0.0008	0.0098	BG
augustus_masked-4_B_2L-processed-gene-30.23	0.0514	1.9926	38.7952	0.0504	0.0005	0.0094	0.0339	0.0016	0.0462	0.0508	0.0009	0.0186	0.0001	0	0.0373	BG
maker-4_B_2L-augustus-gene-32.62	0.3394	0.2367	0.6975	0.3629	0.0095	0.0262	0.3324	0.0068	0.0205	0.6663	0.0018	0.0027	0.106	0.0013	0.0121	BG
augustus_masked-0_D_3L-processed-gene-16.19	4.0523	0.9339	0.2305	0.3891	0	0	0.4552	0	0	0.3633	0	0	0.3922	0	0	BG
maker-1_C_2R-augustus-gene-2.10	0.1275	0.0136	0.107	0.0444	0.0011	0.0246	0.0001	0	0	0.0001	0	0.0009	0.0001	0	0	BG
maker-2_E_3R-augustus-gene-2.104	0.015	0.0001	0.0041	1.2	0.0024	0.002	0.0001	0	0.006	0.0001	0	0.0119	0.1374	0	0	BG
maker-1_C_2R-augustus-gene-28.103	0.1825	3.1946	17.5027	0.0853	0.0019	0.0219	0.0001	0	0	0.2001	0.0053	0.0264	0.0001	0	0	BG
augustus_masked-2_E_3R-processed-gene-21.2	0.1636	0.0673	0.4112	0.0001	0	0.0161	0.0912	0.0012	0.0132	0.0001	0	0.0071	0.0809	0.0012	0.0149	BG
maker-4_B_2L-augustus-gene-40.105	0.093	0.0649	0.6984	0.0428	0.0007	0.0166	0.0296	0.0009	0.0303	0.0155	0.0005	0.0347	0.0359	0.0015	0.041	BG
maker-2_E_3R-augustus-gene-10.89	0.024	0.004	0.1652	0.0001	0	0.0097	0.0001	0	0.0342	0.0001	0	0.0087	0.0001	0	0.0403	BG
maker-3_A_X-augustus-gene-62.75	0.0899	0.0398	0.442	0.3354	0.0019	0.0056	0.053	0.0019	0.0365	0.0001	0	0.0177	0.0642	0.0019	0.0297	BG
maker-0_D_3L-augustus-gene-79.14	0.0107	0.0043	0.4081	0.0001	0	0.0211	0.0249	0.0005	0.0192	0.0001	0	0.0247	0.0001	0	0.0135	BG
maker-4_B_2L-augustus-gene-17.60	0.0302	0.2465	8.1655	0.1045	0.0014	0.013	0.0393	0.0005	0.0116	0.0591	0.0009	0.0153	0.0001	0	0.018	BG
snap_masked-2_E_3R-processed-gene-67.65	0.0859	0.078	0.9081	0.0723	0.0006	0.0084	0.1137	0.0012	0.0106	0.0251	0.0006	0.0242	0.0233	0.0006	0.0261	BG
maker-1_C_2R-augustus-gene-22.94	0.0243	0.0121	0.4976	0.0001	0	0.0108	NA	NA	NA	0.038	0.0005	0.0139	0.0333	0.0005	0.0158	BG
maker-1_C_2R-augustus-gene-7.8	0.015	0.0002	0.0166	0.3628	0	0	0.0001	0	0	0.0001	0	0.0194	0.0001	0	0.0194	BG
maker-2_E_3R-augustus-gene-82.127	0.0089	0.0011	0.1256	0.0001	0	0.0348	0.0001	0	0	0.0001	0	0.0322	0.0001	0	0.0079	BG
maker-0_D_3L-augustus-gene-73.144	0.0791	0.0446	0.5635	0.7	0.0014	0.002	0.3048	0.0015	0.005	0.2952	0.0049	0.0167	0.0001	0	0.0105	BG
maker-120_U_U-augustus-gene-0.2	0.2096	0.1388	0.6622	0.1071	0.0024	0.022	0.0547	0.0031	0.0576	0.1138	0.0016	0.0136	0.1156	0.0023	0.0202	BG
augustus_masked-1_C_2R-processed-gene-70.17	0.2901	0.8155	2.8109	0.1592	0.0033	0.0209	0.1689	0.0082	0.0484	0.0801	0.0021	0.0262	0.1017	0.0031	0.03	BG
maker-1_C_2R-augustus-gene-24.134	0.3814	0.6482	1.6997	0.3993	0	0	0.4898	0	0	0.4919	0	0	0.293	0	0	BG
maker-2_E_3R-snap-gene-20.106	0.1844	0.0255	0.1382	0.0001	0	0.0075	0.0724	0.0014	0.019	0.0001	0	0	0.1817	0.0014	0.0076	BG
maker-2_E_3R-augustus-gene-10.88	0.1592	0.0857	0.5382	0.3132	0.0037	0.0119	0.0718	0.0012	0.0171	0.121	0.0025	0.0207	0.2349	0.0037	0.0158	BG
maker-4_B_2L-augustus-gene-40.123	0.0811	0.0201	0.2474	0.0461	0.0009	0.0189	0.2045	0.0064	0.0312	0.0001	0	0.0046	0.4042	0.0044	0.011	BG
maker-1_C_2R-augustus-gene-44.168	0.1548	2.6667	17.222	0.0766	0.0017	0.022	0.334	0.0009	0.0026	0.0001	0	0.0092	0.3132	0.0017	0.0054	BG
maker-0_D_3L-augustus-gene-82.6	0.1372	0.0339	0.247	0.0001	0	0.0208	0.0001	0	0.004	0.0928	0.0015	0.0159	0.0001	0	0	BG
maker-4_B_2L-augustus-gene-72.80	0.4495	0.4659	1.0365	0.3505	0	0	3.05	0.0061	0.002	0.1564	0	0	0.1409	0.0074	0.0528	BG
maker-2_E_3R-augustus-gene-25.87	0.0061	0	0.0006	0.4052	0	0	0.0001	0	0.0077	0.2161	0	0	0.0001	0	0.017	BG
augustus_masked-3_A_X-processed-gene-30.14	0.1391	0.0724	0.5205	0.0001	0	0.0058	2.05	0.0041	0.002	0.0001	0	0.0115	0.0339	0.7315	21.571	BG
augustus_masked-0_D_3L-processed-gene-61.2	0.1395	6.9856	50.0657	0.0001	0	0	0.0001	0	0.0599	0.0001	0	0.0192	0.1764	0.0138	0.0782	BG
maker-2_E_3R-augustus-gene-18.106	0.0168	1.0704	63.6761	0.0001	0	0.0163	0.0001	0	0.0125	0.0413	0.0006	0.0157	0.0247	0.0006	0.0261	BG
maker-2_E_3R-augustus-gene-10.10	0.1267	1.3725	10.8314	0.345	0	0	0.0001	0	0.0079	0.387	0	0	0.076	0.0038	0.0505	BG
maker-4_B_2L-augustus-gene-57.68	0.077	0.0358	0.4652	0.2187	0.0034	0.0155	0.0506	0.0043	0.0853	0.0576	0.001	0.0173	0.0398	0.002	0.0514	BG
maker-0_D_3L-augustus-gene-36.154	0.0453	2.6244	57.9672	0.0001	0	0.027	0.1067	0.0044	0.0411	0.1712	0.0044	0.0256	0.0001	0	0.0119	BG
maker-4_B_2L-augustus-gene-82.107	0.1708	0.1168	0.6841	0.3615	0.0029	0.008	0.1299	0.0036	0.0274	0.1795	0.0031	0.0174	0.0001	0	0.0223	BG
maker-0_D_3L-augustus-gene-55.139	0.02	1.3181	65.8918	0.0001	0	0.0194	0.0308	0.0015	0.0487	0.0257	0.0007	0.029	0.0001	0	0.0655	BG
maker-3_A_X-augustus-gene-21.58	0.0291	0.0062	0.2128	0.279	0.0017	0.006	0.1189	0	0	0.0001	0	0.0035	0.1846	0	0	BG
maker-4_B_2L-snap-gene-85.87	0.2211	0.2693	1.2177	0.0001	0	0.0241	0.0001	0	0	0.1609	0.0031	0.0194	0.0001	0	0	BG
augustus_masked-0_D_3L-processed-gene-27.32	0.071	0.0432	0.608	0.0001	0	0.0055	0.0987	0.0017	0.0171	0.0001	0	0.012	0.0693	0.0016	0.0235	BG
maker-4_B_2L-snap-gene-56.206	0.087	0.0279	0.321	0.0001	0	0.0292	0.0001	0	0	0.0001	0	0.0129	0.0001	0	0	BG
maker-0_D_3L-augustus-gene-74.90	0.2748	1.0525	3.8295	0.2059	0.0026	0.0125	0.0001	0	0.0164	0.85	0.0017	0.002	0.0001	0	0.0217	BG
snap_masked-1_C_2R-processed-gene-32.50	23.6497	12.449	0.5264	0.4633	0	0	3.35	0.0067	0.002	0.455	0	0	3.35	0.0067	0.002	BG
maker-0_D_3L-snap-gene-70.122	0.2919	0.2164	0.7415	0.2215	0.0023	0.0105	0.0001	0	0.0053	0.0918	0.0012	0.0134	0.1685	0.0009	0.0055	BG
maker-1_C_2R-augustus-gene-15.99	0.0138	0.8136	59.053	0.2581	0	0	0.0001	0	0.036	0.0001	0	0.018	0.0001	0	0.0196	BG
maker-2_E_3R-snap-gene-92.127	0.224	0.08	0.357	0.0934	0.0022	0.0231	0.0001	0	0.0362	0.5073	0.0067	0.0132	0.1381	0.0044	0.0322	BG
maker-0_D_3L-augustus-gene-66.34	0.2023	0.0994	0.4911	0.2503	0	0	3.4324	0.0064	0.0019	0.2179	0.0034	0.0158	0.391	0.019	0.0485	BG
maker-1_C_2R-augustus-gene-43.122	0.1004	4.5696	45.4956	0.0212	0.0005	0.025	0.0494	0.0006	0.013	0.0366	0.0007	0.0201	0.0306	0.0006	0.02	BG
maker-1_C_2R-snap-gene-71.23	0.0734	0.0444	0.6043	0.0001	0	0.0394	0.0001	0	0.0279	0.0001	0	0.0509	0.0001	0	0.0451	BG
maker-4_B_2L-augustus-gene-47.120	0.4745	7.3781	15.5492	0.3929	0.0021	0.0054	0.491	0.0071	0.0145	1.5248	0.0055	0.0036	0.2292	0.0031	0.0133	BG
maker-3_A_X-augustus-gene-71.77	0.1642	0.088	0.5362	0.1818	0.0041	0.0227	0.1808	0.0036	0.0197	0.1165	0.004	0.034	0.2972	0.0071	0.024	BG
maker-1_C_2R-snap-gene-12.175	0.246	0.0704	0.2862	0.1189	0.0027	0.0227	0.5616	0.0081	0.0145	0.0001	0	0.005	2.1	0.0042	0.002	BG
maker-2_E_3R-snap-gene-90.85	0.0922	0.0337	0.3661	0.0001	0	0.0106	0.0001	0	0.0062	0.0892	0.0008	0.009	0.2297	0.0052	0.0225	BG
maker-2_E_3R-snap-gene-51.169	0.1316	0	0	0.0001	0	0.0027	0.0001	0	0.0106	0.086	0.0019	0.0223	0.7595	0.0014	0.0018	BG
augustus_masked-3_A_X-processed-gene-54.4	0.194	0.0993	0.5118	0.5889	0	0	0.0001	0	0	0.1523	0.0025	0.0166	1.2403	0	0	BG
maker-2_E_3R-augustus-gene-93.54	0.0365	1.3318	36.5044	0.0001	0	0.0042	0.0001	0	0.0463	0.2204	0.0039	0.0177	0.0245	0.0013	0.0532	BG
maker-2_E_3R-augustus-gene-14.85	0.2911	0	0	0.0001	0	0.0152	0.0001	0	0	0.0129	0.0005	0.0396	0.2368	0	0	BG
maker-4_B_2L-augustus-gene-30.93	0.0426	0.0183	0.4298	0.0001	0	0.0034	0.024	0.0013	0.0556	0.0001	0	0.0454	0.0001	0	0.0506	BG
maker-0_D_3L-augustus-gene-31.119	0.1345	1.1921	8.8612	0.2385	0.0037	0.0154	0.0498	0.0018	0.0355	1.0212	0.0049	0.0048	0.0391	0.0009	0.0218	BG
maker-2_E_3R-snap-gene-39.	0.0966	2.7252	28.2039	0.1689	0.002	0.012	0.0389	0.0017	0.0432	0.2761	0.0037	0.0134	0.0631	0.003	0.047	BG
augustus_masked-74_U_U-processed-gene-0.0	7.6545	5.1759	0.6762	0.2361	0	0	0.4099	0	0	0.1908	0	0	0.1908	0	0	BG
maker-3_A_X-augustus-gene-12.25	0.2371	0.1404	0.5922	0.247	0.0033	0.0136	0.0459	0.003	0.0654	0.1474	0.0038	0.0256	0.0415	0.0021	0.0505	BG
maker-4_B_2L-augustus-gene-23.89	0.0644	0.0169	0.2621	0.0001	0	0	0.7393	0	0	0.0001	0	0	0.6352	0	0	BG
snap_masked-2_E_3R-processed-gene-73.16	0.1041	0.0092	0.0885	0.0887	0.001	0.0118	0.0887	0.001	0.0118	0.0131	0.0022	0.1671	0.0001	0	0.0023	BG
maker-0_D_3L-snap-gene-2.75	0.0646	1.3121	20.3223	0.0001	0	0	0.0386	0.002	0.0517	0.4592	0	0	0.0001	0	0.0448	BG
maker-0_D_3L-augustus-gene-59.113	0.0792	0.8256	10.4245	0.0001	0	0	0.0001	0	0.0334	0.1277	0.0044	0.0345	0.0152	0.0011	0.0724	BG
maker-1_C_2R-augustus-gene-40.146	0.1903	0.0249	0.1307	0.1379	0.0032	0.0234	0.1588	0.0218	0.1375	1.8701	0.0031	0.0017	NA	NA	NA	BG
maker-1_C_2R-augustus-gene-18.86	0.156	7.4647	47.8436	0.449	0	0	0.0001	0	0	0.3375	0	0	0.0117	0.0003	0.0235	BG
maker-5_U_U-augustus-gene-19.62	0.0876	2.1587	24.6506	0.0001	0	0.0077	0.0001	0	0.0473	0.304	0.0032	0.0106	0.0276	0.0015	0.0548	BG
maker-3_A_X-augustus-gene-18.55	0.0587	0.0185	0.3154	0.0001	0	0	0.0001	0	0	0.0001	0	0.0085	0.0001	0	0	BG
maker-2_E_3R-augustus-gene-86.105	0.1731	0.0086	0.0499	0.0001	0	0	0.12	0.0109	0.0904	0.0001	0	0.0115	0.12	0.0109	0.0904	BG
maker-0_D_3L-augustus-gene-63.88	0.1758	0.0779	0.4431	0.0774	0.0024	0.0306	0.0001	0	0.0426	0.0945	0.0039	0.041	0.0377	0.0017	0.045	BG
maker-3_A_X-augustus-gene-41.88	0.0961	0.0049	0.0507	0.0001	0	0.0131	0.0001	0	0.0131	36.7766	0.0045	0.0001	0.0001	0	0.0093	BG
maker-2_E_3R-augustus-gene-56.98	0.0803	4.433	55.2206	0.0716	0.0012	0.0164	0.0001	0	0.0225	0.0961	0.0012	0.0122	0.0001	0	0.0228	BG
maker-1_C_2R-augustus-gene-33.113	0.0583	0.0126	0.2164	0.0599	0.0009	0.0152	0.0377	0.0008	0.0218	0.0061	0.0001	0.0147	0.0001	0	0.0112	BG
maker-2_E_3R-snap-gene-47.163	0	0	0.0198	NA	NA	NA	NA	NA	NA	NA	NA	NA	NA	NA	NA	BG
maker-4_B_2L-snap-gene-92.76	0.2213	0.0585	0.2643	0.0001	0	0.015	0.0001	0	0.0098	0.0001	0	0.013	0.0001	0	0.0127	BG
maker-2_E_3R-snap-gene-59.202	0.0578	0.0287	0.4958	0.0001	0	0.0147	0.0752	0.0008	0.0101	0.0001	0	0.0384	0.0001	0	0.0036	BG
maker-5_U_U-snap-gene-17.20	0.0371	0.0349	0.9408	0.0001	0	0.0018	0.1058	0.0013	0.0122	0.0001	0	0.0082	0.0406	0.0006	0.0138	BG
maker-0_D_3L-augustus-gene-38.138	0.0196	0.0138	0.7062	0.7	0.0014	0.002	0.0001	0	0.006	0.0001	0	0.0055	0.4316	0	0	BG
maker-2_E_3R-augustus-gene-27.104	0.2235	9.0072	40.3071	0.1262	0.0036	0.0287	2.0604	0	0	0.3817	0.0073	0.0191	1.114	0	0	BG
maker-3_A_X-snap-gene-50.75	0.0269	1.2187	45.2648	0.0001	0	0.0088	0.0167	0.0006	0.0343	0.0526	0.0006	0.0109	0.0001	0	0.0156	BG
maker-1_C_2R-augustus-gene-44.152	0.0378	0.0017	0.0445	0.0001	0	0.0048	0.0001	0	0.0372	0.0001	0	0.0049	0.0001	0	0.0372	BG
maker-3_A_X-augustus-gene-56.97	0.0032	0.0009	0.2738	0.0001	0	0.0065	0.0001	0	0.0207	0.0001	0	0.0266	0.0001	0	0.0154	BG
maker-0_D_3L-augustus-gene-51.167	0.069	1.1529	16.7099	0.0001	0	0.0131	1.5346	0	0	0.0001	0	0.0057	0.5523	0	0	BG
augustus_masked-2_E_3R-processed-gene-88.8	0.0542	0.0133	0.2452	0.1146	0.0025	0.0217	0.0359	0.0004	0.0114	0.0001	0	0.0161	0.0548	0.0005	0.0095	BG
maker-1_C_2R-augustus-gene-24.142	0.0052	0.002	0.3817	0.0001	0	0.0203	0.0001	0	0.0185	0.0001	0	0.0232	0.0001	0	0.0266	BG
maker-0_D_3L-augustus-gene-76.95	0.0584	3.2378	55.483	0.0001	0	0.0134	0.0242	0.0006	0.0232	0.0308	0.0006	0.0182	0.0108	0.0005	0.0489	BG
maker-2_E_3R-snap-gene-90.89	0.0625	1.5744	25.1966	0.0482	0.0004	0.0079	0.0509	0.0012	0.0233	0.0001	0	0.0148	0.0606	0.0008	0.0131	BG
maker-0_D_3L-augustus-gene-38.152	0.0619	0.0266	0.43	0.0001	0	0.0029	0.0661	0.0016	0.0236	0.0501	0.001	0.0209	0.1322	0.0016	0.0121	BG
maker-4_B_2L-augustus-gene-35.76	0.1347	0.0452	0.3353	0.2487	0	0	0.0001	0	0.0096	0.0001	0	0.0118	0.0001	0	0.0431	BG
maker-3_A_X-augustus-gene-95.66	0.2608	0.2617	1.0032	0.1797	0.0044	0.0244	0.4298	0	0	0.1535	0.0021	0.0138	0.4244	0	0	BG
maker-0_D_3L-augustus-gene-55.132	0.3056	0.1179	0.3859	0.0001	0	0.0121	0.0001	0	0.0313	0.1636	0.003	0.0185	0.0001	0	0.0196	BG
maker-1_C_2R-augustus-gene-17.107	0.0862	0.0318	0.3689	0.12	0.002	0.0167	0.0001	0	0	0.0001	0	0.0112	0.0001	0	0	BG
maker-0_D_3L-snap-gene-58.74	0.0935	1.5428	16.4977	0.0803	0.003	0.037	0.0466	0.0018	0.0379	0.058	0.0024	0.041	0.0135	0.0006	0.0423	BG
maker-2_E_3R-augustus-gene-57.153	0.0282	0.0101	0.3585	0.047	0.0008	0.016	0.0001	0	0.0113	0.0001	0	0.0471	0.0226	0.0009	0.0416	BG
maker-2_E_3R-snap-gene-41.94	0.1418	0.0082	0.0582	0.0703	0.0008	0.012	0.0001	0	0.012	0.0001	0	0.0029	0.0001	0	0.0029	BG
maker-2_E_3R-augustus-gene-12.49	0.0233	0.0176	0.7539	0.0001	0	0.0145	0.0001	0	0.0423	0.0001	0	0.022	0.0351	0.0015	0.0414	BG
maker-0_D_3L-augustus-gene-18.169	0.147	0.109	0.7413	0.0001	0	0.0306	0.0705	0.0017	0.0242	0.0752	0.0017	0.0229	0.0477	0.0017	0.0358	BG
maker-4_B_2L-snap-gene-60.89	0.0364	0.0067	0.1834	0.0001	0	0.017	0.0001	0	0	0.0001	0	0.0068	0.0001	0	0	BG
maker-3_A_X-augustus-gene-90.34	0.0291	1.4773	50.7277	0.0001	0	0.0157	0.1327	0.0019	0.0142	0.0001	0	0.0098	0.0001	0	0.0576	BG
maker-0_D_3L-augustus-gene-26.9	0.0349	0.9985	28.5844	0.0001	0	0.005	0.0595	0.0026	0.0435	0.0001	0	0	0.0001	0	0.0214	BG
maker-0_D_3L-snap-gene-84.132	0.0357	0.0094	0.2632	0.1676	0.0007	0.0039	0.0001	0	0.003	0.0001	0	0.0075	0.0001	0	0.0177	BG
maker-1_C_2R-augustus-gene-62.9	0.0879	3.5264	40.1218	0.0001	0	0.0343	0.0052	0.0001	0.0211	0.0001	0	0.0151	0.0001	0	0.0192	BG
maker-1_C_2R-augustus-gene-7.9	0.061	0.0007	0.0116	0.0001	0	0.0088	0.1241	0.003	0.0239	0.3107	0	0	0.2424	0.0029	0.0118	BG
snap_masked-2_E_3R-processed-gene-48.82	0.1244	0.0623	0.5007	0.0001	0	0.0026	0.0001	0	0.0124	0.0379	0.0006	0.0151	0.051	0.0006	0.0122	BG
maker-1_C_2R-augustus-gene-84.117	0.0328	1.7193	52.377	0.0317	0.0007	0.0231	0.0377	0.0015	0.0387	0.0172	0.0004	0.0212	0.0001	0	0.0193	BG
maker-0_D_3L-snap-gene-27.187	0.0669	0.0329	0.4923	0.058	0.0007	0.0128	0.0001	0	0.0208	0.0001	0	0.0101	0.0229	0.0006	0.0279	BG
maker-2_E_3R-augustus-gene-86.132	0	0	0.0004	NA	NA	NA	2.5745	0	0	0.9788	0	0	NA	NA	NA	BG
maker-3_A_X-snap-gene-93.57	0.0185	1.1094	60.1092	0.0001	0	0.0171	0.0001	0	0	0.0001	0	0.0136	0.0001	0	0	BG
maker-3_A_X-augustus-gene-45.88	0.5583	0.4035	0.7228	0.1653	0.0038	0.0231	0.0411	0.0009	0.0229	0.1308	0.0022	0.0171	0.0001	0	0.0057	BG
maker-1_C_2R-augustus-gene-20.157	0.0547	0.0266	0.485	0.024	0.0003	0.0129	0.0692	0.002	0.0288	0.0001	0	0.0132	0.0001	0	0.0234	BG
augustus_masked-1_C_2R-processed-gene-4.0	0.0815	0.1026	1.2585	0.0001	0	0.0211	0.0001	0	0	0.0001	0	0.0155	0.0001	0	0	BG
maker-2_E_3R-augustus-gene-17.109	0.2273	0.0792	0.3482	0.2352	0.0006	0.0027	0.2711	0.0015	0.0055	0.4804	0.0006	0.0012	0.1401	0.0015	0.0106	BG
maker-1_C_2R-augustus-gene-38.	0.0918	0.0387	0.4214	0.0993	0.0036	0.0366	0.0606	0.0039	0.0637	0.0513	0.0017	0.0323	0.0649	0.003	0.0469	BG
maker-2_E_3R-augustus-gene-63.135	0.16	0.1143	0.7145	0.0001	0	0.0135	0.0001	0	0	0.0001	0	0.0131	0.0001	0	0	BG
maker-1_C_2R-augustus-gene-32.68	0.0293	1.8112	61.8786	0.0379	0.0005	0.0128	0.0144	0.001	0.0682	0.0182	0.0005	0.0267	0.0001	0	0.0327	BG
maker-3_A_X-augustus-gene-78.100	0.0044	0.0013	0.3029	0.4529	0	0	0.2946	0	0	0.0001	0	0.0129	0.0001	0	0.0197	BG
augustus_masked-2_E_3R-processed-gene-12.15	0.2269	0.1912	0.8425	0.5859	0.0024	0.0042	0.1551	0.0033	0.0215	0.1584	0.0033	0.021	0.6023	0.0112	0.0186	BG
maker-5_U_U-augustus-gene-18.26	0.0052	0.0022	0.4266	0.0001	0	0.0126	0.0001	0	0.0051	0.3578	0	0	0.0001	0	0.0035	BG
maker-1_C_2R-augustus-gene-33.120	0.1168	0	0	0.0946	0.0013	0.0136	0.0333	0.005	0.1489	0.3465	0.0036	0.0103	0.0333	0.005	0.1489	BG
augustus_masked-1_C_2R-processed-gene-40.9	0.1819	0	0	0.0001	0	0	0.0001	0	0.0153	0.0001	0	0.0038	0.0001	0	0.0158	BG
snap_masked-0_D_3L-processed-gene-18.64	0.0113	0.7118	62.9053	0.0001	0	0	0.0001	0	0.0534	0.0001	0	0.0156	0.0395	0.0016	0.0404	BG
maker-1_C_2R-augustus-gene-24.14	0.046	0	0	0.0001	0	0.0043	0.5572	0.0016	0.0028	0.0001	0	0.0088	0.0001	0	0.0094	BG
maker-3_A_X-augustus-gene-23.106	0.2648	0.1322	0.4994	0.0001	0	0.0074	0.0001	0	0	0.2145	0.0016	0.0075	0.0001	0	0	BG
maker-3_A_X-snap-gene-33.166	0.044	0.02	0.4531	0.0001	0	0.0225	0.0717	0.0017	0.0231	0.0139	0.0003	0.0242	0.0162	0.0003	0.0199	BG
maker-3_A_X-snap-gene-41.96	0.0154	0.9836	64.0471	0.0001	0	0.0108	0.0001	0	0.0283	0.0001	0	0.0261	0.0001	0	0.0182	BG
maker-2_E_3R-augustus-gene-81.139	0.0767	1.7092	22.2867	0.0001	0	0.0092	0.0915	0.0021	0.0224	0.9223	0.0034	0.0036	0.1674	0.0042	0.025	BG
maker-0_D_3L-augustus-gene-75.110	0.056	2.9979	53.5068	0.097	0.0016	0.0167	0.0001	0	0.0181	0.0001	0	0.0167	0.0001	0	0.0066	BG
maker-0_D_3L-augustus-gene-37.156	0.1435	0.0446	0.3105	0.3078	0.0039	0.0127	0.0001	0	0	0.0001	0	0.0298	0.0001	0	0	BG
maker-2_E_3R-augustus-gene-73.66	0.0367	2.2492	61.3262	0.0556	0.0008	0.0142	0.0252	0.0008	0.0313	0.0001	0	0.0081	0.0254	0.0008	0.0311	BG
maker-1_C_2R-augustus-gene-65.100	0.1138	5.1388	45.1419	0.0401	0.0012	0.0299	0.1742	0.0032	0.0184	0.0001	0	0.0253	0.0703	0.0016	0.023	BG
maker-3_A_X-augustus-gene-123.25	0.1838	0.1495	0.8133	0.0001	0	0.0072	0.0001	0	0	2.5	0.005	0.002	0.55	0.0011	0.002	BG
maker-0_D_3L-augustus-gene-5.87	0.0561	0.037	0.6586	0.0739	0.0011	0.0148	0.0001	0	0.011	0.0564	0.0022	0.0388	0.0001	0	0.0183	BG
maker-2_E_3R-augustus-gene-97.80	0.4696	0.31	0.6601	0.2543	0.0055	0.0215	0.0001	0	0	0.0908	0.0019	0.021	0.0001	0	0	BG
maker-2_E_3R-augustus-gene-38.132	0.5361	0.5511	1.0278	0.5012	0.0078	0.0156	0.0304	0.0015	0.0506	0.1542	0	0	0.0001	0	0.0248	BG
maker-2_E_3R-augustus-gene-81.130	0.0731	1.822	24.9283	0.0001	0	0.0158	0.076	0.004	0.0522	0.0001	0	0.0047	0.0695	0.0028	0.0398	BG
maker-0_D_3L-augustus-gene-11.104	0	0	0.0862	0.4186	0	0	0.1233	0	0	NA	NA	NA	0.1578	0	0	BG
maker-6_F_4-augustus-gene-2.72	0.1915	0.1606	0.8386	0.6301	0.0015	0.0023	0.3151	0.0029	0.0091	0.1883	0.0016	0.0085	0.1701	0.0015	0.0085	BG
augustus_masked-1_C_2R-processed-gene-48.17	0.1187	0.0605	0.5091	0.0001	0	0.0143	0.0001	0	0.0152	0.0001	0	0.0113	0.0247	0.001	0.0394	BG
maker-1_C_2R-augustus-gene-61.114	0.1482	0.018	0.1217	1.35	0.0027	0.002	0.0001	0	0.0316	0.0001	0	0	0.0001	0	0.0102	BG
augustus_masked-1_C_2R-processed-gene-26.8	0.4878	0.265	0.5432	0.2561	0.0031	0.0121	0.2832	0.2785	0.9833	0.0852	0.0008	0.0088	1.616	0.0676	0.0418	BG
snap_masked-2_E_3R-processed-gene-102.14	0.4117	0.1211	0.2942	0.0001	0	0.0068	0.0001	0	0.007	0.73	0	0	0.0001	0	0.0034	BG
maker-2_E_3R-augustus-gene-92.84	0.0425	0.0202	0.4757	0.0001	0	0.009	0.0202	0.0016	0.079	0.0001	0	0.0249	0.0001	0	0.0548	BG
maker-1_C_2R-augustus-gene-64.86	0.1183	0.0076	0.0645	0.0001	0	0.0141	0.0001	0	0.0141	0.0001	0	0	0.0001	0	0.0448	BG
maker-1_C_2R-augustus-gene-52.78	0.0901	2.0264	22.5025	0.0001	0	0.0077	0.0758	0.0025	0.033	0.0373	0.0014	0.0382	0.0894	0.0031	0.0344	BG
maker-1_C_2R-snap-gene-65.13	0.1208	0.0603	0.4992	0.3331	0	0	0.2697	0	0	0.4634	0	0	0.0001	0	0	BG
maker-0_D_3L-augustus-gene-1.65	0.1144	0.0493	0.4312	0.1663	0.0016	0.0099	0.0001	0	0.0154	0.311	0.0016	0.0051	0.0001	0	0.0049	BG
maker-3_A_X-augustus-gene-23.93	0.2233	0.207	0.927	0.5299	0.0061	0.0115	0.0001	0	0	0.4582	0.0119	0.0261	0.0957	0	0	BG
maker-2_E_3R-augustus-gene-16.140	0.0011	0.0004	0.3565	0.0001	0	0.0288	0.0001	0	0.0558	0.0001	0	0.0462	0.0001	0	0.0403	BG
maker-2_E_3R-augustus-gene-99.110	0.0365	0.0075	0.2053	0.2024	0.002	0.01	0.5	0.001	0.002	0.9	0.0018	0.002	0.5	0.001	0.002	BG
maker-2_E_3R-augustus-gene-87.9	0.0385	2.4824	64.458	0.0001	0	0	0.0001	0	0.0193	0.0001	0	0	0.0001	0	0	BG
maker-3_A_X-augustus-gene-30.73	0.0164	0.0057	0.3491	0.3244	0	0	0.2324	0	0	0.0001	0	0.0105	0.0001	0	0	BG
maker-3_A_X-augustus-gene-28.94	0.1046	0.0058	0.055	0.1909	0.0019	0.0098	0.1909	0.0019	0.0098	0.162	0.0105	0.0647	0.0001	0	0.0127	BG
maker-0_D_3L-snap-gene-56.104	0.1883	0.0896	0.4756	0.0817	0.0013	0.0154	0.1626	0.0027	0.0167	0.3473	0.0024	0.007	0.2414	0.0095	0.0392	BG
maker-3_A_X-augustus-gene-66.58	0.1526	2.1455	14.0586	0.0953	0.0013	0.0135	0.0001	0	0.0009	0.1238	0.0012	0.0094	0.1848	0.0004	0.0019	BG
maker-2_E_3R-augustus-gene-34.98	0.129	0.0566	0.4384	0.124	0.0011	0.0091	0.0651	0.0023	0.0353	0.0001	0	0.0348	0.0001	0	0.0035	BG
maker-1_C_2R-augustus-gene-5.115	0.7579	2.1827	2.8799	1.55	0.0031	0.002	1.0027	0	0	1.26	0.0084	0.0067	0.741	0	0	BG
maker-2_E_3R-snap-gene-107.138	0.1568	0.1228	0.7833	0.3753	0.0024	0.0064	0.0931	0.0055	0.059	0.1622	0.0024	0.0147	0.0687	0.0019	0.0272	BG
maker-3_A_X-augustus-gene-55.82	0.0585	1.9721	33.7328	1.15	0.0023	0.002	0.0001	0	0.0066	0.3731	0.0023	0.0062	0.0001	0	0.0129	BG
maker-2_E_3R-augustus-gene-81.148	0.0277	0.0077	0.278	0.031	0.0005	0.0148	0.0001	0	0.0282	0.0001	0	0.0118	0.0001	0	0.027	BG
maker-1_C_2R-snap-gene-60.172	0.2105	0.0322	0.1529	0.0434	0.0062	0.142	0.0001	0	0	0.2195	0.292	1.3302	0.0001	0	0	BG
maker-2_E_3R-augustus-gene-38.122	0.0391	2.2815	58.4062	0.0541	0.0015	0.0274	0.0676	0.0017	0.0256	0.0001	0	0.0269	0.0001	0	0.0466	BG
maker-0_D_3L-augustus-gene-17.116	0.0419	1.7645	42.1358	0.0001	0	0.009	0.0001	0	0.0153	0.0001	0	0.0092	0.0001	0	0.0185	BG
snap_masked-1_C_2R-processed-gene-21.30	0.065	0.019	0.2915	0.0374	0.0003	0.0088	0.0697	0.0023	0.0325	0.0455	0.0007	0.0159	0.048	0.0018	0.0365	BG
maker-3_A_X-augustus-gene-44.110	0.0173	1.103	63.8396	0.0001	0	0.0775	0.0001	0	0	0.1242	0.6414	5.164	0.0001	0	0.0266	BG
maker-1_C_2R-augustus-gene-74.105	0.0177	1.2002	67.9966	0.0001	0	0.0082	0.0001	0	0.0421	0.0001	0	0.0225	0.0001	0	0.0334	BG
maker-1_C_2R-augustus-gene-77.115	0.0069	0.0024	0.3399	0.4321	0	0	0.0001	0	0.0404	0.3182	0	0	0.0001	0	0.0527	BG
maker-2_E_3R-augustus-gene-37.103	0.1287	0.1209	0.9396	0.0794	0.0037	0.0466	0.053	0.0011	0.0216	0.0378	0.0012	0.0308	0.0001	0	0.0568	BG
maker-4_B_2L-augustus-gene-95.9	0.1611	0.1081	0.6709	0.0253	0.0006	0.0254	0.0929	0.0012	0.013	0.1013	0.0019	0.0191	0.0423	0.0007	0.0162	BG
maker-2_E_3R-snap-gene-22.19	0.2578	0.058	0.2252	0.1108	0.0013	0.0119	0.1881	0.0017	0.0089	0.3188	0.0029	0.0092	0.0709	0.0005	0.0069	BG
maker-3_A_X-augustus-gene-70.10	0.0471	0.3359	7.1397	0.0001	0	0.0254	0.0001	0	0.0051	0.0001	0	0.0294	0.0001	0	0.0052	BG
maker-1_C_2R-augustus-gene-20.122	0.0454	0.0257	0.5658	0.0001	0	0.0129	0.0001	0	0	0.0001	0	0.0073	0.0001	0	0	BG
augustus_masked-0_D_3L-processed-gene-18.54	0.0045	0.2804	61.6423	0.3485	0	0	0.2142	0	0	0.225	0	0	0.2747	0	0	BG
maker-4_B_2L-augustus-gene-6.48	0.2105	0.1183	0.5621	0.0001	0	0.0117	0.0001	0	0.025	0.0001	0	0.0027	0.0517	0.0009	0.0178	BG
maker-1_C_2R-augustus-gene-12.143	0.1495	0.0672	0.4496	0.1509	0.0017	0.0116	0.1459	0.0087	0.0594	0.0885	0.0019	0.0214	0.2279	0.007	0.0308	BG
maker-4_B_2L-augustus-gene-73.84	0.0869	1.8664	21.4733	0.3299	0	0	0.0184	0.0011	0.0592	0.0973	0.0012	0.012	0.0349	0.0012	0.0341	BG
maker-1_C_2R-augustus-gene-4.66	0.182	1.9459	10.6901	0.134	0.0008	0.0058	0.0001	0	0	0.0001	0	0.0086	0.0001	0	0	BG
maker-1_C_2R-augustus-gene-75.	0.0957	0.0209	0.2186	0.557	0	0	0.0001	0	0.0256	0.7309	0	0	0.0355	0.0023	0.066	BG
maker-0_D_3L-augustus-gene-33.110	0.1099	0.0271	0.2467	0.0001	0	0.0234	0.0001	0	0	0.0001	0	0	0.0001	0	0	BG
maker-1_C_2R-augustus-gene-5.12	0.1051	0.0387	0.3682	0.0001	0	0.0309	0.0001	0	0	0.0001	0	0.0287	0.0001	0	0	BG
augustus_masked-2_E_3R-processed-gene-5.0	0.1743	0.1096	0.6287	0.0824	0.0017	0.0202	0.0452	0.0012	0.0261	0.0946	0.0031	0.0331	0.1906	0.0087	0.0455	BG
maker-2_E_3R-augustus-gene-63.14	0.1393	1.4479	10.3946	0.0001	0	0.008	0.1568	0.0014	0.0088	0.1011	0.0014	0.0138	0.2202	0.003	0.0137	BG
maker-0_D_3L-snap-gene-54.126	0.0157	0.9673	61.4466	0.0001	0	0.0099	0.0001	0	0.0107	0.0001	0	0.0139	0.0001	0	0.0114	BG
maker-3_A_X-augustus-gene-54.44	1.5535	5.896	3.7952	0.1123	0.0035	0.0313	0.0001	0	0	0.0001	0	0.0239	0.0001	0	0	BG
maker-1_C_2R-augustus-gene-82.88	0.4038	12.3734	30.6404	0.3013	0	0	0.0975	0	0	0.0001	0	0.0087	0.1801	0.008	0.0447	BG
maker-3_A_X-snap-gene-27.102	0.0145	0.0002	0.0146	0.0001	0	0.0077	0.0001	0	0	0.3439	0.0013	0.0036	0.0001	0	0	BG
maker-0_D_3L-augustus-gene-2.62	0.0183	1.0821	59.2414	0.0001	0	0.0362	0.0001	0	0.0138	0.0001	0	0.0356	0.0001	0	0.0182	BG
maker-1_C_2R-augustus-gene-40.130	0.0076	0.4919	64.5212	0.0001	0	0.0085	0.0001	0	0.0069	0.0001	0	0	0.0001	0	0.0073	BG
maker-1_C_2R-augustus-gene-67.118	0.0892	0.0246	0.2756	0.0835	0.001	0.0122	0.1492	0.0083	0.0555	0.0947	0.0031	0.0325	0.0382	0.0021	0.0544	BG
maker-0_D_3L-augustus-gene-5.83	0.2035	8.0086	39.3535	0.0001	0	0.007	0.0001	0	0.0596	0.0001	0	0.0247	0.0001	0	0.0568	BG
maker-1_C_2R-augustus-gene-32.70	0.0318	1.7825	56.0378	0.0001	0	0.0217	0.0001	0	0.0172	0.1127	0.0014	0.0126	0.0001	0	0.022	BG
maker-3_A_X-augustus-gene-82.59	0.2783	1.1319	4.0672	0.4903	0.0017	0.0035	0.3313	0.0013	0.004	0.1627	0.0013	0.008	2.1862	0	0	BG
maker-4_B_2L-augustus-gene-49.120	0.1907	0.0677	0.3549	0.0001	0	0.0107	0.4709	0	0	0.0001	0	0.0179	0.0001	0	0	BG
maker-0_D_3L-augustus-gene-18.17	0.1096	0.0599	0.5464	0.2883	0.0023	0.008	0.3492	0	0	1.15	0.0023	0.002	0.3677	0	0	BG
maker-0_D_3L-snap-gene-15.228	0.0696	0.0302	0.4337	0.0546	0.0005	0.0099	0.1063	0.0012	0.0113	0.0885	0.0012	0.0133	0.324	0.0014	0.0045	BG
maker-4_B_2L-snap-gene-48.133	0.2139	0.1362	0.6368	0.1132	0.0016	0.0142	0.0001	0	0.0155	0.2232	0.0032	0.0144	0.0001	0	0.0045	BG
maker-0_D_3L-augustus-gene-6.67	0.0586	0.0177	0.3028	0.0001	0	0.0088	0.0124	0.0003	0.0233	0.0001	0	0.0145	0.0001	0	0.0178	BG
maker-2_E_3R-snap-gene-76.113	0.0283	0.0006	0.0195	0.0001	0	0.0057	0.0001	0	0.0036	0.1158	0.0019	0.0166	0.0001	0	0.0175	BG
maker-2_E_3R-snap-gene-96.63	0.0555	0.0069	0.1247	0.0001	0	0	0.0001	0	0	0.3276	0	0	0.0001	0	0	BG
maker-3_A_X-snap-gene-3.114	0.5214	0.6725	1.2899	0.4577	0	0	0.0001	0	0.0203	0.4143	0	0	5.4625	0	0	BG
maker-0_D_3L-augustus-gene-34.107	0.4391	0.94	2.1409	0.0001	0	0.0111	0.4104	0.0047	0.0115	0.0788	0	0	0.1462	0.0024	0.0163	BG
maker-1_C_2R-snap-gene-5.153	0.2717	0.0457	0.1682	0.0886	0.0025	0.0286	0.0001	0	0	0.063	0.0013	0.0201	0.0001	0	0	BG
snap_masked-3_A_X-processed-gene-49.18	0.0452	0.0253	0.5601	0.0257	0.0005	0.0184	0.0672	0.0015	0.0224	0.0001	0	0.0103	0.0242	0.0006	0.026	BG
maker-2_E_3R-snap-gene-19.107	0.1886	0.0648	0.3437	0.1579	0.002	0.0129	0.0735	0.0015	0.0198	0.0001	0	0.0269	0.0001	0	0.0256	BG
maker-3_A_X-augustus-gene-92.52	0.009	0.5462	60.8305	0.0001	0	0.0511	0.0001	0	0	0.0001	0	0.0187	0.0001	0	0	BG
maker-0_D_3L-augustus-gene-75.115	0.1625	0.0656	0.4036	0.0001	0	0.0176	0.2127	0.0028	0.013	1.4673	0.0121	0.0083	0.1595	0.0042	0.0261	BG
snap_masked-4_B_2L-processed-gene-67.76	0.1813	0.0768	0.4237	0.149	0.0037	0.0249	0.1519	0.0037	0.0243	0.218	0.0046	0.0211	0.1624	0.006	0.037	BG
maker-1_C_2R-augustus-gene-19.132	0.3543	0.2581	0.7287	3.2	0.0064	0.002	0.0001	0	0.0044	0.0001	0	0.0216	1.6	0.0032	0.002	BG
maker-3_A_X-snap-gene-46.117	0.042	2.2257	52.984	0.0288	0.0005	0.016	0.0158	0.0005	0.0337	0.0384	0.0005	0.0134	0.1113	0.0019	0.0167	BG
maker-1_C_2R-snap-gene-66.126	0.0165	1.0125	61.2353	0.4474	0	0	0.0001	0	0	0.3034	0	0	0.0001	0	0.0082	BG
maker-4_B_2L-augustus-gene-97.49	0.484	0.4596	0.9495	0.55	0.0011	0.002	0.3314	0.0022	0.0067	0.1643	0.004	0.0245	0.2	0.0014	0.0072	BG
maker-3_A_X-augustus-gene-13.70	0.0401	0.0229	0.5716	0.0001	0	0.0307	0.0222	0.0006	0.0291	0.0373	0.0012	0.0322	0.0001	0	0.0373	BG
maker-4_B_2L-augustus-gene-20.98	0.0541	0.0319	0.5903	NA	NA	NA	0.0001	0	0	0.0001	0	0.0275	0.0001	0	0	BG
maker-1_C_2R-augustus-gene-59.85	0.0929	2.1004	22.6186	0.0001	0	0.0061	0.0001	0	0	0.0001	0	0.0273	0.0001	0	0	BG
maker-4_B_2L-augustus-gene-61.77	0.0301	0.0117	0.3874	0.0001	0	0.0374	0.0001	0	0	0.0001	0	0.0213	0.0001	0	0	BG
maker-0_D_3L-augustus-gene-27.128	0.1927	0.0609	0.3163	0.0506	0.0011	0.0211	0.0494	0.0011	0.0225	1.05	0.0021	0.002	0.0817	0.0022	0.0273	BG
maker-2_E_3R-augustus-gene-82.125	0.0674	0.0355	0.527	0.0001	0	0.0135	0.0001	0	0.027	0.0001	0	0	0.0001	0	0.0329	BG
maker-0_D_3L-augustus-gene-9.68	0.1047	0.0284	0.271	0.3303	0.0008	0.0025	0.0955	0.0016	0.0172	0.064	0.0012	0.0186	0.1579	0.0016	0.0103	BG
maker-2_E_3R-augustus-gene-86.140	0.6348	0.6565	1.0343	0.0001	0	0.0085	0.4515	0.0159	0.0353	0.0001	0	0.0085	0.0001	0	0.0085	BG
maker-3_A_X-augustus-gene-8.78	0.4281	0.0206	0.048	0.2308	0.0017	0.0074	0.1349	0.0315	0.2332	0.0001	0	0.0039	0.1349	0.0315	0.2332	BG
maker-3_A_X-augustus-gene-92.54	0.2869	0.1722	0.6003	0.0001	0	0.0072	0.393	0	0	0.0001	0	0	0.3143	0	0	BG
snap_masked-1_C_2R-processed-gene-71.8	0.092	0.0495	0.5385	0.0489	0.0008	0.0167	2.0561	0.0068	0.0033	0.0291	0.0008	0.029	0.0001	0	0	BG
maker-2_E_3R-augustus-gene-68.95	0.0796	0.0494	0.621	0.0473	0.0015	0.0318	0.0266	0.0014	0.0544	0.0102	0.0003	0.029	0.0373	0.0018	0.0481	BG
maker-3_A_X-snap-gene-44.148	0.0346	0.829	23.9577	0.0001	0	0.0165	0.1241	0.0052	0.0415	0.0001	0	0.0247	0.0001	0	0.0089	BG
maker-0_D_3L-augustus-gene-35.136	0.0128	0.7869	61.36	0.0723	0.0018	0.0252	0.0001	0	0.0357	0.0001	0	0.0228	0.0001	0	0.0364	BG
maker-2_E_3R-augustus-gene-24.12	0.0625	0.0559	0.8942	0.1971	0	0	0.098	0.0012	0.0119	0.1535	0	0	0.3218	0.0033	0.0102	BG
maker-1_C_2R-augustus-gene-7.80	0.9488	0.117	0.1233	3.069	0.0035	0.0011	0.0001	0	0.0046	0.2868	0.0045	0.0157	0.0001	0	0	BG
maker-1_C_2R-augustus-gene-67.102	0.1772	0.114	0.6438	1	0.002	0.002	0.5478	0.002	0.0036	0.2422	0.003	0.0123	0.0001	0	0.0029	BG
augustus_masked-0_D_3L-processed-gene-15.3	0.0615	0.0376	0.612	0.3996	0.0036	0.0091	0.0001	0	0	0.4172	0.0037	0.009	0.0001	0	0.0181	BG
maker-0_D_3L-augustus-gene-72.90	0.1603	0.0824	0.5138	0.1481	0.0005	0.0036	0.1784	0.0059	0.0331	0.0203	0.0002	0.0106	0.0429	0.0019	0.0444	BG
maker-0_D_3L-snap-gene-84.126	0.2997	0.0357	0.1193	0.0001	0	0	0.1852	0	0	0.2966	0.0155	0.0522	0.1972	0	0	BG
maker-0_D_3L-augustus-gene-33.12	0.1238	0.0277	0.2239	0.0001	0	0.0087	0.0076	0.0002	0.0224	0.0001	0	0.0161	0.0156	0.0002	0.0144	BG
maker-3_A_X-augustus-gene-44.114	0.0839	0.0588	0.7011	0.0001	0	0.0209	0.0992	0.0005	0.0047	0.0001	0	0.0244	0.1701	0.0054	0.0318	BG
augustus_masked-0_D_3L-processed-gene-17.26	0.1019	0.4121	4.0444	0.0104	0.0004	0.0398	0.0182	0.0011	0.0625	0.1442	0.0095	0.0659	0.0001	0	0.0914	BG
maker-1_C_2R-snap-gene-72.113	0.6562	0.3591	0.5473	0.4551	0.0043	0.0093	1.6489	0.0076	0.0046	1.0239	0.0068	0.0066	2.4906	0.0138	0.0055	BG
augustus_masked-4_B_2L-processed-gene-24.18	0.0333	0.7622	22.8861	0.0001	0	0.0332	0.0001	0	0.0235	0.0001	0	0.0241	0.0001	0	0.0188	BG
maker-2_E_3R-augustus-gene-95.65	0.0317	1.7956	56.6181	0.0001	0	0.0063	0.0001	0	0	0.0001	0	0.003	0.0001	0	0.0061	BG
maker-1_C_2R-augustus-gene-17.115	0.006	0.0009	0.1507	0.3791	0	0	0.0001	0	0.0142	0.0001	0	0.0074	0.0001	0	0.0234	BG
augustus_masked-1_C_2R-processed-gene-59.2	0.0602	0.0207	0.3438	0.0001	0	0.0084	0.0001	0	0	0.0329	0.0011	0.0341	0.0001	0	0	BG
maker-2_E_3R-snap-gene-74.175	0.1286	0.0538	0.4181	0.0348	0.0007	0.0212	0.1099	0.0036	0.0327	0.0523	0.002	0.0382	0.0943	0.0037	0.0393	BG
maker-0_D_3L-augustus-gene-84.97	0.0983	2.22	22.573	0.3313	0	0	0.1166	0.0014	0.012	0.3376	0	0	0.0001	0	0.0396	BG
maker-2_E_3R-augustus-gene-51.142	0.1717	0.2052	1.1948	0.2473	0.0024	0.0095	0.0953	0.0027	0.028	0.0592	0.0011	0.0187	0.074	0.0045	0.0608	BG
maker-2_E_3R-augustus-gene-105.9	0.045	0.0274	0.6089	0.0001	0	0.0256	0.0001	0	0.012	0.0001	0	0.0113	0.093	0.0008	0.0091	BG
augustus_masked-1_C_2R-processed-gene-64.2	0.0664	0.0344	0.5184	0.0001	0	0.0076	0.018	0.0006	0.0309	0.0665	0.0015	0.0232	0.0162	0.0006	0.0355	BG
maker-1_C_2R-augustus-gene-25.95	0.0098	0.6973	71.4808	0.0001	0	0.0048	0.0001	0	0	0.0001	0	0.0267	0.0001	0	0	BG
maker-3_A_X-augustus-gene-2.123	0.1654	0.1081	0.6536	1.6	0.0032	0.002	0.1445	0.0014	0.0097	1.55	0.0031	0.002	0.0932	0.0028	0.0302	BG
maker-3_A_X-augustus-gene-59.114	0.0594	0.0302	0.5086	0.0223	0.0008	0.0357	0.017	0.0008	0.0461	0.0001	0	0.0268	0.0344	0.0016	0.0456	BG
maker-3_A_X-snap-gene-67.66	0.0572	0.0175	0.3069	0.0565	0.0008	0.0144	0.0205	0.0007	0.0318	0.0566	0.0004	0.0068	0.0143	0.0004	0.0247	BG
maker-4_B_2L-augustus-gene-81.86	0.0811	0.0221	0.2724	0.0001	0	0.0076	0.0001	0	0.0054	0.0001	0	0.0079	0.0001	0	0.0053	BG
maker-1_C_2R-augustus-gene-17.12	0.2312	0.1869	0.8084	2.1	0.0042	0.002	0.4388	0	0	0.5463	0	0	0.254	0	0	BG
maker-3_A_X-snap-gene-25.115	0.1295	0.065	0.5023	0.3163	0.0036	0.0113	0.0469	0.0004	0.0079	0.1379	0.0015	0.0107	0.068	0.0004	0.0053	BG
maker-1_C_2R-snap-gene-71.215	0.4974	0.1826	0.3672	0.0001	0	0.0303	0.0001	0	0.0539	0.0001	0	0.0303	0.0921	0.0063	0.0688	BG
snap_masked-2_E_3R-processed-gene-83.30	0.0915	0.0311	0.3403	0.091	0.0005	0.0052	0.0841	0.0011	0.013	0.0271	0.0005	0.0173	0.0001	0	0.0136	BG
augustus_masked-3_A_X-processed-gene-97.22	0.0138	0.7477	54.2028	0.5031	0	0	0.0001	0	0.0051	0.1703	0.0011	0.0063	0.5727	0	0	BG
maker-2_E_3R-snap-gene-65.103	0.1904	0.0658	0.3457	0.2089	0.0039	0.0188	0.0707	0.0013	0.018	0.0332	0.0011	0.0318	0.0708	0.0013	0.018	BG
maker-2_E_3R-snap-gene-32.130	0.3971	0	0	0.4543	0	0	0.0001	0	0.0062	0.3076	0	0	1.1	0.0022	0.002	BG
maker-2_E_3R-snap-gene-35.155	0.2112	0.0142	0.0673	0.0001	0	0.0061	0.0001	0	0.0061	0.1811	0.0136	0.075	0.7	0.0014	0.002	BG
snap_masked-3_A_X-processed-gene-2.45	0.2171	0.1965	0.9051	0.0458	0.0004	0.009	0.0377	0.0003	0.0093	0.0001	0	0.0156	0.1059	0.0011	0.01	BG
maker-6_F_4-augustus-gene-1.70	0.0515	0.0169	0.3273	0.0001	0	0.0074	1.0834	0	0	1.9	0.0038	0.002	0.4111	0	0	BG
maker-3_A_X-snap-gene-2.159	0.0251	0.0157	0.6251	0.0001	0	0.0029	0.0001	0	0	0.2719	0.0046	0.0169	0.0001	0	0.0081	BG
maker-2_E_3R-augustus-gene-28.94	0.115	3.0102	26.1832	0.0355	0.0011	0.0309	0.098	0.0023	0.023	0.0001	0	0.0332	0.0539	0.0011	0.0205	BG
maker-2_E_3R-augustus-gene-44.62	0.4119	0.4591	1.1146	0.2034	0.0028	0.0136	27.9207	0.0049	0.0002	0.2589	0.0047	0.018	0.4887	0.0018	0.0036	BG
snap_masked-3_A_X-processed-gene-60.36	0.0191	1.1481	60.2068	0.0001	0	0.0083	0.0404	0.0009	0.0231	0.0001	0	0.0083	0.0365	0.0006	0.0165	BG
maker-2_E_3R-augustus-gene-75.108	0.1023	1.7412	17.0185	0.0001	0	0.0278	0.305	0.0009	0.003	0.0001	0	0.0158	0.0001	0	0.0538	BG
maker-1_C_2R-augustus-gene-64.87	0.165	0.1483	0.899	0.0001	0	0.0247	0.1315	0.0059	0.0446	0.7839	0.007	0.009	0.1297	0.0089	0.0689	BG
maker-4_B_2L-augustus-gene-61.79	0.1378	4.047	29.3709	0.1331	0.0044	0.0332	0.0001	0	0	0.0001	0	0.008	0.0001	0	0	BG
maker-2_E_3R-augustus-gene-105.93	0.0149	0.9034	60.7403	0.0001	0	0.016	0.0001	0	0	0.0458	0.0017	0.0365	0.0001	0	0.0101	BG
maker-4_B_2L-snap-gene-49.152	0.0697	1.0488	15.0434	0.0001	0	0.0129	0.0001	0	0.0093	0.0527	0.0007	0.0132	0.0002	0	0	BG
maker-2_E_3R-snap-gene-15.164	0.0316	1.7521	55.4852	0.0226	0.0004	0.0197	0.0388	0.0007	0.0174	0.0101	0.0002	0.022	0.021	0.0005	0.023	BG
maker-1_C_2R-augustus-gene-40.168	0.0168	0.5962	35.5382	0.0001	0	0.0299	0.0127	0.2806	22.1247	0.0001	0	0.0299	0.1007	0.2655	2.6358	BG
maker-0_D_3L-augustus-gene-25.8	0.1562	0.0445	0.2851	0.0001	0	0	0.1053	0.0039	0.0373	0.0001	0	0.0151	0.016	0.0009	0.0551	BG
maker-1_C_2R-snap-gene-43.17	0.2001	0.0608	0.3037	0.0001	0	0.0118	0.1813	0.0018	0.0099	0.0867	0.0016	0.0184	0.0001	0	0.0152	BG
maker-0_D_3L-augustus-gene-35.15	0.1554	0.0394	0.2533	0.0001	0	0.014	0.0001	0	0	0.0001	0	0.0063	0.0001	0	0	BG
snap_masked-3_A_X-processed-gene-95.62	0.102	0.0297	0.2914	0.0001	0	0.0224	0.278	0.0027	0.0095	0.0001	0	0.0192	0.08	0	0	BG
maker-2_E_3R-augustus-gene-7.8	0.0905	0.0041	0.0451	0.0001	0	0.0052	0.0001	0	0.0161	0.0533	0.0006	0.0106	0.0001	0	0.0105	BG
maker-2_E_3R-augustus-gene-38.139	0.1704	0.0949	0.5569	0.1248	0.0005	0.004	0.2107	0.0011	0.0054	0.0613	0.001	0.0167	0.0001	0	0.0012	BG
maker-2_E_3R-snap-gene-92.115	0.0282	0.0028	0.0999	0.0001	0	0.0104	0.0001	0	0.0186	0.3029	0.0009	0.0029	0.2373	0.6212	2.618	BG
maker-4_B_2L-augustus-gene-34.158	0.091	0.0597	0.6562	0.095	0.0016	0.0166	0.0001	0	0.0127	0.0252	0.0005	0.0181	0.018	0.0003	0.0175	BG
maker-2_E_3R-augustus-gene-65.88	0.3764	0.0134	0.0355	0.2563	0.0055	0.0215	0.2563	0.0055	0.0215	0.2039	0.0103	0.0504	0.3424	0.0064	0.0188	BG
maker-3_A_X-augustus-gene-72.10	0.1137	0.0518	0.4555	0.0359	0.0007	0.0198	0.0485	0.0009	0.0191	0.102	0.0009	0.009	0.0001	0	0.0246	BG
maker-2_E_3R-augustus-gene-78.102	0.0684	1.4062	20.5681	0.1623	0.0026	0.0161	0.07	0.002	0.028	0.0672	0.0013	0.0195	0.0442	0.0013	0.0295	BG
maker-4_B_2L-augustus-gene-31.79	0.0257	1.5613	60.723	0.0001	0	0.0055	0.0249	0.0006	0.0246	0.061	0.0006	0.0092	0.0001	0	0.0122	BG
maker-1_C_2R-augustus-gene-43.133	0.0309	0.0057	0.1838	0.0001	0	0.0192	0.0001	0	0.0192	0.0001	0	0.0173	0.0001	0	0.0176	BG
augustus_masked-0_D_3L-processed-gene-27.0	0.0378	0.0009	0.0226	0.0001	0	0.033	1.2583	0.1329	0.1056	0.0001	0	0.0386	0.0075	0.3022	40.1514	BG
maker-2_E_3R-augustus-gene-92.94	0.0641	0.031	0.484	0.1134	0.0016	0.0145	0.0001	0	0.0453	0.0001	0	0.0049	0.0001	0	0.0304	BG
maker-3_A_X-augustus-gene-78.96	0.131	0.077	0.5881	0.0365	0.0011	0.0295	0.0001	0	0.0253	0.0001	0	0.0178	0.0001	0	0.021	BG
snap_masked-1_C_2R-processed-gene-13.48	0.0759	2.39	31.4875	0.0741	0.0015	0.0208	0.0001	0	0.0205	0.0584	0.0015	0.0265	0.0258	0.0008	0.0302	BG
maker-0_D_3L-augustus-gene-83.79	0.4472	0.4544	1.0161	0.3466	0.0065	0.0188	0.2635	0.0075	0.0286	0.2464	0.0087	0.0352	0.3181	0.008	0.0252	BG
augustus_masked-2_E_3R-processed-gene-91.4	0.1253	0.0993	0.7925	0.0507	0.0017	0.0343	0.0001	0	0.0112	0.0001	0	0.0416	0.0001	0	0.0125	BG
maker-0_D_3L-snap-gene-38.188	0.0752	0.0006	0.0079	0.0001	0	0.0044	0.0001	0	0.0044	0.0509	0.0016	0.031	0.0001	0	0.0087	BG
maker-1_C_2R-augustus-gene-54.100	0.0505	0.0178	0.3528	0.404	0	0	0.0001	0	0	0.0001	0	0	0.0001	0	0.0118	BG
maker-4_B_2L-augustus-gene-69.93	0.1669	0.0088	0.0527	0.1961	0.0021	0.0106	0.1083	0.0108	0.0999	0.0001	0	0.043	0.1083	0.0108	0.0999	BG
maker-2_E_3R-augustus-gene-43.78	0.0176	0.9868	56.018	0.1301	0	0	0.0001	0	0.0515	0.0001	0	0.0139	0.0001	0	0.0576	BG
maker-3_A_X-snap-gene-51.86	0.2278	0.0955	0.4194	0.2731	0	0	0.0001	0	0.0201	1.5	0.003	0.002	0.0001	0	0.0045	BG
maker-4_B_2L-augustus-gene-34.155	0.1023	3.8859	37.9852	0.0001	0	0.0185	0.0001	0	0.0188	0.0001	0	0.0094	0.0001	0	0.0186	BG
maker-4_B_2L-augustus-gene-39.87	0.036	0.0147	0.4072	0.042	0.0005	0.0124	0.0118	0.0003	0.023	0.0211	0.0003	0.014	0.0001	0	0.0294	BG
maker-1_C_2R-snap-gene-71.212	0.2043	0.0703	0.3443	0.0581	0.0019	0.0331	0.0001	0	0	0.1848	0.0026	0.0143	0.0001	0	0	BG
maker-1_C_2R-snap-gene-12.185	0.028	1.7138	61.2293	0.0001	0	0.0054	0.0229	0.0001	0.0049	0.0001	0	0.0165	0.0192	0.0004	0.0216	BG
maker-2_E_3R-augustus-gene-40.8	0.1516	1.0871	7.1694	0.1368	0.0016	0.0114	0.0304	0.0007	0.0244	0.0941	0.0016	0.0166	0.0187	0.0008	0.0405	BG
maker-3_A_X-snap-gene-51.9	0.3202	0.2512	0.7845	0.0815	0.0011	0.0133	0.4735	0.0093	0.0196	0.162	0.0015	0.009	0.2344	0.0053	0.0226	BG
maker-2_E_3R-augustus-gene-105.10	0.0092	0.0027	0.2954	0.4331	0	0	0.7739	0	0	0.3855	0	0	0.4116	0	0	BG
maker-2_E_3R-augustus-gene-30.103	0.1412	6.3501	44.9678	0.0001	0	0.0184	0.0524	0.0018	0.0335	0.1338	0.0037	0.0278	0.0843	0.0018	0.0208	BG
maker-3_A_X-augustus-gene-97.60	0.0303	1.7447	57.5548	0.0001	0	0.0096	0.031	0.0004	0.0142	0.0108	0.0002	0.0203	0.0001	0	0.0058	BG
maker-2_E_3R-augustus-gene-77.85	0.0843	0.0284	0.3372	0.1023	0	0	0.0001	0	0	0.2038	0	0	0.0001	0	0	BG
maker-0_D_3L-augustus-gene-59.110	0.1355	0.021	0.1551	0.049	0.0011	0.0232	0.1018	0.0081	0.08	0.096	0.0022	0.0226	0.1018	0.0081	0.08	BG
maker-3_A_X-augustus-gene-28.112	0.5206	0.8373	1.6083	0.0001	0	0.0029	0.1035	0.0009	0.0089	0.0001	0	0.0091	0.0001	0	0.0089	BG
maker-1_C_2R-augustus-gene-40.159	0.1577	0.1648	1.0454	0.0871	0.002	0.0226	0.0001	0	0	0.1879	0.0044	0.0236	0.0001	0	0	BG
maker-1_C_2R-augustus-gene-41.130	0.0881	0.0309	0.3513	0.0279	0.0006	0.023	0.0176	0.0008	0.0444	0.0957	0.0012	0.0125	0.0459	0.0014	0.0306	BG
maker-0_D_3L-snap-gene-24.122	0.1218	0.0426	0.3496	0.0447	0.001	0.0213	0.1844	0.008	0.0437	0.0736	0.0015	0.0201	0.0278	0.0018	0.0642	BG
maker-4_B_2L-augustus-gene-85.7	0.0063	0.0027	0.4279	0.0001	0	0.0194	0.0001	0	0	0.0001	0	0.0437	0.0001	0	0	BG
augustus_masked-0_D_3L-processed-gene-8.17	0.4932	2.3481	4.7607	0.0001	0	0.0011	0.4923	0.0119	0.0241	0.0001	0	0.0343	4.9	0.0098	0.002	BG
maker-1_C_2R-snap-gene-70.164	0.6336	1.4542	2.2953	0.0457	0.0005	0.0118	0.8025	0	0	0.3019	0.0016	0.0054	1.25	0.0025	0.002	BG
maker-4_B_2L-augustus-gene-83.110	0.117	0.0919	0.7857	0.0001	0	0.021	0.0417	0.0014	0.0329	0.0001	0	0.0296	0.03	0.0012	0.0413	BG
maker-4_B_2L-snap-gene-39.118	0.0983	0.0272	0.277	0.4263	0.0082	0.0193	0.0536	0.0013	0.0249	0.156	0.0012	0.0077	0.0001	0	0.0119	BG
maker-4_B_2L-augustus-gene-22.50	0.224	1.3879	6.1967	0.1967	0.0026	0.0131	0.0568	0.0017	0.0301	0.0426	0.0017	0.0406	0.3559	0.0052	0.0147	BG
maker-5_U_U-augustus-gene-19.70	0.0834	0.017	0.2038	0.3635	0.0028	0.0076	0.0001	0	0	0.0001	0	0.0363	0.0001	0	0	BG
maker-1_C_2R-augustus-gene-63.62	0.1906	2.9497	15.4727	0.0918	0.0009	0.0102	0.1551	0.0017	0.0111	0.1385	0.0014	0.0105	0.1093	0.0011	0.0101	BG
maker-2_E_3R-augustus-gene-105.103	0.0514	1.8224	35.4841	0.0001	0	0.0139	0.0001	0	0	0.0402	0.0011	0.0264	0.0001	0	0	BG
maker-2_E_3R-augustus-gene-81.140	0.0843	0.0215	0.2555	0.2436	0.0026	0.0106	0.0001	0	0.0142	0.0001	0	0.0103	0.0719	0.0026	0.036	BG
maker-4_B_2L-augustus-gene-66.82	0.1828	0.0908	0.4969	0.0234	0.0006	0.0252	0.0767	0.0034	0.0447	0.0426	0.0006	0.0144	0.0351	0.0016	0.0461	BG
maker-4_B_2L-augustus-gene-24.92	0.0878	0.036	0.4102	0.0297	0.0005	0.0159	0.0924	0.001	0.0112	0.0877	0.0009	0.01	0.1126	0.0006	0.0053	BG
maker-2_E_3R-augustus-gene-62.116	0.087	0.0021	0.0244	0.2282	0	0	0.0001	0	0.0075	0.1586	0.0023	0.0146	0.0001	0	0.0146	BG
maker-0_D_3L-snap-gene-11.117	0.3055	0.045	0.1474	0.3176	0.004	0.0127	0.2297	0	0	0.3932	0.0022	0.0057	0.0001	0	0	BG
maker-1_C_2R-augustus-gene-5.96	5.9339	3.8757	0.6531	0.747	0.0064	0.0085	2.0721	0.01	0.0048	1.88	0	0	6.6521	0	0	BG
maker-0_D_3L-augustus-gene-18.150	0.079	3.8277	48.4277	0.0001	0	0.0134	0.114	0.0022	0.0193	0.0001	0	0.0065	0.0001	0	0.0481	BG
maker-0_D_3L-augustus-gene-14.86	0.0224	0.0014	0.0645	0.0001	0	0.0132	0.0083	0.0003	0.0318	0.0179	0.0002	0.0127	0.0001	0	0.0187	BG
maker-1_C_2R-snap-gene-67.144	0.1514	0.0507	0.3352	0.0273	0.0004	0.0162	0.0001	0	0.0017	0.177	0.0019	0.0108	0.4891	0	0	BG
maker-3_A_X-augustus-gene-37.54	0.0146	0.8955	61.2963	0.0001	0	0.0085	0.0001	0	0.0222	0.0001	0	0.0151	0.0001	0	0.032	BG
maker-4_B_2L-snap-gene-61.114	0.0704	1.4367	20.4034	0.0001	0	0.0206	0.0809	0.0016	0.0192	0.0001	0	0.0165	0.0132	0.0008	0.0586	BG
maker-0_D_3L-augustus-gene-8.70	0.1647	0.0456	0.2769	0.6261	0.0046	0.0074	0.1026	0.0029	0.0281	0.1335	0.0025	0.019	0.2951	0.0029	0.0097	BG
maker-1_C_2R-augustus-gene-80.132	0.0955	0.0576	0.6032	0.1828	0.0014	0.0078	0.0682	0.0019	0.0286	0.0001	0	0.0226	0.0697	0.0022	0.0314	BG
maker-2_E_3R-augustus-gene-83.92	0	0	0.3478	NA	NA	NA	NA	NA	NA	NA	NA	NA	0.0875	0	0	BG
maker-1_C_2R-snap-gene-5.149	0.1097	0.0683	0.6232	0.0001	0	0.001	0.0001	0	0	NA	NA	NA	0.0001	0	0	BG
maker-0_D_3L-augustus-gene-34.89	0.2364	0.1102	0.4662	0.2355	0.0038	0.016	0.4934	0.0022	0.0045	0.1319	0.0022	0.0166	0.3006	0.0025	0.0085	BG
maker-1_C_2R-snap-gene-70.183	0.0725	0.0364	0.5022	0.0001	0	0.0134	0.0001	0	0.0293	0.0001	0	0.0062	0.0001	0	0.0182	BG
augustus_masked-0_D_3L-processed-gene-38.20	0.0688	0.0121	0.1762	0.0001	0	0.0046	0.2859	0.0011	0.0038	0.0001	0	0.0083	0.0316	0.0006	0.0176	BG
maker-4_B_2L-augustus-gene-12.44	0.042	1.617	38.4956	0.0001	0	0.0043	0.3029	0.0039	0.0129	0.0001	0	0.0088	0.0001	0	0.0131	BG
maker-4_B_2L-augustus-gene-56.154	0.0712	3.9085	54.9136	0.3858	0	0	0.0878	0.0005	0.006	0.8	0.0016	0.002	0.0882	0.0005	0.0059	BG
maker-2_E_3R-snap-gene-12.83	0.0154	0.0154	0.9967	0.0001	0	0.0063	0.0387	0.0007	0.019	0.0001	0	0.0154	0.0001	0	0.0183	BG
maker-3_A_X-augustus-gene-125.12	0.0631	0.0623	0.9866	0.0001	0	0.0106	0.0001	0	0.0052	0.0001	0	0.0031	0.0001	0	0.0033	BG
maker-1_C_2R-augustus-gene-30.65	0.2235	0.0372	0.1663	0.0001	0	0.0051	0.0001	0	0.0136	0.0001	0	0.0102	0.1597	0.0058	0.0366	BG
maker-1_C_2R-augustus-gene-60.127	0.0633	2.2166	35.0251	0.0001	0	0.0125	0.3194	0.0013	0.0041	0.0441	0.0013	0.0294	0.0648	0.0013	0.02	BG
augustus_masked-0_D_3L-processed-gene-11.22	0.1103	0.0515	0.4667	0.093	0.0013	0.014	0.0176	0.607	34.5264	0.0371	0.0007	0.0176	0.0619	0.008	0.1292	BG
maker-2_E_3R-augustus-gene-100.8	0.0862	0.0569	0.6606	0.0821	0.0008	0.01	0.0356	0.0016	0.0446	0.0001	0	0.0087	0.0245	0.0008	0.0341	BG
maker-2_E_3R-augustus-gene-35.117	0.2617	0.527	2.0134	0.0001	0	0.004	0.0001	0	0.0107	0.0001	0	0.0175	0.1331	0.0016	0.0119	BG
maker-4_B_2L-snap-gene-43.98	0.1264	1.4966	11.8427	0.1301	0.001	0.0077	0.5	0.001	0.002	0.1277	0.001	0.0078	0.0001	0	0.0029	BG
maker-2_E_3R-augustus-gene-84.106	0.0911	3.4898	38.2915	0.5	0.001	0.002	0.112	0.0035	0.0314	0.098	0.001	0.0106	0.4043	0.0039	0.0096	BG
maker-2_E_3R-augustus-gene-83.100	0.063	1.7707	28.0977	0.0298	0.0002	0.0059	0.0876	0.0004	0.0043	0.0801	0.0007	0.0082	0.0666	0.0003	0.0042	BG
snap_masked-2_E_3R-processed-gene-68.28	0.0155	0.9833	63.3859	0.0001	0	0.0052	0.0001	0	0.0034	0.2429	0	0	0.0001	0	0.0184	BG
maker-1_C_2R-augustus-gene-61.97	0.0864	0.033	0.3825	0.0511	0.0005	0.0104	0.0001	0	0.0056	0.0919	0.0012	0.0135	0.19	0.0024	0.0125	BG
maker-4_B_2L-augustus-gene-45.136	0.0556	0.8025	14.429	0.0001	0	0.0125	0.0846	0.0014	0.0168	0.0191	0.0007	0.0365	0.2031	0.0014	0.0069	BG
maker-3_A_X-augustus-gene-64.77	0.1327	0.0568	0.4283	0.1669	0.0013	0.008	0.0094	0.0003	0.027	0.0873	0.0019	0.0219	0.0252	0.0007	0.0292	BG
maker-2_E_3R-augustus-gene-15.133	0.3277	1.385	4.226	0.1066	0.0022	0.0203	0.0503	0.0007	0.0148	0.5453	0.0032	0.0058	0.2571	0.0134	0.0522	BG
augustus_masked-0_D_3L-processed-gene-58.8	0.3092	0.0153	0.0495	0.0001	0	0.0061	0.4625	0.027	0.0585	0.2298	0	0	0.4625	0.027	0.0585	BG
augustus_masked-0_D_3L-processed-gene-16.13	0.1329	0.0845	0.636	0.0859	0.0023	0.0263	0.0001	0	0.0096	0.087	0.0023	0.0265	1	0.002	0.002	BG
maker-4_B_2L-augustus-gene-66.86	0.0229	0.0035	0.1513	0.0001	0	0.0059	0.0001	0	0.0511	0.0001	0	0.0231	0.0545	0.0021	0.0394	BG
maker-2_E_3R-augustus-gene-47.118	0.0526	0.6346	12.0555	0.0001	0	0.0072	0.0145	0.0003	0.0228	0.0001	0	0.0149	0.0153	0.0003	0.0216	BG
maker-3_A_X-augustus-gene-17.25	0.0103	0.3771	36.4401	0.5091	0	0	0.0001	0	0	0.5831	0	0	0.0001	0	0	BG
maker-4_B_2L-augustus-gene-37.68	0.185	2.2925	12.3891	0.0001	0	0.0109	0.0001	0	0	0.0001	0	0.0245	0.0001	0	0	BG
maker-0_D_3L-snap-gene-49.163	1.2362	0.6668	0.5394	0.0001	0	0.0117	0.2782	0.0073	0.0261	0.097	0.0031	0.0322	0.1236	0.0086	0.0696	BG
maker-1_C_2R-augustus-gene-12.144	0.0601	1.6788	27.9143	0.0606	0.001	0.016	0.0001	0	0.0103	0.0197	0.0005	0.0246	0.2105	0.0019	0.009	BG
augustus_masked-0_D_3L-processed-gene-17.10	0.1979	0.1337	0.6758	0.1051	0.0016	0.0149	0.3369	0.0096	0.0285	0.1011	0.0021	0.0203	0.3259	0.004	0.0122	BG
augustus_masked-0_D_3L-processed-gene-56.2	0.074	0.0248	0.3346	0.0857	0.0012	0.0144	0.0001	0	0.0254	0.1049	0.001	0.0098	0.1106	0.0009	0.0084	BG
maker-1_C_2R-augustus-gene-37.133	0.1046	0.0167	0.1601	0.3045	0.0043	0.0141	0.3045	0.0043	0.0141	0.0149	0.0017	0.1137	0.0623	0.0014	0.023	BG
maker-2_E_3R-augustus-gene-74.133	0.2337	0.265	1.1342	0.2648	0.0007	0.0025	0.0553	0.0007	0.0123	0.0651	0.0014	0.0208	0.0001	0	0.012	BG
maker-4_B_2L-snap-gene-2.144	0.7667	0.1111	0.1449	0.2785	0	0	0.5	0.001	0.002	0.3354	0	0	0.0001	0	0.0087	BG
maker-1_C_2R-augustus-gene-62.104	0.4597	0.2442	0.5311	0.45	0.0009	0.002	0.0001	0	0.02	0.0001	0	0.0121	0.086	0.0017	0.0203	BG
snap_masked-2_E_3R-processed-gene-91.3	0.2481	0.1552	0.6254	0.3311	0.0054	0.0162	0.4112	0.0051	0.0123	1.2812	0.0049	0.0038	0.652	0.0085	0.013	BG
maker-2_E_3R-snap-gene-24.136	0.1687	1.0093	5.9833	0.1102	0.0051	0.0466	0.0001	0	0.0057	0.0517	0.0013	0.0251	0.0895	0.001	0.0114	BG
maker-0_D_3L-augustus-gene-13.135	0.0989	0.0403	0.4075	0.0582	0.0007	0.0126	0.1092	0.0008	0.0074	0.0001	0	0.0167	0.0001	0	0.0047	BG
snap_masked-1_C_2R-processed-gene-71.99	0.1107	0.2431	2.1967	0.0001	0	0.021	0.0001	0	0.0124	0.0001	0	0.0079	0.1709	0.0014	0.008	BG
maker-1_C_2R-augustus-gene-20.155	0.0128	0.7869	61.6353	0.1437	0	0	0.0001	0	0.0179	0.0001	0	0.0096	0.0001	0	0.0016	BG
maker-0_D_3L-snap-gene-44.123	0.263	0.0087	0.033	0.1318	0.0022	0.0169	0.0001	0	0.0435	0.4265	0.0022	0.0052	0.0001	0	0.0435	BG
augustus_masked-3_A_X-processed-gene-43.14	0.0301	1.5239	50.6753	0.7	0.0014	0.002	0.0001	0	0.0126	0.0001	0	0.0131	0.0001	0	0.0103	BG
maker-1_C_2R-augustus-gene-25.105	0.029	1.7667	60.9533	0.0001	0	0.0126	0.0184	0.0006	0.0329	0.0001	0	0.0172	0.0001	0	0.0273	BG
maker-0_D_3L-snap-gene-11.129	0.0535	0.0118	0.2197	0.0151	0.0003	0.0228	0.007	0.0004	0.051	0.0513	0.0007	0.0134	0.0068	0.0004	0.0518	BG
maker-3_A_X-augustus-gene-88.74	0.046	2.5669	55.8312	0.0001	0	0.0136	0.0001	0	0.0131	0.0001	0	0.0019	0.0001	0	0.0041	BG
maker-2_E_3R-snap-gene-35.146	0.0499	2.9652	59.4093	0.0184	0.0003	0.0147	0.0001	0	0.0039	0.0001	0	0.0185	0.0001	0	0.0043	BG
maker-3_A_X-augustus-gene-65.60	0.2284	0.1177	0.5154	0.0217	0.0006	0.029	0.0001	0	0.0413	0.0001	0	0.0061	0.1372	0.0019	0.0136	BG
maker-3_A_X-augustus-gene-97.7	0.6147	0.1364	0.2219	1.4672	0.0067	0.0045	0.2	0.0004	0.002	0.5779	0.0084	0.0145	0.1953	0.0005	0.0027	BG
maker-1_C_2R-augustus-gene-9.159	0.1054	0.012	0.1141	0.0001	0	0.0037	0.0001	0	0.0111	0.2244	0	0	0.0001	0	0.0073	BG
maker-3_A_X-augustus-gene-57.90	0.0094	0.5883	62.2781	0.0001	0	0.009	0.0001	0	0.0198	0.0001	0	0.0086	0.0001	0	0.0116	BG
maker-0_D_3L-augustus-gene-59.99	0.0185	0.0046	0.2494	0.0001	0	0.0122	0.0079	0.0006	0.075	0.0178	0.0004	0.0252	0.0064	0.0004	0.0597	BG
maker-0_D_3L-augustus-gene-56.97	0.0351	2.0388	58.076	0.0001	0	0.0455	0.0001	0	0.0388	0.0271	0.0016	0.0596	0.0485	0.0016	0.033	BG
maker-2_E_3R-augustus-gene-100.80	0.0312	1.7742	56.8487	0.0001	0	0.0083	0.0001	0	0	0.0001	0	0.022	0.0001	0	0.0016	BG
maker-2_E_3R-augustus-gene-35.115	0.0436	0.0034	0.0768	0.0001	0	0.0264	0.0001	0	0.0264	0.0802	0.007	0.0877	0.2846	0.0027	0.0094	BG
maker-2_E_3R-augustus-gene-86.103	0.1276	2.4933	19.5403	0.0972	0.0012	0.0128	0.0001	0	0.0128	0.1615	0.0028	0.0175	0.0672	0.0027	0.0406	BG
maker-3_A_X-augustus-gene-74.70	0.1992	0.1354	0.6797	0.1536	0.0024	0.0156	0.0001	0	0.0398	0.2606	0.0037	0.014	0.0711	0.0056	0.0793	BG
augustus_masked-0_D_3L-processed-gene-79.10	0.085	4.2642	50.1784	0.0001	0	0.0079	0.2074	0.0033	0.016	0.2266	0.0032	0.014	0.0505	0.0015	0.0289	BG
maker-1_C_2R-augustus-gene-80.129	0.072	3.6718	51.0051	0.0001	0	0.0128	0.0001	0	0.0117	0.1537	0.0014	0.0092	0.7381	0.0028	0.0039	BG
maker-2_E_3R-augustus-gene-98.89	0.0331	0.0327	0.9899	0.0001	0	0.0101	0.0001	0	0.0197	0.0001	0	0.0099	0.0341	0.0006	0.0174	BG
maker-1_C_2R-augustus-gene-42.126	0.0984	2.4313	24.7209	0.0478	0.0009	0.0187	0.0474	0.0007	0.0138	0.0688	0.0018	0.0262	0.0335	0.0006	0.0193	BG
maker-6_F_4-augustus-gene-4.75	5.7326	2.2662	0.3953	0.4352	0	0	0.0796	0	0	0.3428	0	0	0.0001	0	0	BG
maker-0_D_3L-augustus-gene-80.88	0.1366	0.0317	0.2322	0.0001	0	0	0.0001	0	0.0163	0.4396	0	0	0.0001	0	0.0165	BG
snap_masked-2_E_3R-processed-gene-86.88	0.0436	0.0157	0.3606	0.0001	0	0.0078	0.0001	0	0.0426	0.058	0.0012	0.0198	0.0001	0	0.0238	BG
maker-0_D_3L-augustus-gene-66.33	0.4734	0.9637	2.0357	3.15	0.0063	0.002	0.1888	0.0146	0.0772	0.666	0.0194	0.0291	0.5011	0.0323	0.0645	BG
maker-4_B_2L-augustus-gene-10.78	0.1522	0.0861	0.5657	0.0653	0.0012	0.0179	0.0634	0.0018	0.0291	0.084	0.0016	0.0185	0.0591	0.0019	0.0324	BG
maker-2_E_3R-snap-gene-96.6	0.084	0.0641	0.7634	0.0001	0	0.0069	0.0001	0	0	0.0001	0	0.0098	0.0001	0	0	BG
maker-5_U_U-augustus-gene-19.8	0.1248	1.4213	11.3903	0.0001	0	0.0237	0.0001	0	0.0406	0.3251	0.0027	0.0082	0.2196	0.0074	0.0336	BG
maker-2_E_3R-augustus-gene-70.72	0.0402	0.0126	0.3124	0.1059	0.0005	0.005	0.0001	0	0.0235	0.0571	0.0005	0.0096	0.0001	0	0.0219	BG
augustus_masked-0_D_3L-processed-gene-62.25	0.0668	0.0189	0.2827	0.0001	0	0.0033	0.0001	0	0.0084	0.0001	0	0.0201	0.0001	0	0.0121	BG
maker-3_A_X-augustus-gene-27.68	0.1401	0	0	0.1244	0.0023	0.0182	0.2693	0.004	0.015	0.0983	0.0038	0.0382	0.1787	0.0067	0.0374	BG
maker-1_C_2R-snap-gene-24.154	0.5943	0.7735	1.3015	0.3941	0	0	0.0001	0	0.0506	0.0001	0	0.018	6.1	0.0122	0.002	BG
maker-0_D_3L-augustus-gene-30.9	0.0655	0.0517	0.7904	0.0001	0	0.006	0.0001	0	0.0259	0.0668	0.001	0.0145	0.0001	0	0.0387	BG
maker-2_E_3R-augustus-gene-63.142	0.0846	1.5399	18.1992	0.0001	0	0.0017	0.0001	0	0.0091	0.4478	0.0016	0.0035	0.0587	0.0005	0.0092	BG
maker-2_E_3R-augustus-gene-13.115	0.0352	0.0104	0.2943	0.2985	0	0	0.0001	0	0.0255	0.0001	0	0.0135	0.0001	0	0.008	BG
maker-2_E_3R-augustus-gene-82.13	0.5187	0.2865	0.5523	0.0001	0	0.0176	0.049	0.0009	0.019	0.0551	0.0009	0.0167	0.022	0.0008	0.0352	BG
maker-1_C_2R-augustus-gene-65.	0.4106	0.4164	1.0141	0.0699	0.0011	0.0156	0.1408	0.0082	0.0582	0.0223	0.0011	0.0496	0.062	0.002	0.0315	BG
maker-3_A_X-augustus-gene-100.44	0.145	0.1208	0.8329	0.8287	0.0023	0.0027	0.0001	0	0	0.3773	0.0034	0.0091	0.2485	0	0	BG
maker-3_A_X-augustus-gene-59.103	0.1368	0.0512	0.3744	0.0001	0	0.0246	0.95	0.0019	0.002	0.1623	0.0038	0.0235	0.0001	0	0.0057	BG
snap_masked-0_D_3L-processed-gene-67.25	0.1307	0.0337	0.2579	0.2524	0	0	0.145	0.0025	0.0172	0.0001	0	0.0108	0.0001	0	0.0168	BG
maker-0_D_3L-augustus-gene-75.112	0.0416	2.4044	57.7642	0.0001	0	0.0278	0.0001	0	0.0024	0.0319	0.0008	0.025	0.0001	0	0.0025	BG
maker-1_C_2R-augustus-gene-16.94	0.0973	0.0434	0.4459	0.0001	0	0.0098	0.09	0.0037	0.0409	0.0288	0.0008	0.027	0.0475	0.0013	0.0284	BG
snap_masked-3_A_X-processed-gene-7.63	0.1716	0.0735	0.428	0.0001	0	0.0045	0.0001	0	0.0171	0.0939	0.0007	0.0078	0.1267	0.0019	0.0149	BG
maker-0_D_3L-augustus-gene-84.90	0.0175	1.1223	64.048	0.0001	0	0	0.0001	0	0.0139	0.0333	0.0014	0.0409	0.0334	0.0006	0.0184	BG
maker-0_D_3L-snap-gene-68.96	0.1075	0.9695	9.0146	0.0001	0	0.012	0.3417	0.0009	0.0028	0.0001	0	0.0081	0.0001	0	0.0055	BG
maker-5_U_U-augustus-gene-19.69	0.0095	0.0077	0.8061	0.0001	0	0.0104	0.9394	0.0018	0.0019	0.0324	0.0006	0.0186	0.0001	0	0	BG
maker-2_E_3R-augustus-gene-30.100	0.1711	0.1727	1.0096	0.1087	0.0016	0.0148	0.0697	0.0011	0.0164	0.2283	0.0036	0.0157	0.1388	0.004	0.0287	BG
maker-1_C_2R-snap-gene-40.207	0.056	0.0359	0.6414	0.0001	0	0.0258	0.0001	0	0.0373	0.0001	0	0.0053	0.0001	0	0	BG
maker-1_C_2R-augustus-gene-84.118	0.0417	0	0	0.0285	0.0009	0.0299	0.0285	0.0009	0.0299	0.0217	0.0022	0.1025	0.0202	0.0009	0.0421	BG
maker-3_A_X-augustus-gene-44.115	0.7534	1.1665	1.5484	0.3668	0	0	0.0001	0	0.0063	0.3138	0	0	0.0001	0	0.0063	BG
maker-0_D_3L-augustus-gene-13.122	0.0252	1.4392	57.1709	0.0001	0	0.015	0.0001	0	0.006	0.0001	0	0.0092	0.0001	0	0.0091	BG
maker-4_B_2L-snap-gene-85.86	0.0568	1.7402	30.6303	0.0001	0	0.0184	0.0523	0.0028	0.0529	0.0383	0.0008	0.0214	0.0001	0	0.0394	BG
maker-2_E_3R-snap-gene-82.16	0.1302	0.0772	0.5933	0.0001	0	0.0013	0.0278	0.5554	19.9855	0.0001	0	0.0394	3.35	0.0067	0.002	BG
snap_masked-4_B_2L-processed-gene-38.63	0.2278	0.1105	0.485	0.0455	0.0013	0.0294	0.4745	0.004	0.0085	0.1406	0.0041	0.0294	0.55	0.0011	0.002	BG
maker-3_A_X-snap-gene-36.76	0.0671	0.032	0.4766	0.0001	0	0.0199	0.0001	0	0	0.0001	0	0	0.0001	0	0	BG
maker-0_D_3L-augustus-gene-75.94	0.0821	0.0366	0.4459	0.0001	0	0.0028	0.0755	0.0014	0.019	0.0001	0	0.0023	0.0001	0	0.0114	BG
snap_masked-1_C_2R-processed-gene-71.102	0.0631	1.4901	23.633	0.0001	0	0.0062	0.0382	0.0009	0.0232	0.0001	0	0.0312	0.3653	0.0014	0.0039	BG
maker-1_C_2R-augustus-gene-61.93	0.1561	0.0933	0.598	0.0633	0.0009	0.015	0.0291	0.0008	0.0282	0.0322	0.0006	0.0196	0.052	0.0009	0.0182	BG
maker-1_C_2R-augustus-gene-39.168	0.3661	0.077	0.2103	0.0001	0	0.0019	0.24	0.0037	0.0154	0.246	0.0018	0.0074	1.6234	0.0022	0.0014	BG
maker-4_B_2L-augustus-gene-24.95	0.0271	0.0007	0.025	0.0001	0	0.0109	0.0001	0	0	0.2208	0	0	0.0001	0	0.0222	BG
maker-2_E_3R-augustus-gene-90.77	0.1118	0.0182	0.1626	0.1828	0.001	0.0054	0.5	0.001	0.002	0.0001	0	0.0071	0.0001	0	0.0125	BG
maker-2_E_3R-augustus-gene-62.117	0.1282	0.0663	0.5176	0.1774	0.0009	0.0048	0.517	0.0013	0.0024	0.1736	0.0023	0.0133	0.4575	0.0021	0.0045	BG
maker-2_E_3R-augustus-gene-78.13	0.0392	1.0812	27.6025	0.042	0.0012	0.0283	0.0234	0.0012	0.0501	0.018	0.0006	0.0329	0.0001	0	0.0517	BG
augustus_masked-0_D_3L-processed-gene-0.15	0.1458	1.0363	7.107	0.0734	0.0006	0.0088	0.6808	0.0013	0.0019	0.148	0.002	0.0135	0.0001	0	0	BG
augustus_masked-2_E_3R-processed-gene-64.4	0.256	0.2347	0.917	0.2082	0.0051	0.0247	0.5865	0.0033	0.0057	0.0289	0.0009	0.0297	0.0471	0.0015	0.0309	BG
maker-2_E_3R-augustus-gene-16.134	0.0487	1.7001	34.8985	0.0001	0	0.0031	0.0001	0	0.016	0.0001	0	0.012	0.0001	0	0.037	BG
augustus_masked-3_A_X-processed-gene-26.5	0.1243	0.0647	0.5209	0.0225	0.0011	0.0489	0.139	0.178	1.281	0.0635	0.0022	0.0349	0.1343	0.0086	0.0638	BG
maker-2_E_3R-augustus-gene-83.103	0.0257	0.0087	0.3393	0.0001	0	0.0144	0.0001	0	0.0423	0.0001	0	0.0318	0.0001	0	0.0251	BG
maker-3_A_X-augustus-gene-82.56	0.1145	0.0291	0.2542	0.0001	0	0.0126	0.0001	0	0	0.3847	0	0	0.0001	0	0	BG
maker-4_B_2L-augustus-gene-13.5	0.1127	1.5623	13.8567	0.0001	0	0	0.0001	0	0.0292	0.0216	0.0005	0.0252	0.0001	0	0.0129	BG
snap_masked-0_D_3L-processed-gene-43.14	0.0662	0.0251	0.3793	0.0502	0.0012	0.0248	0.035	0.0011	0.0313	0.0001	0	0.0247	0.0656	0.0016	0.0245	BG
maker-5_U_U-augustus-gene-19.86	0.134	0.1018	0.7598	0.1346	0.0023	0.0174	0.0001	0	0	0.1538	0.0037	0.0238	0.0001	0	0	BG
maker-0_D_3L-augustus-gene-57.69	0.0675	0.0093	0.1376	0.0001	0	0.0106	0.039	0.0013	0.0327	0.0001	0	0.025	0.0478	0.0013	0.0267	BG
augustus_masked-0_D_3L-processed-gene-17.20	0.1058	0.0543	0.513	0.0001	0	0.018	0.1365	0.0023	0.0172	0.0001	0	0.0092	1.2	0.0024	0.002	BG
maker-3_A_X-augustus-gene-57.88	0.5419	0.1315	0.2426	0.1158	0.0014	0.0125	0.0001	0	0.0125	1.6	0.0032	0.002	0.1423	0.0043	0.0301	BG
maker-3_A_X-augustus-gene-55.77	0.0662	0.0161	0.2428	0.1287	0.0016	0.0127	0.0262	0.0007	0.0263	0.1273	0.0016	0.0123	0.0436	0.0019	0.0425	BG
maker-3_A_X-snap-gene-43.103	0.2458	0.1423	0.5788	0.7253	0.0051	0.007	0.3953	0.003	0.0076	0.1397	0.0027	0.0191	0.174	0.0032	0.0186	BG
maker-0_D_3L-augustus-gene-38.139	0.1299	2.0144	15.5033	0.0293	0.0003	0.0113	0.0001	0	0.0056	0.9744	0.0036	0.0037	0.0001	0	0.0056	BG
maker-2_E_3R-augustus-gene-23.85	0.1448	0.0831	0.5741	0.1071	0.0009	0.0085	0.1132	0.001	0.0092	0.0001	0	0.0084	0.2042	0.0009	0.0042	BG
maker-2_E_3R-snap-gene-108.5	0.0249	1.5698	63.1206	0.0555	0.0005	0.0093	0.0001	0	0	0.0553	0.0005	0.009	0.0001	0	0	BG
maker-2_E_3R-snap-gene-86.175	0.0848	0.0531	0.6259	0.1102	0.0015	0.0132	0.0483	0.002	0.042	0.0378	0.0012	0.031	0.0639	0.003	0.0477	BG
maker-4_B_2L-snap-gene-0.8	0.0316	0.0113	0.3575	0.3325	0	0	0.0982	0.0024	0.0241	0.0001	0	0.0253	0.0001	0	0.0432	BG
maker-2_E_3R-augustus-gene-18.110	0.5358	1.0131	1.8908	0.2097	0	0	0.3554	0	0	0.3823	0	0	0.4593	0	0	BG
maker-2_E_3R-snap-gene-71.160	0.0229	0.0092	0.4033	0.0001	0	0.0061	0.0001	0	0.0103	0.0001	0	0.0181	0.0271	0.0008	0.0293	BG
maker-3_A_X-augustus-gene-98.57	0.0489	2.6103	53.3904	0.2959	0	0	0.0001	0	0	0.0001	0	0.0053	0.0001	0	0	BG
maker-1_C_2R-augustus-gene-19.108	0.1269	0.0707	0.5574	0.0205	0.001	0.0465	0.0001	0	0.0276	0.0818	0.0009	0.0116	0.0001	0	0.0198	BG
maker-0_D_3L-augustus-gene-53.119	0.0966	0.0187	0.1936	0.0001	0	0.0115	0.0592	0.0028	0.0476	0.0001	0	0.0083	0.0181	0.0005	0.027	BG
maker-2_E_3R-augustus-gene-67.137	0.2434	0.8367	3.4376	0.0001	0	0.0164	0.0239	0.0004	0.0176	0.0371	0.0012	0.0322	0.0299	0.0008	0.0284	BG
maker-0_D_3L-augustus-gene-5.80	0.1061	0.0465	0.4381	0.0001	0	0.014	0.0001	0	0	0.0001	0	0.019	0.0001	0	0	BG
maker-3_A_X-augustus-gene-58.94	0.4915	0.746	1.5179	0.0001	0	0.0065	0.0001	0	0.0086	0.0001	0	0	0.0001	0	0.0086	BG
maker-1_C_2R-augustus-gene-14.107	0.1903	0.0985	0.5177	0.0001	0	0.0086	0.3548	0.0017	0.0049	0.0886	0.0013	0.0148	0.0001	0	0.0048	BG
maker-2_E_3R-augustus-gene-82.128	0.1864	3.5575	19.083	0.1297	0.0021	0.0159	0.2369	0.0073	0.0307	0.1187	0.001	0.0088	0.1589	0.0051	0.0318	BG
maker-2_E_3R-augustus-gene-55.133	0.0644	0.0281	0.4364	0.0001	0	0.0188	0.0001	0	0.0207	0.0001	0	0.0369	0.0001	0	0.0238	BG
maker-1_C_2R-augustus-gene-13.96	0.1569	0.0601	0.3831	0.0616	0.0006	0.0094	0.103	0.0019	0.0188	0.2362	0.0031	0.0131	0.0468	0.001	0.0206	BG
maker-1_C_2R-augustus-gene-82.104	0.1836	1.2924	7.0386	0.0001	0	0.0141	0.2108	0.0043	0.0203	0.0001	0	0.014	0.1557	0.0043	0.0275	BG
augustus_masked-4_B_2L-processed-gene-47.7	0.1561	0	0	0.0001	0	0.01	0.0001	0	0	0.0001	0	0	0.0001	0	0	BG
maker-2_E_3R-augustus-gene-38.13	0.1386	0.0772	0.5569	0.0599	0.0014	0.0237	0.1314	0.0024	0.018	0.1016	0.0025	0.0242	0.026	0.0008	0.0305	BG
maker-2_E_3R-augustus-gene-7.89	0.0505	0.0178	0.3524	0.087	0.0007	0.0083	0.0244	0.0007	0.0292	0.0307	0.0004	0.0122	0.0001	0	0.0299	BG
augustus_masked-3_A_X-processed-gene-6.	0.1968	2.0069	10.1988	0.2033	0.0021	0.0104	0.0995	0.0021	0.021	0.0001	0	0.0161	0.157	0.0036	0.0232	BG
maker-3_A_X-augustus-gene-75.110	0.288	0.2749	0.9546	0.1286	0.002	0.0155	0.0001	0	0	0.1081	0.0017	0.016	0.0001	0	0	BG
snap_masked-0_D_3L-processed-gene-83.42	0.0369	0.0081	0.2199	0.0001	0	0.003	0.0001	0	0.0122	0.0001	0	0	0.0001	0	0.0031	BG
maker-3_A_X-augustus-gene-46.87	0.4875	0.4282	0.8783	0.0001	0	0.0132	0.0001	0	0.0389	0.0001	0	0.0132	0.0001	0	0.0389	BG
augustus_masked-4_B_2L-processed-gene-87.2	0.1153	0.0451	0.3909	0.0617	0.0013	0.0217	0.0759	0.0013	0.0178	0.1328	0.0027	0.0203	0.0001	0	0.0164	BG
maker-3_A_X-augustus-gene-72.9	0.2024	7.7073	38.0814	0.0001	0	0.0078	0.0001	0	0	0.0001	0	0.0251	0.0001	0	0.0081	BG
augustus_masked-1_C_2R-processed-gene-52.13	0.123	0.0786	0.6388	0.0891	0.0017	0.0191	0.0878	0.0052	0.0588	0.0277	0.0008	0.03	0.0973	0.0038	0.0394	BG
augustus_masked-4_B_2L-processed-gene-86.5	0.8687	0.5169	0.595	0.0001	0	0	0.0848	0.0028	0.0333	0.234	0.002	0.0087	0.127	0.0083	0.0654	BG
maker-0_D_3L-augustus-gene-73.137	0.0656	3.2898	50.1805	0.4	0.0008	0.002	0.0001	0	0.0042	0.1041	0.0015	0.0148	0.0001	0	0.0066	BG
maker-2_E_3R-augustus-gene-32.10	0.0568	0.3162	5.5675	0.0001	0	0.0115	0.175	0.0016	0.0093	0.0684	0.0008	0.0117	0.2026	0.0008	0.004	BG
maker-2_E_3R-snap-gene-35.168	1.2434	1.047	0.8421	1.5	0.003	0.002	0.0001	0	0.0167	1.45	0.0029	0.002	0.0001	0	0	BG
maker-3_A_X-augustus-gene-43.98	0.1059	0.9744	9.2022	0.3	0	0	0.0001	0	0.0643	0.2495	0	0	0.0001	0	0.0646	BG
maker-2_E_3R-augustus-gene-5.140	0.0252	0.8668	34.4533	0.0001	0	0	0.0001	0	0.0331	0.0001	0	0.0276	0.0001	0	0.0448	BG
maker-0_D_3L-augustus-gene-42.108	0.0955	0.001	0.0108	0.0001	0	0.0062	0.1092	0.0013	0.0117	0.0001	0	0	0.0001	0	0.002	BG
maker-1_C_2R-augustus-gene-30.7	0.0203	0.005	0.2444	0.0001	0	0.0036	0.0001	0	0.015	4.1483	0	0	0.0001	0	0.0113	BG
maker-2_E_3R-augustus-gene-95.50	0.0427	1.1724	27.461	0.0001	0	0.0054	0.0001	0	0.0135	0.0001	0	0.0487	0.0001	0	0.056	BG
maker-4_B_2L-augustus-gene-62.106	0.1016	0.0764	0.7517	0.0001	0	0	0.1516	0.0037	0.0247	0.2487	0.0044	0.0177	0.0001	0	0.0042	BG
maker-0_D_3L-augustus-gene-53.105	0.0394	0.0132	0.3346	0.0001	0	0.0071	0.0232	0.0012	0.0499	0.025	0.0008	0.0329	0.0167	0.0009	0.0527	BG
maker-3_A_X-snap-gene-69.100	0.4188	0.205	0.4894	0.511	0.0032	0.0063	0.2544	0.0084	0.0332	0.3853	0.0011	0.0028	5.5941	0	0	BG
maker-3_A_X-augustus-gene-28.88	0.577	4.9166	8.5214	0.7496	0.0028	0.0037	0.0858	0.0007	0.0082	0.4996	0.0044	0.0088	0.0001	0	0.0054	BG
augustus_masked-4_B_2L-processed-gene-45.23	0.072	3.5542	49.3842	0.0001	0	0.0332	0.0001	0	0	0.0489	0.0007	0.0147	0.0001	0	0	BG
maker-4_B_2L-snap-gene-72.12	0.1391	0.1343	0.9653	0.2017	0.001	0.0049	0.0595	0.003	0.0512	0.1374	0.0025	0.0181	0.0579	0.0053	0.0924	BG
maker-2_E_3R-snap-gene-8.57	0.1104	0.062	0.5619	1.2066	0.0154	0.0127	0.3534	0.0089	0.0253	0.4199	0.0074	0.0176	0.1144	0.0047	0.0413	BG
snap_masked-2_E_3R-processed-gene-81.73	0.0189	0.0064	0.3412	0.0132	0.0003	0.0222	0.0029	0.0002	0.0528	0.0052	0.0002	0.0305	0.0031	0.0002	0.0486	BG
maker-3_A_X-snap-gene-62.88	0.0729	0.0389	0.5342	0.0632	0.0018	0.0285	0.0181	0.0004	0.0236	0.0524	0.0012	0.0233	0.0124	0.0003	0.0241	BG
maker-4_B_2L-augustus-gene-73.80	0.5331	1.1844	2.2219	0.3422	0	0	0.0001	0	0.0081	0.4093	0	0	0.0001	0	0.0081	BG
maker-4_B_2L-augustus-gene-62.92	0.0889	0.0381	0.429	0.0001	0	0.0186	0.0389	0.0016	0.0409	0.0001	0	0.0125	0.0001	0	0.0133	BG
snap_masked-1_C_2R-processed-gene-7.74	0.0693	0.0153	0.2212	0.0001	0	0.0168	0.0001	0	0.0087	0.0587	0.0019	0.0329	0.0001	0	0	BG
maker-2_E_3R-augustus-gene-14.87	0.1047	0.0952	0.9089	0.0715	0.0009	0.0126	0.0001	0	0	0.047	0.0014	0.0287	0.0001	0	0	BG
maker-2_E_3R-augustus-gene-58.135	0.0437	0.0134	0.3062	0.0001	0	0.0122	0.0416	0.0006	0.0134	0.0001	0	0.0346	0.04	0.0007	0.0179	BG
maker-4_B_2L-augustus-gene-29.93	0.1111	0.0818	0.7366	0.0231	0.0008	0.0326	0.1164	0.0015	0.013	0.0418	0.0014	0.0336	0.1554	0.0029	0.0189	BG
maker-2_E_3R-augustus-gene-16.112	0.1735	0.0866	0.4989	0.0001	0	0.0031	0.4494	0.0034	0.0076	0.2056	0.0028	0.0135	0.0641	0.0025	0.0384	BG
maker-2_E_3R-augustus-gene-86.137	0.0912	1.9627	21.5296	0.0001	0	0.0059	0.0458	0.0016	0.0355	0.0594	0.0011	0.0179	0.0001	0	0.03	BG
maker-4_B_2L-augustus-gene-34.144	0.0571	0	0	1.2721	0.0019	0.0015	0.0673	0.0013	0.0193	0.0001	0	0.0053	0.0342	0.0006	0.0189	BG
maker-1_C_2R-augustus-gene-18.90	0.6282	0.9054	1.4413	0.4891	0.0046	0.0094	0.0001	0	0.0194	0.7164	0.0093	0.013	3.55	0.0071	0.002	BG
augustus_masked-4_B_2L-processed-gene-19.16	0.4067	0.3556	0.8745	0.2489	0.0047	0.0188	1.45	0.0029	0.002	2.2916	0	0	1.45	0.0029	0.002	BG
augustus_masked-1_C_2R-processed-gene-12.35	0.2899	0.0534	0.1843	27.5801	0.0022	0.0001	0.0785	0.0064	0.0821	0.3041	0.0066	0.0219	0.0689	0.0051	0.0739	BG
maker-0_D_3L-augustus-gene-43.93	0.1263	0.0663	0.5247	0.1199	0.0015	0.0127	0.0323	0.0008	0.0234	0.0001	0	0.0318	0.279	0.0023	0.0081	BG
maker-3_A_X-augustus-gene-30.78	0.2501	0.0124	0.0497	0.1508	0.0023	0.015	0.5468	0.0144	0.0263	0.0466	0.0005	0.0115	NA	NA	NA	BG
maker-0_D_3L-augustus-gene-30.107	0.0574	0.0145	0.2518	0.1116	0.0019	0.0171	0.0001	0	0.0464	0.0001	0	0.033	0.0001	0	0.0438	BG
maker-2_E_3R-augustus-gene-86.12	0.0745	1.0375	13.9172	0.0001	0	0.0228	0.0001	0	0.0326	0.2298	0.0027	0.0116	0.0217	0.0013	0.0603	BG
maker-1_C_2R-augustus-gene-1.113	0.086	0.0651	0.7566	0.0988	0.0017	0.0173	0.0001	0	0	0.154	0.0017	0.0111	0.0001	0	0	BG
maker-3_A_X-augustus-gene-36.55	0.0116	0.0035	0.2982	0.1868	0.5442	2.9128	0.0001	0	0	0.0001	0.0001	0.654	0.0001	0	0	BG
maker-0_D_3L-snap-gene-51.225	0.0552	0.0112	0.2033	0.1621	0.0015	0.0092	0.0001	0	0	0.0001	0	0	0.0001	0	0	BG
maker-4_B_2L-augustus-gene-33.103	0.0894	1.1928	13.3398	0.0001	0	0	0.0001	0	0.0284	0.0001	0	0.0088	0.0739	0.002	0.0267	BG
maker-2_E_3R-augustus-gene-82.114	0.1125	0.0109	0.0965	0.0001	0	0.0112	0.2569	0.0128	0.05	0.0226	0.0005	0.021	0.2569	0.0128	0.05	BG
maker-0_D_3L-augustus-gene-26.98	0.0413	2.3696	57.3276	0.0528	0.0004	0.0081	0.0141	0.0003	0.0242	0.1362	0.002	0.0149	0.0124	0.0003	0.0277	BG
maker-1_C_2R-augustus-gene-71.153	0.1829	0.011	0.0602	0.0001	0	0.0175	0.0001	0	0.0073	0.0001	0	0.006	0.173	0.0012	0.0068	BG
maker-2_E_3R-augustus-gene-6.70	0.096	0.0363	0.3784	0.0495	0.0008	0.0167	0.0188	0.0004	0.0201	0.1356	0.0016	0.0115	0.053	0.0011	0.0216	BG
maker-0_D_3L-augustus-gene-36.136	0.196	0.0692	0.353	0.2452	0.0041	0.0168	0.0001	0	0	0.0324	0.0008	0.0243	0.2224	0	0	BG
snap_masked-2_E_3R-processed-gene-38.117	0.5592	0.0426	0.0761	0.5093	0.006	0.0117	0.4776	0.0101	0.0212	0.5012	0.007	0.0139	0.4343	0.0097	0.0223	BG
maker-1_C_2R-snap-gene-11.120	0.1125	0.0334	0.2967	0.0417	0.0009	0.0207	0.0001	0	0.0317	0.0001	0	0.0198	0.0648	0.0008	0.013	BG
snap_masked-1_C_2R-processed-gene-70.38	0.4932	1.077	2.1836	0.3553	0	0	0.338	0	0	0.4597	0	0	0.0001	0	0.0099	BG
maker-3_A_X-augustus-gene-11.68	0.0831	0.0494	0.5941	0.0001	0	0.0057	1	0.002	0.002	0.0001	0	0.0139	0.0001	0	0.0119	BG
maker-2_E_3R-augustus-gene-94.96	0.0108	0.0047	0.4319	0.0001	0	0.0172	0.0001	0	0.0432	0.0001	0	0.0248	0.0001	0	0.0312	BG
maker-2_E_3R-augustus-gene-98.78	0.0247	0.0052	0.2098	0.4739	0	0	0.0001	0	0.0397	0.3468	0	0	0.5619	0	0	BG
maker-1_C_2R-augustus-gene-76.104	0.2419	8.6151	35.6161	0.1249	0.0022	0.0176	0.0323	0.0012	0.0376	0.0708	0.0012	0.017	0.0001	0	0.0244	BG
maker-2_E_3R-augustus-gene-60.126	0.0247	0.0112	0.452	0.0305	0.0005	0.0151	0.2468	0.001	0.004	0.0233	0.0009	0.0402	0.0321	0.0005	0.0144	BG
augustus_masked-0_D_3L-processed-gene-4.2	0.0793	0.0566	0.7138	0.3531	0	0	0.0001	0	0	0.0001	0	0	0.0001	0	0	BG
maker-1_C_2R-augustus-gene-14.103	0.1627	0.0794	0.4881	0.2197	0.0036	0.0166	0.0725	0.0007	0.0097	0.0439	0.0007	0.0158	0.1378	0.0021	0.015	BG
maker-3_A_X-augustus-gene-63.5	0.1572	3.9822	25.3304	0.0001	0	0.0088	0.1349	0.0072	0.053	0.0001	0	0.0083	0.0001	0	0.0604	BG
maker-1_C_2R-augustus-gene-71.182	0.2111	0.1848	0.8754	57.6082	0.0014	0	0.0001	0	0	0.1815	0.0056	0.0306	0.0001	0	0	BG
maker-3_A_X-augustus-gene-55.78	0.0049	0.0014	0.2842	0.0001	0	0.0083	0.0176	0.0008	0.0465	0.0001	0	0.0408	0.0001	0	0.0201	BG
snap_masked-1_C_2R-processed-gene-37.93	0.0506	1.398	27.6167	0.0283	0.0007	0.026	0.0001	0	0	0.0835	0.0022	0.0264	0.0001	0	0	BG
maker-2_E_3R-snap-gene-2.132	0.0158	0.006	0.382	0.0001	0	0.0073	0.0001	0	0.0073	0.0001	0	0.0154	0.0001	0	0.0057	BG
maker-4_B_2L-augustus-gene-41.62	0.0533	0.0176	0.3314	0.0001	0	0.0095	0.0797	0.0025	0.0317	0.0001	0	0.0091	0.017	0.0007	0.0386	BG
maker-3_A_X-snap-gene-33.193	0.1306	0.0571	0.4368	0.0889	0.0018	0.0204	0.0001	0	0.0146	0.1538	0.0036	0.0237	0.0172	0.0002	0.013	BG
augustus_masked-0_D_3L-processed-gene-2.3	0.0649	0.062	0.9546	0.0812	0.0012	0.0149	0.0001	0	0.0325	0.0526	0.0012	0.0231	0.0292	0.0012	0.0414	BG
maker-2_E_3R-augustus-gene-1.104	0.0219	0.0105	0.4784	0.0001	0	0.0396	0.0347	0.0005	0.0154	0.0001	0	0.0175	0.0001	0	0.0235	BG
maker-0_D_3L-augustus-gene-59.100	0.1456	0.08	0.5496	0.0803	0.001	0.0121	0.0765	0.0017	0.0222	0.2091	0.0025	0.0117	0.1017	0.003	0.029	BG
maker-3_A_X-augustus-gene-56.108	0.1601	0.0113	0.0703	0.0781	0.0005	0.0066	0.0001	0	0.0106	0.0709	0.0014	0.0191	0.0001	0	0.0278	BG
maker-1_C_2R-augustus-gene-23.115	0.0661	1.522	23.0201	0.0001	0	0.0133	0.6644	0.0035	0.0052	0.0001	0	0.0202	0.19	0.0017	0.0091	BG
maker-4_B_2L-augustus-gene-47.116	0.0717	0	0	0.419	0	0	0.312	0	0	0.213	0	0	0.0789	0	0	BG
maker-0_D_3L-augustus-gene-74.96	0.1731	3.2367	18.6989	0.0001	0	0.0124	0.0992	0.3915	3.9459	0.0001	0	0.0124	0.112	0.0174	0.1554	BG
maker-1_C_2R-augustus-gene-38.126	0.2789	9.1399	32.7763	0.7143	0.0082	0.0115	0.0001	0	0.0104	0.1524	0.0082	0.0537	0.0001	0	0.0296	BG
maker-0_D_3L-augustus-gene-20.88	0.3897	1.6201	4.1573	0.5312	0.0036	0.0068	0.6202	0.0016	0.0026	0.427	0.0051	0.0118	0.0968	0.0017	0.0172	BG
maker-2_E_3R-augustus-gene-74.13	0.272	0.1225	0.4503	0.716	0.0021	0.0029	0.1656	0.0028	0.017	1.5452	0.0044	0.0028	0.3981	0.0073	0.0184	BG
maker-1_C_2R-augustus-gene-19.129	0.1005	0.0388	0.3861	0.0001	0	0.0183	0.3474	0.0017	0.005	0.0872	0.0011	0.0132	0.5723	0	0	BG
augustus_masked-0_D_3L-processed-gene-25.10	0.3264	0.4058	1.2433	0.0001	0	0.0074	0.2329	0.0034	0.0144	0.0708	0.001	0.0148	0.1584	0.0037	0.0233	BG
maker-1_C_2R-augustus-gene-66.94	0.0174	1.038	59.6099	0.0001	0	0.0207	0.01	0.0003	0.0302	0.0001	0	0.0305	NA	NA	NA	BG
maker-3_A_X-augustus-gene-44.105	0.1981	6.434	32.4709	0.0001	0	0.0088	0.0001	0	0.017	0.057	0.0005	0.0087	0.0001	0	0.0253	BG
maker-2_E_3R-augustus-gene-90.82	0.2045	0.0872	0.4266	0.0001	0	0.0108	0.3203	0.0034	0.0105	0.3396	0	0	0.0001	0	0.0221	BG
maker-0_D_3L-snap-gene-21.123	0.0504	0.0097	0.192	0.0001	0	0	0.0001	0	0.0336	0.0001	0	0	0.0001	0	0.0226	BG
snap_masked-1_C_2R-processed-gene-69.67	0.0394	0.0141	0.3565	0.0001	0	0.0033	0.0001	0	0.0284	0.0001	0	0.0183	0.0001	0	0.0115	BG
maker-0_D_3L-augustus-gene-18.152	0.1188	0.0611	0.5141	0.0001	0	0.0137	0.0001	0	0	0.0001	0	0.0066	0.0001	0	0	BG
maker-1_C_2R-snap-gene-80.134	0.1125	0.233	2.0715	0.0001	0	0.0253	0.0001	0	0	0.0001	0	0.0426	0.0001	0	0	BG
maker-3_A_X-snap-gene-105.5	0.0248	0.0258	1.0413	0.0001	0	0	0.0001	0	0	0.0901	0	0	0.0001	0	0	BG
maker-0_D_3L-augustus-gene-70.102	0.6619	0.9712	1.4673	0.3494	0	0	0.29	0.0011	0.0038	0.2524	0	0	0.0001	0	0	BG
augustus_masked-1_C_2R-processed-gene-20.	0.2796	0.2723	0.9736	0.6869	0.0032	0.0046	0.0001	0	0	0.1161	0.0016	0.0138	0.0001	0	0	BG
maker-2_E_3R-snap-gene-65.12	0.0598	0.0302	0.5046	0.0001	0	0.0103	0.0001	0	0.0078	0.0488	0.0009	0.0189	0.9	0.0018	0.002	BG
maker-3_A_X-augustus-gene-51.67	0.0523	0.0191	0.3652	0.0001	0	0.0037	0.3316	0.0027	0.0082	0.0001	0	0.0175	0.0001	0	0.0168	BG
augustus_masked-0_D_3L-processed-gene-2.14	0.0581	0.0365	0.6283	0.0001	0	0.0153	0.0499	0.0021	0.0423	0.0001	0	0.0284	0.0001	0	0.0152	BG
maker-1_C_2R-augustus-gene-68.110	0.0476	2.8209	59.2559	0.0218	0.0007	0.03	0.0001	0	0	0.0001	0	0.0456	0.0001	0	0	BG
maker-2_E_3R-augustus-gene-38.168	0.1355	0.1341	0.9897	0.2859	0.0074	0.026	0.0001	0	0.0185	0.0997	0.0025	0.0248	0.1325	0.0025	0.0186	BG
maker-2_E_3R-augustus-gene-21.116	0.4139	0.2396	0.5789	0.2395	0.0031	0.013	0.7851	0.0119	0.0151	0.444	0.0077	0.0174	0.2146	0.0072	0.0337	BG
maker-2_E_3R-augustus-gene-3.70	0.121	0.0072	0.0596	0.1188	0.001	0.0087	0.108	0.0085	0.079	0.098	0.0012	0.012	0.108	0.0085	0.079	BG
augustus_masked-1_C_2R-processed-gene-15.22	0.1173	0.0814	0.6944	0.0541	0.001	0.0178	0.0965	0.0065	0.067	0.0813	0.0009	0.0117	0.0116	0.001	0.0856	BG
maker-0_D_3L-augustus-gene-89.3	0.0628	0.046	0.7329	0.125	0.0009	0.0069	0.0349	0.001	0.0274	0.3012	0.0017	0.0057	0.0246	0.0009	0.035	BG
maker-1_C_2R-augustus-gene-24.130	0.0952	0.0418	0.4385	0.0391	0.001	0.0251	0.0645	0.0004	0.0065	0.0297	0.0005	0.0181	0.2	0.0004	0.002	BG
maker-0_D_3L-augustus-gene-79.160	0.009	0	0	0.0001	0	0.0157	0.0001	0	0.0157	0.0001	0	0.1907	0.0001	0	0.0157	BG
snap_masked-0_D_3L-processed-gene-87.23	0.0522	0.0211	0.404	0.0349	0.0011	0.0303	0.03	0.0012	0.0392	0.031	0.0009	0.0296	0.0293	0.001	0.0346	BG
maker-3_A_X-augustus-gene-20.30	0.123	0.0572	0.4651	0.0259	0.0005	0.0175	0.0001	0	0	0.0773	0.0016	0.0205	0.0001	0	0	BG
snap_masked-2_E_3R-processed-gene-15.72	0.0992	0.0489	0.4933	0.045	0.0009	0.0203	0.0386	0.001	0.0268	0.0542	0.0014	0.0255	0.0986	0.0019	0.0198	BG
maker-2_E_3R-augustus-gene-26.109	0.3282	6.0487	18.4321	0.0001	0	0.0117	0.0001	0	0	0.0888	0.0011	0.0125	2.9742	0	0	BG
maker-4_B_2L-augustus-gene-9.87	0.0717	0.0508	0.7093	0.0001	0	0.0284	0.7109	0.0019	0.0027	0.0357	0.0009	0.0266	0.5707	0.0011	0.002	BG
maker-0_D_3L-snap-gene-80.125	0.4928	0.3366	0.6831	0.5344	0.0029	0.0055	0.1295	0.0019	0.0148	0.467	0.0058	0.0124	0.5633	0.0042	0.0074	BG
maker-4_B_2L-snap-gene-80.168	0.1286	0.0591	0.4594	0.36	0.0017	0.0046	0.0837	0.004	0.0474	0.1432	0.0019	0.0133	0.081	0.004	0.0493	BG
maker-2_E_3R-augustus-gene-80.70	0.7141	0.7396	1.0358	0.0616	0.0026	0.0421	0.6914	0.022	0.0319	0.123	0.0066	0.0537	0.3221	0.0196	0.0609	BG
maker-2_E_3R-augustus-gene-35.13	0.0292	0.0129	0.4432	0.0246	0.0007	0.0301	0.0001	0	0.0177	0.0001	0	0.0202	0.0001	0	0.0144	BG
snap_masked-1_C_2R-processed-gene-71.96	0.0758	0.0262	0.3455	0.3324	0	0	0.0001	0	0	0.3216	0	0	0.0001	0	0	BG
maker-4_B_2L-augustus-gene-52.110	0.0122	0.7521	61.5486	0.0001	0	0.0207	0.0133	0.0006	0.0464	0.0001	0	0.0273	0.0001	0	0.0619	BG
maker-1_C_2R-augustus-gene-40.164	0.161	0.1286	0.7991	0.3509	0	0	0.0001	0	0	0.074	0.0016	0.0221	0.4532	0.0048	0.0105	BG
maker-2_E_3R-augustus-gene-14.114	0.0623	3.7731	60.5707	0.0001	0	0.0161	0.0182	0.0002	0.0138	0.0403	0.0013	0.033	0.025	0.001	0.0396	BG
maker-2_E_3R-augustus-gene-51.148	0.0928	0.0474	0.5112	0.0629	0.001	0.0161	0.0409	0.0021	0.0511	0.0443	0.0011	0.0246	0.0287	0.0011	0.0376	BG
maker-1_C_2R-augustus-gene-61.98	0.1305	0.0898	0.688	0.0769	0.0017	0.0222	0.8	0.0016	0.002	2.45	0.0049	0.002	0.0001	0	0	BG
maker-3_A_X-augustus-gene-64.9	0.5611	3.8574	6.8743	0.6786	0.0027	0.004	0.3352	0.0125	0.0373	0.9149	0.0072	0.0079	0.3464	0.0086	0.0248	BG
maker-1_C_2R-augustus-gene-60.144	0.1503	0.0325	0.2164	0.0001	0	0.0267	0.0001	0	0	0.0001	0	0	0.0001	0	0	BG
maker-1_C_2R-snap-gene-6.94	0.1368	0.0685	0.5006	0.0136	0.0005	0.0403	0.4903	0.0072	0.0146	0.0272	0.0005	0.0185	0.0001	0	0.014	BG
augustus_masked-2_E_3R-processed-gene-10.9	0.0302	0.0106	0.3525	0.2964	0	0	0.1151	0.0009	0.0081	0.0001	0	0.019	0.065	0.0011	0.0163	BG
maker-2_E_3R-augustus-gene-59.183	0	0	0.119	NA	NA	NA	NA	NA	NA	NA	NA	NA	NA	NA	NA	BG
maker-4_B_2L-augustus-gene-21.132	0.0741	0.0008	0.0109	0.0354	0.0008	0.0214	0.0958	0.0049	0.0508	0.0001	0	0.0197	0.0958	0.0049	0.0508	BG
maker-0_D_3L-snap-gene-31.155	0.031	0.0083	0.2669	0.0339	0.0005	0.0139	0.0311	0.0009	0.03	0.0563	0.0009	0.0167	0.022	0.0009	0.0423	BG
maker-4_B_2L-augustus-gene-59.119	0.2254	0.1386	0.6146	0.3292	0.002	0.006	0.0001	0	0	0.0637	0.0015	0.0235	0.0001	0	0	BG
maker-4_B_2L-augustus-gene-30.104	0.037	0.0172	0.464	0.0001	0	0.0111	0.0943	0.0011	0.012	0.0001	0	0.0253	0.0001	0	0.0022	BG
maker-1_C_2R-augustus-gene-20.159	0.0489	0.0132	0.2711	0.0001	0	0.0055	0.8668	0	0	0.0001	0	0.0105	1.75	0.0035	0.002	BG
maker-3_A_X-snap-gene-83.34	0.0401	0.0135	0.337	0.0528	0.0009	0.0177	0.0498	0.0009	0.018	0.1	0.0002	0.002	0.0001	0	0.0263	BG
maker-1_C_2R-augustus-gene-18.87	0.0951	0.0384	0.4034	0.0001	0	0.0169	0.0001	0	0.0015	0.0932	0.001	0.0107	0.0649	0.001	0.0154	BG
snap_masked-1_C_2R-processed-gene-67.96	0.1132	5.2312	46.201	0.1779	0.0013	0.0074	0.0624	0.0013	0.0209	0.9507	0.0059	0.0062	0.0001	0	0.0353	BG
maker-3_A_X-snap-gene-101.90	1.3519	0.8016	0.593	0.1527	0.0025	0.0166	0.45	0.0009	0.002	1.1	0.0022	0.002	0.45	0.0009	0.002	BG
augustus_masked-4_B_2L-processed-gene-63.18	0.0331	0.0075	0.2276	0.0001	0	0	0.0001	0	0	0.0001	0	0.0101	0.0001	0	0.0169	BG
maker-0_D_3L-augustus-gene-71.10	0.3677	0.7594	2.0651	0.3665	0.01	0.0273	0.0001	0	0	0.7013	0.0104	0.0149	0.3026	0	0	BG
maker-3_A_X-augustus-gene-55.8	0.1513	6.7488	44.5934	0.0237	0.0001	0.0028	0.0345	0.0003	0.0085	0.1149	0.0009	0.0075	0.0448	0.0005	0.0117	BG
augustus_masked-4_B_2L-processed-gene-53.10	0.1128	0.0433	0.3839	0.2962	0	0	0.0001	0	0.0114	0.0001	0	0.0075	0.0822	0.0006	0.0075	BG
maker-3_A_X-augustus-gene-55.80	0.2592	0.1547	0.5969	0.0351	0.0005	0.0154	0.1855	0.0018	0.0099	0.1549	0.0023	0.0151	0.5135	0.0023	0.0044	BG
augustus_masked-2_E_3R-processed-gene-75.20	0.4156	0.2313	0.5564	0.0938	0.0037	0.0391	0.0001	0	0.0223	0.0562	0.0014	0.0249	0.0001	0	0.0196	BG
maker-4_B_2L-snap-gene-72.	0.7415	1.4137	1.9064	0.0001	0	0.0112	1.7	0.0034	0.002	2.7	0.0054	0.002	9.8528	0.006	0.0006	BG
snap_masked-0_D_3L-processed-gene-31.82	0.0326	1.8075	55.3877	0.0667	0.001	0.0144	0.0001	0	0.0236	0.0403	0.001	0.0238	0.0772	0.001	0.0125	BG
maker-4_B_2L-snap-gene-47.136	0.1241	0.0874	0.7042	0.0868	0.0012	0.0135	0.1256	0.0042	0.0333	0.2022	0.0029	0.0142	0.2636	0.005	0.019	BG
maker-0_D_3L-augustus-gene-3.53	0	0	0.1027	NA	NA	NA	NA	NA	NA	NA	NA	NA	NA	NA	NA	BG
maker-1_C_2R-augustus-gene-19.118	0.0579	0.0328	0.5672	0.1235	0.0006	0.0046	0.0289	0.0006	0.0191	0.0622	0.0011	0.0177	0.045	0.0011	0.0246	BG
maker-1_C_2R-augustus-gene-41.124	0.0741	0.0351	0.4737	0.0508	0.0012	0.0243	0.0001	0	0.0276	0.068	0.0018	0.0265	0.0144	0.0009	0.0647	BG
maker-2_E_3R-augustus-gene-5.138	0.0509	0.024	0.4718	0.0001	0	0.0246	0.0489	0.0013	0.027	0.0159	0.0006	0.0354	0.0312	0.0013	0.0411	BG
maker-4_B_2L-augustus-gene-29.94	0.025	1.4482	57.8534	0.3195	0	0	0.0001	0	0.0334	0.0001	0	0	0.0001	0	0.0136	BG
maker-0_D_3L-augustus-gene-80.93	0.0879	3.7052	42.1623	0.0244	0.0004	0.0149	0.0001	0	0.0098	0.0343	0.0008	0.0219	0.1467	0.0004	0.0027	BG
augustus_masked-0_D_3L-processed-gene-12.20	0.1004	0.0416	0.4142	0.1853	0.0038	0.0205	0.1378	0.0043	0.0312	0.1473	0.0077	0.0521	0.2186	0.0034	0.0154	BG
augustus_masked-0_D_3L-processed-gene-59.24	0.3156	0.1215	0.3849	0.4932	0	0	0.0001	0	0	0.412	0	0	0.0001	0	0.0189	BG
maker-2_E_3R-augustus-gene-2.90	0.0303	1.8268	60.2056	0.0278	0.0005	0.0193	0.0001	0	0.0065	0.0212	0.0005	0.0257	0.0001	0	0.0177	BG
maker-1_C_2R-augustus-gene-84.139	0.1918	0.0872	0.4548	0.2101	0.0014	0.0065	0.4329	0.0039	0.0089	0.1697	0.0027	0.0161	0.1388	0.0039	0.028	BG
maker-0_D_3L-augustus-gene-37.165	0.0106	0.7127	67.4363	0.2591	0	0	0.0001	0	0.015	0.0001	0	0.0151	0.0001	0	0	BG
maker-3_A_X-snap-gene-3.99	0.0371	2.043	55.1263	0.0481	0.0008	0.0162	0.0001	0	0.0035	0.0001	0	0.0235	0.0001	0	0.0051	BG
maker-4_B_2L-snap-gene-2.115	0.0482	0.0173	0.3582	0.0001	0	0.0279	0.0001	0	0.0596	0.0001	0	0.005	0.0001	0	0.0336	BG
maker-2_E_3R-snap-gene-82.163	0.414	1.5945	3.8516	0.547	0.1516	0.2771	0.0524	0.0018	0.0337	0.1303	0.007	0.0535	0.2252	0.0087	0.0386	BG
augustus_masked-1_C_2R-processed-gene-79.14	0.1351	0.026	0.1928	0.1942	0.0011	0.0058	0.1035	0.002	0.019	0.1412	0.0011	0.0079	0.0947	0.0018	0.0187	BG
maker-0_D_3L-augustus-gene-71.107	0.03	1.6871	56.2218	0.0001	0	0.0041	0.0001	0	0.0236	0.0001	0	0.0093	0.0001	0	0.0165	BG
maker-0_D_3L-snap-gene-35.176	0.1012	1.9356	19.1266	0.1441	0.0008	0.0053	0.0001	0	0.0206	0.0321	0.0004	0.0119	0.0001	0	0.0109	BG
maker-3_A_X-augustus-gene-44.129	0.0557	0.0177	0.3167	0.1411	0.0009	0.0066	0.0001	0	0.0166	0.0001	0	0.0107	0.0001	0	0.0161	BG
maker-3_A_X-snap-gene-23.114	0.0973	0.0522	0.5368	0.0001	0	0.0085	0.0116	0.0004	0.0373	0.0001	0	0.0202	0.0001	0	0.0268	BG
augustus_masked-2_E_3R-processed-gene-42.0	0.0652	3.3469	51.3509	0.0001	0	0.0047	0.0001	0	0.0154	0.0001	0	0.0047	0.0001	0	0	BG
maker-3_A_X-augustus-gene-12.26	0.2505	0.1504	0.6005	0.1931	0.0053	0.0276	0.0234	0.0008	0.0353	0.3989	0.0086	0.0216	0.1245	0.0033	0.0265	BG
maker-1_C_2R-snap-gene-53.7	0.0806	0.0427	0.5305	0.1847	0.0026	0.014	0.0733	0.0018	0.0243	0.2022	0.0043	0.0213	0.0347	0.0018	0.0507	BG
maker-0_D_3L-augustus-gene-11.112	0.0314	0.0073	0.2324	0.3171	0	0	0.3563	0	0	0.0001	0	0.017	0.5013	0	0	BG
snap_masked-2_E_3R-processed-gene-46.48	0.0943	2.378	25.2185	0.1148	0.001	0.0091	0.0533	0.0009	0.0161	0.1325	0.0028	0.0211	0.0533	0.0014	0.0259	BG
maker-0_D_3L-augustus-gene-15.180	0.115	0.0903	0.7848	0.0381	0.001	0.0271	0.0001	0	0	0.1618	0.0021	0.0127	0.2152	0.0017	0.008	BG
maker-4_B_2L-augustus-gene-38.103	0.0507	2.6773	52.8016	0.0001	0	0.0086	0.3	0.0006	0.002	0.1126	0.0006	0.0052	0.0001	0	0.0017	BG
maker-4_B_2L-augustus-gene-74.103	2.2186	4.768	2.1491	0.308	0	0	0.0514	0.4732	9.2009	0.304	0	0	2.6231	0.2324	0.0886	BG
maker-0_D_3L-augustus-gene-31.108	0.0452	0.0112	0.2475	0.0001	0	0	0.0542	0.0009	0.0172	0.0001	0	0.0501	0.0001	0	0.0432	BG
maker-2_E_3R-augustus-gene-61.113	0.1292	3.5392	27.3857	0.0001	0	0.0027	0.0001	0	0.0431	0.0001	0	0.0027	0.0001	0	0.0431	BG
maker-2_E_3R-augustus-gene-75.104	0.0613	0.0108	0.1769	0.0001	0	0.0139	0.0001	0	0.0104	0.0407	0.0008	0.0188	0.0771	0.0014	0.0186	BG
maker-4_B_2L-augustus-gene-43.92	0.242	9.3518	38.6422	0.0001	0	0	0.0001	0	0	0.464	0.0346	0.0745	0.3091	0.0034	0.011	BG
maker-4_B_2L-augustus-gene-52.118	0.1667	0.0947	0.5678	0.1712	0.003	0.0175	0.0699	0.0024	0.0337	0.2478	0.0051	0.0207	0.3136	0.0045	0.0145	BG
maker-2_E_3R-augustus-gene-1.106	0.0151	0.9242	61.3667	0.0001	0	0.0111	0.0001	0	0.0236	0.0409	0.0004	0.0107	0.0001	0	0.0269	BG
augustus_masked-3_A_X-processed-gene-59.	0.0733	0.0473	0.645	0.0001	0	0.015	0.0001	0	0.0506	0.1435	0.0017	0.012	0.0505	0.0017	0.0339	BG
maker-1_C_2R-augustus-gene-59.102	0.1192	0.0477	0.3998	0.0001	0	0	0.0001	0	0	0.0001	0	0	0.0001	0	0	BG
maker-1_C_2R-augustus-gene-73.	0.1673	0.1115	0.6669	0.1307	0.0079	0.0608	0.0409	0.0015	0.0372	0.2193	0.0065	0.0299	0.1444	0.0086	0.0594	BG
maker-2_E_3R-augustus-gene-98.88	0.0632	1.3852	21.9101	0.0001	0	0	0.05	0.0001	0.002	0.074	0.0029	0.0395	0.0938	0.0027	0.0287	BG
maker-5_U_U-augustus-gene-20.69	0.0455	2.653	58.292	0.3704	0	0	0.0001	0	0	0.85	0.0017	0.002	0.0001	0	0	BG
maker-3_A_X-augustus-gene-2.102	0.0959	0.058	0.6046	0.0001	0	0.0172	0.0001	0	0.0151	0.0001	0	0.0085	0.0001	0	0.0112	BG
maker-4_B_2L-snap-gene-82.122	0.2774	0.0687	0.2475	0.8316	0.0042	0.005	0.0843	0.0027	0.0323	15.5275	0.0511	0.0033	0.2357	0.0043	0.0181	BG
maker-2_E_3R-augustus-gene-13.96	0.0356	2.032	57.1523	0.0695	0.0011	0.0153	0.1056	0.0017	0.0164	0.0263	0.0005	0.0202	0.101	0.0012	0.0122	BG
maker-0_D_3L-augustus-gene-27.112	0.4583	0.4286	0.9351	1.4742	0.0031	0.0021	0.243	0.0185	0.076	0.3328	0.0064	0.0193	0.3032	0.0125	0.0411	BG
maker-0_D_3L-augustus-gene-83.73	0.0265	1.1543	43.4951	0.0001	0	0.0225	0.0001	0	0.0344	0.0001	0	0.026	0.95	0.0019	0.002	BG
snap_masked-0_D_3L-processed-gene-70.82	0.1558	0.0655	0.4207	0.1606	0.0015	0.0095	0.0873	0.002	0.0234	0.1909	0.0029	0.0151	0.0697	0.0014	0.0206	BG
snap_masked-2_E_3R-processed-gene-6.52	0.5529	0.9659	1.747	0.0001	0	0	0.0001	0	0.0089	0.3302	0	0	0.3905	0	0	BG
maker-3_A_X-augustus-gene-11.57	0.065	0.1483	2.2821	0.1476	0.0025	0.0171	0.0625	0.0017	0.0267	0.0747	0.0025	0.0339	0.0001	0	0.0068	BG
maker-3_A_X-augustus-gene-98.44	0.4383	0.6933	1.5819	0.5711	0.0092	0.016	0.0001	0	0.0033	0.5485	0.0042	0.0077	0.2991	0.001	0.0035	BG
snap_masked-2_E_3R-processed-gene-27.35	0.0726	0.0377	0.5193	0.0775	0.0014	0.0187	0.0001	0	0.0008	0.0376	0.0007	0.0198	6.0982	0.001	0.0002	BG
maker-0_D_3L-augustus-gene-27.108	0.1746	0.0904	0.5177	0.0496	0.0012	0.0246	0.0324	0.0011	0.0339	2.5	0.005	0.002	0.0785	0.0012	0.0153	BG
maker-4_B_2L-snap-gene-39.103	0.131	0.0658	0.5022	0.3273	0.0013	0.0038	0.2587	0.0019	0.0072	0.0001	0	0.0038	0.1209	0.0025	0.0208	BG
maker-2_E_3R-snap-gene-93.9	0.0582	0.0003	0.0046	0.0001	0	0.0071	0.0001	0	0	0.0001	0	0	0.0001	0	0	BG
maker-3_A_X-snap-gene-25.113	0.0258	1.5004	58.2169	0.0651	0.0005	0.0076	0.0001	0	0.0047	0.0001	0	0.0074	0.0001	0	0.0015	BG
maker-3_A_X-snap-gene-18.90	0.061	0.0301	0.4936	0.2754	0	0	0.0001	0	0	0.1672	0	0	0.0001	0	0	BG
maker-2_E_3R-augustus-gene-45.88	0.1137	2.2595	19.8663	0.0766	0.0015	0.0195	0.3013	0.0019	0.0063	0.0197	0.0005	0.0251	0.1057	0.0019	0.0182	BG
snap_masked-4_B_2L-processed-gene-12.40	0.1376	0.1202	0.8733	0.0982	0.0016	0.0159	0.0719	0.0023	0.0326	0.0447	0.0014	0.0305	0.0898	0.0031	0.0341	BG
maker-2_E_3R-augustus-gene-21.124	0.6819	0.8521	1.2496	0.2176	0.0042	0.0192	0.0001	0	0	0.0001	0	0.0289	0.1467	0.0026	0.0175	BG
maker-2_E_3R-augustus-gene-5.120	0.2438	0.1558	0.6388	0.0001	0	0.0051	0.0559	0.0017	0.0298	0.0731	0.0022	0.0302	0.2039	0.004	0.0198	BG
maker-1_C_2R-augustus-gene-13.108	0.2537	2.4422	9.627	0.447	0.0087	0.0195	0.0916	0.0009	0.0096	0.0283	0.0004	0.0156	0.0634	0.0004	0.0064	BG
maker-2_E_3R-augustus-gene-100.85	0.1567	0.097	0.6191	0.1213	0.0026	0.0212	0.117	0.0067	0.0572	0.1541	0.0049	0.032	0.1665	0.0077	0.0461	BG
maker-4_B_2L-snap-gene-39.98	0.1433	0.0706	0.493	0.2014	0.0018	0.0089	0.1849	0.0053	0.0289	0.1054	0.0018	0.0167	0.236	0.0061	0.0257	BG
maker-1_C_2R-snap-gene-11.117	0.2239	0.0174	0.0777	0.3268	0	0	0.0001	0	0.0047	0.0001	0	0.0051	0.0001	0	0.0094	BG
maker-1_C_2R-augustus-gene-39.164	0.0279	0.0142	0.5074	0.0192	0.001	0.0538	0.0001	0	0.0664	0.0001	0	0.0211	0.0132	0.001	0.078	BG
augustus_masked-2_E_3R-processed-gene-91.7	0.0289	1.7182	59.5094	0.018	0.0006	0.0356	0.023	0.001	0.0456	0.0001	0	0.0274	0.011	0.0005	0.0439	BG
maker-2_E_3R-augustus-gene-17.114	0.0401	2.1631	53.8853	0.0001	0	0.0338	0.0326	0.001	0.0305	0.0001	0	0.0247	0.0001	0	0.0447	BG
maker-4_B_2L-augustus-gene-15.65	0.5546	0.8241	1.4858	0.2699	0.0009	0.0034	0.2756	0.0041	0.0149	0.3008	0.002	0.0068	1.9127	0.0082	0.0043	BG
maker-0_D_3L-snap-gene-72.125	0.0517	2.8124	54.3704	0.0316	0.0004	0.0127	0.0259	0.0012	0.0477	0.014	0.0004	0.0286	0.0218	0.0008	0.0368	BG
maker-1_C_2R-snap-gene-52.94	0.0466	0.0232	0.4974	0.0496	0.0005	0.0104	0.0098	0.0005	0.0532	0.0333	0.0005	0.0155	0.0084	0.0004	0.0458	BG
snap_masked-4_B_2L-processed-gene-34.109	0.2335	0.1195	0.5117	0.2383	0.0037	0.0157	0.1074	0.0018	0.0167	0.2878	0.0086	0.0299	0.4598	0.0043	0.0093	BG
augustus_masked-2_E_3R-processed-gene-97.15	0.0982	0.067	0.683	0.1963	0.0027	0.0139	0.0001	0	0	0.074	0.0012	0.0159	0.0001	0	0	BG
maker-0_D_3L-augustus-gene-28.79	0.9739	0	0	0.1755	0.0017	0.0098	0.1744	0.0192	0.11	2.55	0.0051	0.002	NA	NA	NA	BG
maker-1_C_2R-snap-gene-57.128	0.0753	3.8188	50.7298	0.0001	0	0.0181	0.048	0.0009	0.0179	0.0387	0.0009	0.0221	0.256	0.0026	0.01	BG
maker-1_C_2R-augustus-gene-11.87	0.0994	0.0232	0.2335	0.0001	0	0.0045	0.0001	0	0.0067	0.2412	0.005	0.0208	0.0001	0	0.0133	BG
maker-4_B_2L-augustus-gene-94.47	0.4397	0.4304	0.9787	4.25	0.0085	0.002	4.25	0.0085	0.002	0.0104	0.675	65.1156	0.9812	0.0093	0.0095	BG
maker-5_U_U-augustus-gene-20.60	0.0755	0.0626	0.8291	0.0001	0	0.0139	0.0001	0	0	0.0219	0.0007	0.0307	0.0001	0	0	BG
maker-3_A_X-augustus-gene-74.7	0.0338	0.0069	0.2033	0.0001	0	0	0.0001	0	0.0368	0.0001	0	0.0279	0.0001	0	0.0362	BG
maker-0_D_3L-snap-gene-88.110	0.0862	0.0525	0.6091	0.1042	0.0013	0.0122	0.0283	0.0008	0.0299	0.1867	0.0032	0.017	0.023	0.0008	0.0369	BG
snap_masked-3_A_X-processed-gene-86.15	0.0461	2.6273	56.9734	0.0422	0.0031	0.0729	0.0159	0.001	0.0617	0.0847	0.0023	0.027	0.0587	0.002	0.0333	BG
maker-2_E_3R-snap-gene-45.105	0.1034	0.0248	0.2402	0.0721	0.0006	0.0079	0.0502	0.0006	0.0125	0.0001	0	0.0116	0.0001	0	0.0109	BG
maker-0_D_3L-augustus-gene-36.137	0.0582	0.0171	0.2932	0.0733	0.0009	0.0127	0.0001	0	0	0.0403	0.0015	0.0368	0.0001	0	0	BG
maker-2_E_3R-augustus-gene-38.154	0.735	1.0819	1.472	0.0001	0	0.0131	0.0001	0	0	0.0001	0	0.0043	0.0001	0	0.0041	BG
maker-4_B_2L-augustus-gene-46.100	3.0741	6.5528	2.1316	0.0374	0.0016	0.0431	0.0001	0	0	0.0001	0	0.0182	0.0001	0	0	BG
maker-4_B_2L-augustus-gene-80.	0.1818	0.1353	0.744	0.1947	0.0051	0.0263	0.0669	0.0054	0.0801	0.4543	0.0056	0.0123	0.1028	0.0053	0.0513	BG
maker-2_E_3R-augustus-gene-35.119	0.0163	0.9974	61.1449	0.0001	0	0.0394	0.0001	0	0.0105	0.0001	0	0.0186	0.0001	0	0.016	BG
maker-1_C_2R-augustus-gene-13.12	0.0697	0.0371	0.5332	0.0451	0.0009	0.0192	0.0001	0	0	0.0911	0.0012	0.0129	0.0001	0	0	BG
augustus_masked-3_A_X-processed-gene-44.14	0.0336	0.0118	0.351	0.0001	0	0.0028	0.0001	0	0.0138	0.0001	0	0.0109	0.0001	0	0.0142	BG
maker-0_D_3L-augustus-gene-6.7	0.3017	0.2009	0.6658	0.3261	0.0024	0.0072	0.062	0.0018	0.0283	0.2811	0.0023	0.0083	0.2469	0.0035	0.0141	BG
maker-3_A_X-augustus-gene-4.58	0.083	0.0381	0.4585	0.1532	0.0018	0.012	0.0001	0	0.0289	0.0932	0.0014	0.0147	0.0536	0.0015	0.0284	BG
maker-0_D_3L-augustus-gene-76.84	0.0564	0.0355	0.6283	0.0322	0.0006	0.0178	0.0204	0.0009	0.0444	0.0182	0.0003	0.0158	0.0396	0.0013	0.0341	BG
maker-2_E_3R-augustus-gene-37.120	0.0945	0	0	0.0001	0	0.0196	0.8267	0.0071	0.0086	0.0437	0.0007	0.017	0.8191	0.0071	0.0086	BG
maker-1_C_2R-snap-gene-46.154	0.1195	0.029	0.2427	0.0001	0	0	0.3835	0.0026	0.0068	0.0694	0.0006	0.0087	0.2275	0.0012	0.0052	BG
maker-0_D_3L-augustus-gene-53.117	0.0451	0.1247	2.7673	9.45	0.0189	0.002	0.2016	0.3885	1.9272	0.0001	0	0.0779	0.8512	0.0319	0.0375	BG
maker-0_D_3L-snap-gene-69.105	0.0906	0.0324	0.3573	0.0001	0	0.0081	0.0001	0	0.0364	0.0001	0	0.0227	0.0146	0.0005	0.0338	BG
maker-1_C_2R-snap-gene-68.12	0.0256	0.0068	0.264	0.1103	0.0005	0.0049	0.0001	0	0	0.1243	0.0005	0.0044	0.0001	0	0	BG
maker-2_E_3R-augustus-gene-33.123	0.2105	0.1079	0.5123	0.75	0.0015	0.002	0.0001	0	0.0416	0.182	0.0015	0.0082	0.0001	0	0.0122	BG
maker-2_E_3R-augustus-gene-75.100	0.1123	0.039	0.3472	0.0001	0	0.0102	0.896	0.0045	0.005	0.0001	0	0.0057	0.0001	0	0.0105	BG
maker-0_D_3L-snap-gene-81.102	0.0205	1.1268	54.8689	0.2314	0	0	0.0001	0	0.0169	0.1906	0.0011	0.006	0.0001	0	0.0091	BG
maker-1_C_2R-augustus-gene-46.13	0.0337	0.0029	0.0851	0.0551	0.0002	0.0042	0.0001	0	0.0216	0.0001	0	0.0031	0.016	0.0002	0.0152	BG
maker-1_C_2R-augustus-gene-11.9	0.0498	2.387	47.9317	0.1979	0.0025	0.0124	0.0001	0	0.0268	0.102	0.0016	0.0161	0.0001	0	0.0321	BG
snap_masked-1_C_2R-processed-gene-80.70	0.0657	2.5962	39.5297	0.006	0.0001	0.0179	0.513	0.0019	0.0037	0.0001	0	0.0318	0.0142	0.0003	0.0191	BG
augustus_masked-1_C_2R-processed-gene-43.3	0.0392	1.9623	50.1212	0.0001	0	0.0105	0.0663	0.0017	0.0254	0.0001	0	0.0293	0.0001	0	0.0185	BG
maker-1_C_2R-snap-gene-8.185	0.11	0.0893	0.8117	0.121	0.0025	0.0209	0.0505	0.0025	0.0505	0.0754	0.0017	0.0223	0.0001	0	0.0368	BG
maker-1_C_2R-augustus-gene-20.133	0.074	0.0208	0.2813	0.0001	0	0.0154	0.0001	0	0.0267	0.0001	0	0	0.0001	0	0.027	BG
maker-2_E_3R-augustus-gene-95.62	0.1774	0.0927	0.5224	0.2049	0.0017	0.0084	0.0821	0.0023	0.0274	0.0001	0	0.012	0.0236	0.0009	0.0395	BG
maker-0_D_3L-augustus-gene-5.84	0.1994	0.0188	0.0942	0.0312	0.0027	0.0874	0.4598	0.0128	0.0278	0.0001	0	0.0823	6.05	0.0121	0.002	BG
augustus_masked-1_C_2R-processed-gene-79.3	0.1195	0.013	0.1084	0.0001	0	0	0.0001	0	0	0.0332	0.0014	0.0408	0.0001	0	0.002	BG
maker-1_C_2R-augustus-gene-62.95	0.2059	0.0396	0.1924	0.9827	0.1238	0.126	0.0001	0	0.0168	0.0001	0	0	0.0001	0	0.0455	BG
maker-3_A_X-augustus-gene-36.60	0.1071	0.0257	0.2396	0.0001	0	0.0083	0.0001	0	0	0.0001	0	0.0057	0.0001	0	0	BG
maker-4_B_2L-augustus-gene-27.46	0.026	1.5617	60.1596	0.1508	0.0028	0.0187	0.0001	0	0.0363	0.1252	0.0029	0.023	0.0001	0	0.0576	BG
snap_masked-0_D_3L-processed-gene-27.68	0.1104	0.0511	0.4627	0.0001	0	0.0087	0.3867	0.0037	0.0096	0.3566	0.0038	0.0105	0.2703	0	0	BG
maker-3_A_X-augustus-gene-10.42	0.0639	0.059	0.9236	0.0001	0	0.0428	0.0001	0	0.028	0.1884	0.0015	0.008	0.1035	0.003	0.029	BG
maker-2_E_3R-augustus-gene-61.118	0.1905	0.0964	0.5061	0.0766	0.003	0.0393	0.0861	0.0056	0.0653	0.1063	0.0037	0.0344	0.0609	0.0056	0.0923	BG
maker-2_E_3R-augustus-gene-86.108	0.5022	0.544	1.0832	1.3834	0.0035	0.0025	0.0909	0.0007	0.0082	0.0001	0	0.0022	0.0453	0.0008	0.0168	BG
maker-1_C_2R-augustus-gene-48.8	0.1368	0.0227	0.1657	0.0001	0	0.0027	0.4266	0.1643	0.385	0.8978	0.0018	0.002	0.0394	0.0018	0.0444	BG
maker-0_D_3L-augustus-gene-35.148	0.328	0.2602	0.7931	0.4194	0	0	0.2308	0	0	0.2684	0	0	0.2151	0	0	BG
snap_masked-0_D_3L-processed-gene-18.84	0.2465	0.0602	0.2443	0.0001	0	0.0163	0.4673	0	0	0.0001	0	0.0165	0.3772	0	0	BG
maker-3_A_X-snap-gene-19.89	0.0719	1.3746	19.1063	0.0001	0	0.0068	0.0001	0	0	0.0434	0.0007	0.0168	0.0001	0	0	BG
maker-0_D_3L-augustus-gene-20.87	0.0852	0.0278	0.3266	0.5454	0.0007	0.0013	0.2567	0.005	0.0194	0.1492	0.0017	0.0112	0.3871	0.0012	0.0031	BG
augustus_masked-2_E_3R-processed-gene-106.	0.0338	1.9309	57.11	0.3559	0.0011	0.003	0.0001	0	0.0271	0.0001	0	0.0127	0.0001	0	0.0066	BG
maker-1_C_2R-augustus-gene-5.	0.1753	0.0872	0.4973	0.0001	0	0.0065	0.0001	0	0	0.0163	0.0007	0.0431	0.3089	0	0	BG
augustus_masked-0_D_3L-processed-gene-73.0	0.0391	0.0234	0.5985	0.0001	0	0.0155	0.0411	0.0009	0.0223	0.0529	0.0011	0.0211	0.1219	0.0032	0.026	BG
maker-4_B_2L-augustus-gene-41.75	0.3902	0.1445	0.3704	0.1951	0	0	1.5	0.003	0.002	0.2539	0	0	0.0238	0.0008	0.032	BG
maker-1_C_2R-augustus-gene-20.148	0.3325	0.1915	0.5758	0.1969	0.0016	0.008	0.0001	0	0	0.1847	0.0016	0.0088	3.8028	0	0	BG
maker-0_D_3L-snap-gene-15.242	0.1844	0.0037	0.0199	0.0001	0	0.008	0.0001	0	0.008	0.0749	0.0053	0.0706	0.0001	0	0.008	BG
maker-2_E_3R-augustus-gene-82.107	0.0637	0.0268	0.4205	0.0001	0	0	0.0001	0	0.0892	0.0837	0.0028	0.0341	0.0173	0.0009	0.0543	BG
maker-1_C_2R-augustus-gene-70.127	0.1135	0.0438	0.3862	0.1363	0.0009	0.0068	0.0587	0.0019	0.0315	0.1044	0.0019	0.0178	0.0427	0.0009	0.0218	BG
maker-3_A_X-snap-gene-58.122	0.0857	0.0279	0.326	0.0001	0	0.0069	0.0359	0.001	0.0283	0.0001	0	0.0259	0.0001	0	0.0205	BG
maker-3_A_X-snap-gene-23.133	0.15	0.091	0.6065	0.0001	0	0.0129	0.0001	0	0	0.0001	0	0.0016	0.0001	0	0	BG
maker-0_D_3L-augustus-gene-32.58	0.0411	0.0195	0.4752	0.0001	0	0.0165	0.0001	0	0.0561	0.0292	0.0007	0.0233	0.0001	0	0.0495	BG
maker-5_U_U-augustus-gene-9.0	0.0195	0.0178	0.9148	0.0001	0	0.0057	0.0347	0.0021	0.0598	0.0001	0	0.0081	0.0001	0	0.0263	BG
maker-0_D_3L-augustus-gene-83.7	0.2269	0.1141	0.5027	0.0001	0	0.0019	0.0452	0.0017	0.0379	0.0678	0.0028	0.0413	0.0723	0.0035	0.0488	BG
maker-3_A_X-snap-gene-78.112	0.1858	0.0966	0.5199	0.1242	0.1053	0.848	0.0001	0	0.013	0.1719	0.0085	0.0496	0.0001	0	0.0114	BG
maker-4_B_2L-augustus-gene-62.10	0.059	0.0196	0.3329	1.3177	0	0	0.0001	0	0.0098	0.0001	0	0.0205	0.0001	0	0.0219	BG
maker-5_U_U-snap-gene-2.25	0.3301	0.3051	0.9244	0.1444	0.0024	0.0168	0.2532	0.0082	0.0323	0.2596	0.0042	0.0161	0.1277	0.005	0.0389	BG
snap_masked-1_C_2R-processed-gene-78.18	0.0111	0.0031	0.2834	0.0001	0	0.0192	0.0001	0	0	0.0025	0.0001	0.0267	0.0001	0	0	BG
maker-4_B_2L-augustus-gene-2.94	0.056	1.9327	34.4825	0.1272	0.0015	0.0115	0.3261	0.0014	0.0042	0.0001	0	0.0263	0.0001	0	0.02	BG
maker-0_D_3L-augustus-gene-59.97	0.1036	0.0297	0.2871	0.0001	0	0.0114	0.0348	0.0009	0.0254	0.0766	0.0016	0.0206	0.0255	0.0009	0.0345	BG
maker-0_D_3L-snap-gene-1.97	0.0942	0.0316	0.335	0.0001	0	0.0071	0.0001	0	0.003	0.0488	0.0006	0.0115	0.0001	0	0	BG
snap_masked-3_A_X-processed-gene-45.55	0.2268	0.0031	0.0138	0.0001	0	0.0065	0.2972	0.0058	0.0194	0.155	0.001	0.0066	0.2972	0.0058	0.0194	BG
augustus_masked-0_D_3L-processed-gene-84.6	0.0938	0.0465	0.4956	0.0001	0	0.0058	0.2381	0.0032	0.0136	0.0001	0	0.0082	0.0001	0	0.0242	BG
augustus_masked-0_D_3L-processed-gene-76.4	0.0144	0.5583	38.7894	0.0001	0	0.0255	0.0001	0	0.0135	0.0001	0	0.0256	0.0001	0	0.0135	BG
augustus_masked-1_C_2R-processed-gene-27.12	0.3356	0.3049	0.9085	0.2111	0.0119	0.0562	0.1855	0.0026	0.0141	0.2212	0.0041	0.0183	0.498	0.0078	0.0157	BG
maker-2_E_3R-augustus-gene-12.63	0.0366	0	0	0.0001	0	0.1437	0.0001	0	0.1427	0.1267	0.3368	2.6587	0.0001	0	0.1427	BG
maker-1_C_2R-augustus-gene-28.85	0.3481	0.2046	0.5878	0.2737	0	0	0.6494	0.0111	0.0171	1.85	0.0037	0.002	11.5022	0.0087	0.0008	BG
maker-0_D_3L-augustus-gene-27.13	0.8341	0.7857	0.942	1.8	0.0036	0.002	0.0001	0	0	1.4939	0.0191	0.0128	0.0001	0	0.0261	BG
maker-1_C_2R-snap-gene-57.132	0.2843	0.2565	0.9022	0.1152	0.0016	0.0137	0.1239	0.0008	0.0065	0.0505	0.0009	0.0178	0.0661	0.0008	0.0119	BG
maker-3_A_X-snap-gene-14.106	0.1158	0.0303	0.2613	0.0001	0	0.0153	0.1398	0.0034	0.024	0.0775	0.0013	0.0173	0.0397	0.0004	0.0099	BG
maker-3_A_X-augustus-gene-3.74	0.1414	6.0398	42.7041	0.4106	0	0	0.2994	0.0054	0.0181	0.2129	0	0	0.0001	0	0	BG
maker-1_C_2R-augustus-gene-44.128	0.2167	8.4138	38.8245	0.3178	0.0019	0.0059	0.0001	0	0.0262	0.2266	0.002	0.0089	0.0001	0	0.022	BG
maker-3_A_X-augustus-gene-62.72	0.985	0.3559	0.3613	0.4703	0	0	0.8556	0	0	0.488	0	0	0.0001	0	0.0094	BG
maker-4_B_2L-augustus-gene-12.50	0.0497	0.0239	0.4821	0.3284	0	0	0.1446	0.0038	0.026	0.0001	0	0.0055	0.0001	0	0.0198	BG
maker-2_E_3R-augustus-gene-50.98	0.1873	0.0086	0.0459	0.1654	0.0015	0.009	0.12	0.0156	0.1301	0.1993	0.0015	0.0074	0.12	0.0156	0.1301	BG
maker-3_A_X-snap-gene-7.99	0.1266	0.0654	0.5169	0.08	0.0015	0.0183	0.0001	0	0.0486	0.1331	0.0023	0.0176	0.0001	0	0.037	BG
maker-3_A_X-augustus-gene-61.85	0.0145	0.8069	55.774	0.3024	0	0	0.0001	0	0.0165	0.0001	0	0.0076	0.0001	0	0.0151	BG
maker-1_C_2R-augustus-gene-45.108	0.1652	0.067	0.4058	1.7109	0	0	0.2429	0.0023	0.0093	0.511	0.0056	0.0109	0.0001	0	0.0261	BG
augustus_masked-2_E_3R-processed-gene-25.8	0.0478	1.3941	29.1432	0.6367	0.0011	0.0017	0.0692	0.0006	0.0089	0.0388	0.0005	0.0116	0.0001	0	0.0186	BG
snap_masked-4_B_2L-processed-gene-87.19	0.2362	9.4262	39.8991	2	0.004	0.002	0.0001	0	0.0208	0.2138	0.0042	0.0194	0.0001	0	0.0352	BG
maker-2_E_3R-augustus-gene-62.12	0.083	0.03	0.3613	0.0203	0.0003	0.0135	0.0466	0.0008	0.0168	0.0001	0	0.011	0.0566	0.001	0.0184	BG
maker-6_F_4-augustus-gene-3.73	0.156	0.1089	0.6982	0.4076	0	0	0.0001	0	0.0032	0.533	0	0	0.0001	0	0	BG
maker-4_B_2L-snap-gene-28.10	0.0161	0.9822	61.044	0.0001	0	0.0105	0.0114	0.0009	0.0778	0.0001	0	0.0117	0.0171	0.0009	0.0515	BG
maker-1_C_2R-augustus-gene-71.162	0.2058	0.091	0.4424	0.4274	0.0059	0.0139	0.0001	0	0.018	0.1396	0.0024	0.0171	0.0001	0	0.0312	BG
maker-4_B_2L-augustus-gene-92.59	0.0318	0.0126	0.3962	0.0001	0	0.0257	0.0001	0	0.0247	0.0001	0	0.0393	0.0001	0	0.041	BG
maker-1_C_2R-augustus-gene-50.84	0.0458	0.0202	0.4405	0.0001	0	0.0066	0.0001	0	0	0.0479	0.001	0.0208	0.0001	0	0	BG
maker-0_D_3L-augustus-gene-85.97	0.0341	0.2864	8.4072	0.0001	0	0.019	0.2596	0.0037	0.0143	0.0001	0	0.0181	0.0001	0	0.0216	BG
maker-2_E_3R-augustus-gene-2.94	0.3412	0.0216	0.0632	0.3675	0	0	1.6	0.0032	0.002	3.6	0.0072	0.002	0.0001	0	0	BG
maker-3_A_X-augustus-gene-21.67	0.0067	0.001	0.1454	0.0001	0	0.0199	0.369	0	0	0.0001	0	0.0052	0.3	0	0	BG
maker-4_B_2L-augustus-gene-25.42	0.5815	3.8206	6.5706	0.1598	0.0028	0.0178	1.5	0.003	0.002	0.178	0.003	0.0168	0.132	0.0031	0.0232	BG
maker-1_C_2R-snap-gene-9.217	0.3226	1.8203	5.6434	0.3111	0.0039	0.0124	0.1918	0.0021	0.0108	0.3339	0.0028	0.0084	0.1513	0.0021	0.014	BG
maker-2_E_3R-augustus-gene-17.95	0.2393	0.1396	0.5833	0.6842	0.0109	0.0159	0.3104	0.0018	0.0058	0.9	0.0018	0.002	0.0001	0	0.0056	BG
maker-2_E_3R-augustus-gene-5.127	0.0959	5.0574	52.7525	0.0001	0	0.0048	0.0001	0	0.0068	0.0001	0	0.0098	0.0001	0	0.0199	BG
maker-2_E_3R-augustus-gene-72.63	0.0138	0.8989	65.1223	0.0001	0	0.0185	0.0001	0	0.0245	0.0001	0	0.0218	0.0001	0	0.0432	BG
augustus_masked-4_B_2L-processed-gene-18.30	0.0228	0.0003	0.0148	0.291	0	0	0.0001	0	0	0.402	0	0	0.0001	0	0.0157	BG
maker-2_E_3R-snap-gene-13.123	0.2149	1.7974	8.3654	0.2998	0.0013	0.0043	0.2459	0.0015	0.006	0.117	0.0024	0.0207	0.2294	0.0011	0.0047	BG
maker-1_C_2R-snap-gene-45.124	0.1892	0.0164	0.0867	0.3837	0	0	1.45	0.0029	0.002	0.4463	0.0027	0.006	0.332	0.0011	0.0034	BG
maker-2_E_3R-augustus-gene-71.118	0.1799	0.0915	0.5085	0.0001	0	0.0302	0.0001	0	0.0119	0.3047	0.0037	0.0121	0.0471	0.0038	0.0802	BG
maker-4_B_2L-augustus-gene-14.56	0.6309	0.8744	1.3859	0.3092	0	0	0.0001	0	0.0036	0.0001	0	0.0035	0.0001	0	0.0036	BG
augustus_masked-0_D_3L-processed-gene-11.16	0.026	0.0168	0.6473	0.0001	0	0.0043	0.0001	0	0.0192	0.0283	0.0005	0.0179	0.0456	0.0014	0.0302	BG
maker-1_C_2R-augustus-gene-82.106	0.0827	0.0308	0.3719	0.0001	0	0.0108	0.2638	0.0024	0.0092	0.0487	0.0013	0.0272	0.0904	0.0011	0.0123	BG
maker-3_A_X-augustus-gene-92.64	0.0107	0.6877	64.4995	0.4389	0	0	0.3264	0	0	0.0001	0	0.0131	0.0749	0	0	BG
maker-2_E_3R-augustus-gene-62.103	0.0135	0.0042	0.3106	0.0001	0	0.0077	0.0001	0	0.0078	0.2866	0	0	0.0001	0	0.0156	BG
maker-2_E_3R-augustus-gene-31.5	0.0832	0.0012	0.015	0.0001	0	0.0072	0.0001	0	0.013	0.0001	0	0	0.0001	0	0.0093	BG
maker-0_D_3L-snap-gene-71.127	0.0329	1.7892	54.3375	0.0001	0	0.0016	0.1013	0.0012	0.0122	0.0001	0	0.0092	0.0541	0.0012	0.0229	BG
maker-1_C_2R-snap-gene-59.136	0.0233	0.0053	0.2278	0.0001	0	0.0213	0.0001	0	0	0.0001	0	0.0194	0.0001	0	0	BG
maker-1_C_2R-snap-gene-37.144	0.3333	1.6728	5.0182	0.2959	0.0028	0.0094	0.2244	0.0025	0.0112	0.2981	0.0033	0.0111	0.8725	0.0025	0.0028	BG
maker-3_A_X-augustus-gene-61.77	0.0603	0.002	0.0335	0.0001	0	0	0.0001	0	0	0.015	0.0007	0.0487	0.0001	0	0	BG
maker-2_E_3R-augustus-gene-98.90	0.0246	1.5123	61.3539	0.0001	0	0.0058	0.0001	0	0	0.0001	0	0.0121	0.0001	0	0	BG
maker-1_C_2R-augustus-gene-82.	0.0337	1.9224	57.1179	0.0001	0	0.0082	0.0001	0	0	0.3223	0	0	0.3894	0	0	BG
snap_masked-1_C_2R-processed-gene-53.3	0.0331	0.0077	0.2343	0.1541	0.0028	0.0181	0.047	0.0011	0.024	1.3863	0.0016	0.0011	0.0295	0.0009	0.0305	BG
maker-1_C_2R-augustus-gene-22.	0.2768	0.2341	0.846	0.1472	0.0017	0.0116	0.2045	0.0017	0.0085	0.144	0.0042	0.0292	0.1451	0.002	0.0138	BG
maker-0_D_3L-snap-gene-75.124	0.0709	0.0266	0.3748	0.4004	0	0	0.0591	0.0011	0.0184	0.4401	0	0	0.072	0.0006	0.0077	BG
maker-2_E_3R-augustus-gene-78.10	0.0418	0.0073	0.1757	0.0001	0	0.0027	0.0001	0	0.0228	0.0001	0	0.0121	0.0001	0	0.0197	BG
maker-2_E_3R-augustus-gene-85.8	0.0363	2.0092	55.3312	0.3486	0.001	0.0028	0.0635	0.001	0.0152	0.0001	0	0.0061	0.0001	0	0.0213	BG
maker-1_C_2R-augustus-gene-27.90	0.1742	0.0019	0.0107	0.1682	0.0028	0.0168	0.1148	0.0057	0.0495	0.0533	0.0028	0.0527	0.2364	0.0069	0.0294	BG
augustus_masked-0_D_3L-processed-gene-22.3	0.9241	16.3097	17.6488	1.0263	0.0028	0.0027	0.0707	0.0013	0.0177	0.9	0.0018	0.002	6.2373	0.0045	0.0007	BG
maker-0_D_3L-augustus-gene-64.113	0.3525	0.2694	0.7642	0.9	0.0018	0.002	0.0683	0.0016	0.0237	1.8	0.0036	0.002	0.0793	0.0017	0.0213	BG
maker-2_E_3R-augustus-gene-81.142	0.1102	0.0604	0.5479	0.0001	0	0	0.95	0.0019	0.002	0.0001	0	0.0123	0.0001	0	0.012	BG
maker-2_E_3R-snap-gene-74.154	0.2196	0.1438	0.655	0.4552	0.0011	0.0025	0.1458	0.0035	0.0241	0.0001	0	0.0179	0.0001	0	0	BG
maker-4_B_2L-augustus-gene-30.113	0.136	0.0695	0.511	0.1017	0.0021	0.0204	0.1348	0.0055	0.0406	0.0553	0.0013	0.0227	0.1099	0.0033	0.0304	BG
maker-0_D_3L-augustus-gene-75.89	0.0989	0.0458	0.4635	0.0811	0.0026	0.0327	0.0001	0	0.0207	0.0614	0.0018	0.0287	0.0001	0	0.0142	BG
maker-1_C_2R-snap-gene-62.129	0.0769	0.0413	0.5372	0.0328	0.0006	0.0198	0.152	0.0009	0.0062	0.0291	0.0009	0.0304	0.2295	0.0009	0.0041	BG
maker-2_E_3R-augustus-gene-35.127	0.0863	0.0002	0.002	0.0001	0	0.0163	0.0292	0.0016	0.055	0.1896	0.0027	0.0144	0.0121	0.0007	0.0598	BG
maker-3_A_X-snap-gene-98.68	0.1053	0.0021	0.0199	0.5345	0	0	0.0455	0.003	0.0649	0.0001	0	0.0079	NA	NA	NA	BG
maker-1_C_2R-augustus-gene-82.107	0.1859	0.0281	0.1511	0.0001	0	0.0138	0.3789	0.4744	1.2522	0.0001	0	0.0138	0.1055	0.0243	0.2299	BG
maker-1_C_2R-augustus-gene-32.69	0.1231	0.0836	0.6793	0.5449	0.0007	0.0013	0.139	0.0048	0.0348	0.0372	0.0007	0.0198	0.048	0.0016	0.0334	BG
maker-3_A_X-augustus-gene-2.122	0.01	0.6417	64.2359	0.0001	0	0.0049	0.0001	0	0	0.0001	0	0	0.0001	0	0	BG
maker-2_E_3R-augustus-gene-21.119	0.7575	0.0147	0.0194	0.0001	0	0.0267	0.871	0.0349	0.04	0.0001	0	0.0293	NA	NA	NA	BG
maker-3_A_X-augustus-gene-51.54	0.1473	0.0777	0.5278	0.5665	0.0048	0.0085	0.0001	0	0.0029	0.1347	0.0012	0.0087	0.0001	0	0.0065	BG
maker-2_E_3R-snap-gene-75.128	0.4662	0.0386	0.0828	0.0721	0.0019	0.0258	0.0602	0.0041	0.0674	0.0001	0	0.0114	NA	NA	NA	BG
maker-3_A_X-snap-gene-92.84	0.032	1.9572	61.1312	0.0335	0.0007	0.0205	0.0001	0	0	0.0001	0	0.0154	0.0001	0	0	BG
maker-2_E_3R-snap-gene-39.125	0.7672	0.0257	0.0335	0.0001	0	0.0134	0.576	0.0301	0.0522	0.0001	0	0.0072	0.576	0.0301	0.0522	BG
maker-2_E_3R-snap-gene-1.133	0.0123	0	0	0.0001	0	0.0201	0.0001	0	0.0201	0.0175	0.0018	0.1012	0.0001	0	0.0528	BG
maker-3_A_X-augustus-gene-102.30	0.0466	1.2034	25.8371	0.0568	0.0017	0.0303	0.0541	0.0019	0.0357	0.0151	0.0006	0.0379	0.0237	0.0011	0.0469	BG
maker-1_C_2R-augustus-gene-24.124	0.0967	0.0707	0.7307	0.0001	0	0.0117	0.0001	0	0.0113	0.0641	0.0011	0.0166	0.0001	0	0.0114	BG
maker-1_C_2R-snap-gene-25.146	0.1598	0.0568	0.3554	0.4147	0.0008	0.0019	0.0774	0.0007	0.0092	0.125	0.0008	0.0064	0.8033	0.0014	0.0017	BG
maker-0_D_3L-augustus-gene-53.114	0.0301	1.4575	48.3562	0.0001	0	0.0129	0.0389	0.0017	0.0431	0.0001	0	0.0211	0.0001	0	0.0317	BG
maker-4_B_2L-augustus-gene-60.76	0.1215	0.0828	0.6816	0.351	0.0034	0.0096	0.0001	0	0	0.0001	0	0.0081	0.0001	0	0	BG
maker-3_A_X-augustus-gene-71.8	0.2347	0.082	0.3493	0.6546	0.0045	0.0069	0.6213	0.0045	0.0072	0.0001	0	0.0354	0.7721	0.0048	0.0062	BG
maker-1_C_2R-snap-gene-20.190	0.1438	0	0	0.2382	0	0	0.018	0.001	0.0552	0.9681	0.0044	0.0045	0.0001	0	0.0418	BG
maker-0_D_3L-augustus-gene-48.112	0.0655	0.0263	0.4011	0.0001	0	0.0135	0.0866	0.002	0.0226	0.0849	0.0013	0.0149	0.0181	0.0004	0.0215	BG
augustus_masked-3_A_X-processed-gene-7.9	0	0	0.0163	0.1603	0	0	NA	NA	NA	NA	NA	NA	NA	NA	NA	BG
maker-0_D_3L-augustus-gene-88.9	0.0942	1.7666	18.7601	0.0535	0.0015	0.0286	0.1109	0.0031	0.0275	0.0295	0.0008	0.026	0.0344	0.0015	0.0443	BG
maker-1_C_2R-augustus-gene-2.76	0.1657	0.1295	0.7813	0.094	0.0023	0.0241	0.0001	0	0	0.1006	0.0028	0.0279	0.4242	0	0	BG
maker-3_A_X-augustus-gene-47.6	0.0096	0.5672	58.9307	0.0001	0	0.0269	0.0001	0	0	0.0001	0	0.0315	0.0001	0	0.0076	BG
maker-3_A_X-augustus-gene-63.53	0.0133	0.0033	0.2489	0.4652	0	0	0.0001	0	0.0094	0.0001	0	0.0166	0.0001	0	0.0085	BG
maker-4_B_2L-augustus-gene-51.86	0.0616	2.2084	35.8587	0.0457	0.0013	0.0294	0.0421	0.0014	0.0321	0.0001	0	0.0328	0.0196	0.0007	0.0345	BG
augustus_masked-2_E_3R-processed-gene-104.18	0.069	0.0558	0.8079	0.0001	0	0.0091	0.0001	0	0	0.0001	0	0.0033	0.0001	0	0	BG
maker-1_C_2R-augustus-gene-65.90	0.0669	0.0215	0.3209	0.0376	0.0004	0.0098	0.0384	0.0008	0.0197	0.0001	0	0.0179	0.0001	0	0.0214	BG
maker-4_B_2L-augustus-gene-73.78	0.0289	0.0071	0.2438	0.3437	0	0	0.0001	0	0	0.0001	0	0.0096	0.0001	0	0	BG
maker-2_E_3R-augustus-gene-69.63	0.0734	0.0039	0.0535	0.0578	0.0008	0.0133	0.0423	0.0026	0.0615	0.1163	0.0018	0.0159	0.0423	0.0026	0.0615	BG
maker-3_A_X-augustus-gene-73.67	0.1092	0.0425	0.3891	0.2196	0.0005	0.0021	0.0775	0.0008	0.0098	0.5654	0.0009	0.0017	0.0799	0.0012	0.0144	BG
maker-77_U_U-augustus-gene-0.2	0.0081	0.004	0.4918	0.0001	0	0.0088	0.0001	0	0.0058	0.0001	0	0.0029	0.0001	0	0.0059	BG
maker-2_E_3R-snap-gene-35.174	0.0236	1.4276	60.5074	0.0001	0	0.0026	0.0001	0	0.0166	0.0001	0	0.0027	0.0001	0	0.002	BG
maker-0_D_3L-augustus-gene-55.152	0.02	1.1604	58.0696	0.0001	0	0.003	0.0001	0	0.0256	0.0001	0	0.006	0.0001	0	0.0058	BG
maker-1_C_2R-snap-gene-81.115	0.8146	0.9201	1.1295	0.2459	0	0	0.0001	0	0	0.4213	0	0	0.4552	0	0	BG
maker-1_C_2R-augustus-gene-37.127	0.4288	0.3611	0.842	0.0473	0.0006	0.0126	0.6976	0.0025	0.0036	1.1144	0.0017	0.0015	0.0001	0	0.03	BG
snap_masked-3_A_X-processed-gene-8.38	0.0972	0.04	0.4121	0.3394	0.0058	0.017	0.0342	0.001	0.0288	0.0001	0	0.0118	0.0001	0	0.0205	BG
maker-0_D_3L-augustus-gene-36.160	0.0756	1.259	16.6498	0.0001	0	0.0047	0.0001	0	0	0.0917	0.0009	0.0095	0.0001	0	0	BG
maker-1_C_2R-augustus-gene-33.110	0.1326	2.5841	19.4808	0.0318	0.0005	0.0145	0.0456	0.0013	0.0292	0.0327	0.0005	0.0139	0.0001	0	0.0264	BG
augustus_masked-0_D_3L-processed-gene-14.15	0.078	0.0568	0.7281	0.3232	0.0041	0.0126	0.0001	0	0.0105	0.0001	0	0.0396	0.0001	0	0.0618	BG
maker-0_D_3L-snap-gene-62.170	0.033	0.0092	0.2793	0.0264	0.0003	0.0129	0.0001	0	0.03	0.0001	0	0.0166	0.0175	0.0007	0.0392	BG
maker-0_D_3L-snap-gene-48.125	0.0651	0.0202	0.3102	0.0522	0.0011	0.0204	1.3126	0.0028	0.0021	0.0001	0	0.0064	0.0001	0	0	BG
maker-2_E_3R-augustus-gene-49.125	0.2833	10.3504	36.5321	0.0001	0	0.0105	0.0001	0	0	1.4	0.0028	0.002	0.0001	0	0	BG
maker-1_C_2R-augustus-gene-24.123	0.0776	4.5414	58.5076	1.2	0.0024	0.002	0.0001	0	0.02	0.0001	0	0.0091	0.0001	0	0.0187	BG
maker-1_C_2R-augustus-gene-7.89	0.0339	0.0136	0.4015	0.0538	0.001	0.0186	0.0001	0	0.0379	0.0162	0.0003	0.0203	0.0185	0.0006	0.033	BG
maker-3_A_X-snap-gene-66.85	0.0195	0.0001	0.0039	0.0001	0	0.0041	0.0001	0	0.0141	0.0001	0	0.0081	0.0001	0	0.0121	BG
augustus_masked-3_A_X-processed-gene-84.5	0.1459	0.0559	0.3833	0.0001	0	0.0113	0.1583	0.0024	0.0151	0.1129	0.0008	0.007	0.0943	0.0016	0.0169	BG
maker-1_C_2R-snap-gene-76.115	0.4667	0.4834	1.0357	0.3578	0.0047	0.0133	0.0851	0.0027	0.0314	3.3	0.0066	0.002	0.15	0.0021	0.0143	BG
augustus_masked-0_D_3L-processed-gene-15.24	0.0199	0.0076	0.3805	0.0001	0	0.0175	0.0001	0	0	0.0001	0	0.0026	0.0001	0	0.01	BG
maker-2_E_3R-augustus-gene-27.	0.3466	0.5534	1.5968	0.2328	0.0033	0.0142	0.0001	0	0	0.0785	0.0014	0.0172	0.0001	0	0	BG
maker-2_E_3R-augustus-gene-13.114	0.0688	0.0134	0.1955	0.0001	0	0.0146	0.1649	0.0031	0.0186	0.0001	0	0.0136	0.084	0.0015	0.0182	BG
snap_masked-1_C_2R-processed-gene-79.93	0.1786	0.085	0.4758	0.0001	0	0.0043	0.0223	0.0004	0.0186	0.0405	0.0005	0.0118	0.0548	0.0004	0.0076	BG
maker-3_A_X-augustus-gene-26.98	0.0476	0.0143	0.3002	0.4951	0.0013	0.0025	0.6	0.0012	0.002	0.0001	0	0.0154	0.0001	0	0.003	BG
maker-1_C_2R-snap-gene-19.153	0.4713	4.1277	8.7585	0.34	0.0045	0.0133	0.1311	0.0038	0.0287	0.2869	0.0076	0.0265	0.0265	0.0006	0.0239	BG
maker-4_B_2L-augustus-gene-10.80	0.1478	0.503	3.4027	0.0001	0	0.0067	0.3239	0.0026	0.008	0.0001	0	0.0447	0.3379	0.0026	0.0077	BG
maker-1_C_2R-snap-gene-44.22	0.0602	0.0279	0.4628	0.0332	0.0004	0.0112	0.7633	0.0008	0.001	0.0152	0.0004	0.0247	0.3556	0.0004	0.0011	BG
maker-2_E_3R-snap-gene-30.14	0.3678	0.1655	0.45	0.3811	0.0025	0.0066	0.3043	0.0061	0.0199	0.1928	0.003	0.0155	1.0523	0.0037	0.0035	BG
maker-1_C_2R-snap-gene-18.114	0.1987	0.9562	4.8112	0.2844	0.0065	0.0229	0.1937	0.0017	0.0088	0.3845	0.0049	0.0128	0.1073	0.0017	0.0161	BG
maker-0_D_3L-augustus-gene-36.149	0.0182	1.1991	65.8657	0.0001	0	0.028	0.0001	0	0.014	0.0001	0	0.0187	0.0001	0	0.0102	BG
maker-2_E_3R-augustus-gene-54.10	0.222	0.0617	0.2782	0.0001	0	0.0145	0.112	0.0012	0.011	0.0001	0	0.0091	0.0871	0.0012	0.0142	BG
maker-0_D_3L-augustus-gene-41.142	0.2026	0.0109	0.0537	0.4389	0.0058	0.0133	0.4389	0.0058	0.0133	0.1741	0.0081	0.0467	0.3434	0.0127	0.0371	BG
maker-3_A_X-augustus-gene-82.49	0.0639	0.0186	0.2918	0.0001	0	0.0093	0.0001	0	0	0.0001	0	0.0261	0.0001	0	0	BG
maker-3_A_X-augustus-gene-84.28	0.5859	0.011	0.0188	0.0001	0	0.0164	0.0001	0	0.0398	0.0001	0	0.0095	NA	NA	NA	BG
maker-4_B_2L-augustus-gene-21.142	0.1558	0.1245	0.7988	0.0513	0.0011	0.0213	0.0468	0.0011	0.0231	0.1103	0.0022	0.0199	0.1086	0.0028	0.0262	BG
augustus_masked-3_A_X-processed-gene-32.4	0.2017	0.1329	0.6592	0.2379	0.0015	0.0062	0.0261	0.0017	0.0659	0.5305	0.0047	0.0088	0.0768	0.0033	0.0432	BG
maker-1_C_2R-augustus-gene-80.125	0.809	0.9562	1.182	0.0104	0.0002	0.0216	0.2451	0.0021	0.0087	0.0472	0.0011	0.0225	0.1897	0.0014	0.0073	BG
maker-4_B_2L-augustus-gene-12.46	0.0645	0.8617	13.3644	0.0001	0	0.0214	0.0001	0	0.0309	0.0001	0	0.0303	0.033	0.0014	0.0411	BG
maker-1_C_2R-snap-gene-74.150	0.2797	0.0641	0.229	0.2689	0.0024	0.009	0.2972	0.0173	0.0581	0.0001	0	0.0227	0.1405	0.0025	0.0177	BG
maker-0_D_3L-augustus-gene-39.106	0.0562	0.0292	0.52	0.2166	0.0009	0.004	0.116	0.0018	0.0155	0.1357	0.0009	0.0068	0.1883	0.0017	0.0092	BG
maker-3_A_X-snap-gene-15.53	1.2639	2.0329	1.6085	0.6	0.0012	0.002	0.0001	0	0	0.2004	0.0013	0.0062	0.252	0	0	BG
augustus_masked-0_D_3L-processed-gene-32.12	0.1378	0.0766	0.5556	0.0001	0	0.0324	0.0001	0	0.0303	0.0001	0	0.0294	0.0382	0.0016	0.0428	BG
maker-1_C_2R-augustus-gene-81.112	0.108	0.0276	0.2559	0.4243	0	0	0.0679	0.0021	0.0303	0.1887	0.0021	0.0109	0.0001	0	0.0332	BG
snap_masked-1_C_2R-processed-gene-17.94	0.1676	0.0137	0.0816	0.0001	0	0	0.0001	0	0.0086	0.0001	0	0.031	1	0.002	0.002	BG
maker-1_C_2R-augustus-gene-2.79	0.0509	0.0347	0.6814	0.0001	0	0.0294	0.0001	0	0	0.0001	0	0.037	0.0001	0	0	BG
maker-2_E_3R-augustus-gene-2.96	0.1156	0.74	6.4008	0.0001	0	0.011	0.0001	0	0.0181	0.0001	0	0.0193	0.3229	0.0011	0.0035	BG
snap_masked-0_D_3L-processed-gene-79.45	0.0806	0.0151	0.1868	1.4878	0	0	0.0001	0	0.0269	0.3048	0.0029	0.0094	0.0915	0.0012	0.0127	BG
maker-1_C_2R-snap-gene-40.197	0.0329	1.8143	55.0938	0.1085	0.0008	0.0072	0.0001	0	0.0048	0.0001	0	0.0073	0.0001	0	0.0049	BG
maker-2_E_3R-snap-gene-97.103	0.1135	0.1965	1.7307	0.339	0.0151	0.0445	0.0001	0	0	0.0542	0.0031	0.0576	0.2511	0	0	BG
maker-0_D_3L-snap-gene-85.	0.493	0.4309	0.8739	0.8041	0.0057	0.007	0.0001	0	0.0141	0.6929	0.0079	0.0114	0.5089	0.0017	0.0034	BG
maker-0_D_3L-augustus-gene-65.66	0.2791	0.0747	0.2677	0.0001	0	0.0035	0.18	0.0043	0.0239	0.4378	0.0021	0.0048	0.2047	0.0052	0.0253	BG
maker-0_D_3L-augustus-gene-75.103	0.0793	0.0385	0.4859	0.0001	0	0.021	0.0354	0.0017	0.0493	0.0535	0.0009	0.0172	0.0335	0.0018	0.0539	BG
maker-1_C_2R-snap-gene-66.115	0.0903	0.0431	0.4777	0.0119	0.0004	0.0317	0.0709	0.0024	0.034	0.0914	0.0023	0.0251	0.0105	0.0004	0.0407	BG
maker-0_D_3L-snap-gene-16.148	0.0864	0.0093	0.1077	0.0001	0	0.0057	0.5576	0	0	0.0001	0	0	0.3069	0.0045	0.0146	BG
maker-1_C_2R-snap-gene-3.138	0.1387	0.0839	0.605	0.6605	0.0023	0.0035	0.0001	0	0	0.1745	0.0011	0.0066	0.0001	0	0	BG
maker-3_A_X-augustus-gene-7.72	0.0871	0.0445	0.5107	0.0561	0.0014	0.0242	0.0001	0	0.0211	0.0765	0.0014	0.0179	0.034	0.0007	0.0199	BG
maker-0_D_3L-augustus-gene-84.93	0.0748	1.9547	26.1216	0.1182	0.0016	0.0136	0.0001	0	0.0146	0.1146	0.0017	0.0147	0.0001	0	0.0216	BG
maker-0_D_3L-augustus-gene-34.83	0.3446	0.2869	0.8324	1.1	0.0022	0.002	1.1	0.0022	0.002	0.0001	0	0.006	1.25	0.0025	0.002	BG
maker-4_B_2L-augustus-gene-91.60	0.0768	1.1357	14.7809	0.0001	0	0.0076	0.1235	0.0049	0.0395	0.0001	0	0.0204	0.1087	0.0027	0.0247	BG
augustus_masked-2_E_3R-processed-gene-36.15	0.1546	0.0826	0.534	0.0641	0.001	0.0161	0.1621	0.0017	0.0106	0.0953	0.0021	0.0218	0.1616	0.0017	0.0108	BG
maker-0_D_3L-augustus-gene-56.96	0.0342	0.0006	0.019	0.2685	0	0	0.0001	0	0.0335	0.0001	0	0.0081	0.0001	0	0.0206	BG
augustus_masked-1_C_2R-processed-gene-83.3	0.1574	0.0739	0.4695	0.1083	0.0032	0.0299	0.117	0.003	0.0255	0.196	0.0033	0.0171	0.2501	0.0059	0.0236	BG
maker-4_B_2L-augustus-gene-80.115	0.0231	1.428	61.8928	0.0001	0	0.0031	0.0769	0.0009	0.0123	0.1064	0.001	0.0089	0.1642	0.0009	0.0058	BG
maker-3_A_X-augustus-gene-55.67	0.3323	0.2028	0.6104	0.5252	0.0047	0.0089	0.4669	0.0054	0.0115	0.3732	0.0076	0.0203	0.1645	0.0033	0.0199	BG
augustus_masked-0_D_3L-processed-gene-30.10	0.2224	3.2213	14.4837	0.2503	0.0052	0.0207	0.1047	0.004	0.0383	0.0575	0.0012	0.0206	0.1165	0.0044	0.0378	BG
maker-0_D_3L-snap-gene-62.18	0.3153	1.0897	3.4562	0.0001	0	0.0192	0.1123	0.003	0.027	0.0001	0	0.0469	0.0001	0	0.0139	BG
augustus_masked-5_U_U-processed-gene-20.6	0	0	0.0009	0.2756	0	0	NA	NA	NA	0.3419	0	0	10.6989	0	0	BG
snap_masked-0_D_3L-processed-gene-21.68	0.1212	0.0204	0.1686	0.7136	0	0	0.0433	0.0045	0.1036	0.1614	0.0015	0.0092	0.2108	0.0038	0.0181	BG
snap_masked-2_E_3R-processed-gene-107.4	0.3068	1.2507	4.0769	0.2769	0.003	0.011	0.1397	0.0062	0.0445	0.1663	0.0036	0.0216	0.1508	0.0057	0.038	BG
maker-0_D_3L-augustus-gene-41.132	0.1041	2.2852	21.9477	0.1493	0.0028	0.0189	0.0001	0	0.0077	0.231	0.0019	0.0081	0.0719	0.0021	0.0292	BG
maker-2_E_3R-augustus-gene-75.94	0.1626	0.0637	0.3914	0.0844	0.0016	0.0193	0.2079	0.0032	0.0152	0.1068	0.0018	0.0172	0.1137	0.0018	0.0161	BG
maker-1_C_2R-augustus-gene-22.98	0.1596	0.0515	0.3226	0.0001	0	0.0096	0.3267	0.0059	0.0181	0.0001	0	0.0155	0.4581	0.0058	0.0127	BG
maker-1_C_2R-augustus-gene-75.109	0.0839	0.0524	0.6245	0.0001	0	0.021	0.0287	0.0009	0.0327	0.0529	0.0009	0.0176	0.0225	0.0009	0.0418	BG
snap_masked-0_D_3L-processed-gene-17.60	0.0494	2.6299	53.1853	0.0001	0	0.0056	0.1614	0.0016	0.0102	0.0696	0.0009	0.0131	0.0001	0	0.0097	BG
maker-1_C_2R-augustus-gene-43.143	0.0553	0.0102	0.1847	0.0001	0	0.0102	0.0352	0.0009	0.0261	0.1182	0.0009	0.0079	0.0001	0	0.0084	BG
augustus_masked-3_A_X-processed-gene-95.2	0.4998	0.208	0.4162	0.0001	0	0.0145	4.8	0.0096	0.002	0.1314	0.0024	0.018	0.8145	0.011	0.0134	BG
maker-0_D_3L-augustus-gene-80.92	0.1599	6.7926	42.4743	0.0001	0	0.0096	1.05	0.0021	0.002	0.0001	0	0.0025	0.8	0.0016	0.002	BG
maker-0_D_3L-snap-gene-25.103	4.1763	4.6559	1.1149	0.0001	0	0.0049	3.1749	0.0352	0.0111	0.0001	0	0.0048	0.0001	0	0.0115	BG
maker-0_D_3L-augustus-gene-73.14	0.1625	0.1113	0.6854	0.2101	0.0021	0.0101	0.3795	0.0012	0.0031	0.0001	0	0.0168	0.157	0.0021	0.0133	BG
maker-2_E_3R-snap-gene-60.18	0.4539	0.1524	0.3357	0.0001	0	0	0.0499	0.0021	0.0424	0.0001	0	0.0059	0.0548	0.0009	0.0167	BG
snap_masked-2_E_3R-processed-gene-59.110	0.136	0.0097	0.0717	0.0001	0	0	0.0001	0	0.0075	0.0001	0	0.0059	0.2938	0.0018	0.0061	BG
augustus_masked-0_D_3L-processed-gene-83.16	0.3243	1.0501	3.2383	0.2144	0	0	0.1181	0.001	0.0088	0.2387	0.0021	0.0088	0.1786	0.001	0.0058	BG
maker-0_D_3L-augustus-gene-63.	0.2783	0.0152	0.0546	0.4151	0.0045	0.0109	0.239	0.0332	0.1391	0.1474	0.0019	0.0132	NA	NA	NA	BG
maker-0_D_3L-augustus-gene-29.7	0.16	0.14	0.8748	0.0214	0.0006	0.028	0.0388	0.0018	0.0474	0.2233	0.0043	0.0191	0.1205	0.0043	0.0359	BG
maker-3_A_X-augustus-gene-101.80	0.0248	1.1507	46.4071	0.0001	0	0	0.0001	0	0.0082	0.0001	0	0.0255	0.0001	0	0	BG
maker-3_A_X-snap-gene-38.86	0.0518	0.0134	0.258	0.0347	0.001	0.0287	0.0386	0.001	0.0252	0.0001	0	0.0258	0.0001	0	0.014	BG
maker-2_E_3R-augustus-gene-108.42	0.0026	0.0001	0.0274	0.0001	0	0.0161	0.0001	0	0.0161	0.0001	0	0.0911	0.3674	0	0	BG
snap_masked-4_B_2L-processed-gene-36.49	0.0562	0.016	0.2851	0.0001	0	0	0.0001	0	0.0233	0.0001	0	0.0114	0.0001	0	0.0119	BG
maker-3_A_X-augustus-gene-55.79	0.0573	0.0203	0.3534	0.0954	0.0006	0.0068	0.0001	0	0.0245	0.0001	0	0.0101	0.0001	0	0.019	BG
maker-2_E_3R-augustus-gene-82.98	0.0697	1.0483	15.0312	0.0307	0.0006	0.0191	0.0242	0.0006	0.0244	0.1277	0.0018	0.0138	0.0952	0.0018	0.0186	BG
maker-2_E_3R-augustus-gene-34.103	0.0639	1.3122	20.5404	0.0001	0	0.0042	0.0903	0.0014	0.0156	0.0001	0	0.0242	0.0001	0	0.0123	BG
maker-2_E_3R-augustus-gene-58.122	0.2021	7.9151	39.166	0.1071	0.0011	0.0105	0.0001	0	0.0068	0.0001	0	0.0101	0.0001	0	0.007	BG
maker-0_D_3L-augustus-gene-1.62	0.058	0.0307	0.53	0.0001	0	0.0055	0.1645	0.0009	0.0057	0.0001	0	0.0114	0.0001	0	0.0055	BG
augustus_masked-1_C_2R-processed-gene-9.29	0.6193	1.8578	2.9998	5.65	0.0113	0.002	0.0001	0	0.0322	0.9364	0.0122	0.0131	0.0001	0	0.0323	BG
maker-2_E_3R-augustus-gene-71.126	0.1354	0.0346	0.256	0.0001	0	0.0074	0.9	0.0018	0.002	0.2044	0.001	0.0047	0.3879	0.0039	0.0101	BG
maker-1_C_2R-augustus-gene-52.72	0.0386	0.0041	0.1066	0.416	0	0	0.0001	0	0	2.35	0.0047	0.002	NA	NA	NA	BG
maker-2_E_3R-augustus-gene-63.139	0.0299	1.1136	37.2065	0.0001	0	0.0056	0.027	0.0013	0.0471	0.0001	0	0.0176	0.0001	0	0.0586	BG
maker-2_E_3R-augustus-gene-107.106	0.0694	0.0465	0.6702	0.0001	0	0.0074	0.0001	0	0	0.0815	0.0008	0.0096	0.0001	0	0	BG
[truncated: 6,469 more rows]
